# Supplementary material for: Sequential lipidomic, metabolomic, and proteomic analyses of serum, liver, and heart tissue specimens from peroxisomal biogenesis factor 11α knockout mice
Source: PubMed Central journal article supplement (PMC8821073; doi:10.1007/s00216-021-03860-0), 2022-01-27
Supplement: 216_2021_3860_MOESM1_ESM.pdf [file 216_2021_3860_MOESM1_ESM.pdf]

## Electronic Supplementary Material

### Sequential lipidomic, metabolomic and proteomic analyses of serum, liver and heart tissue specimens from peroxisomal biogenesis factor 11 $\alpha$ knockout mice

Vannuruswamy Garikapati<sup>1,2</sup>, Claudia Colasante<sup>2</sup>, Eveline Baumgart-Vogt<sup>2\*</sup>, Bernhard Spengler<sup>1\*</sup>

<sup>1</sup>Institute of Inorganic and Analytical Chemistry, Justus Liebig University Giessen, 35392 Giessen, Germany

<sup>2</sup>Institute for Anatomy and Cell Biology II, Division of Medical Cell Biology, Justus Liebig University Giessen, 35392 Giessen, Germany

| <b>Electronic Supplementary Material (ESM_1)</b> | <b>Page No</b> |
|--------------------------------------------------|----------------|
| Table S1                                         | 4              |
| Table S2                                         | 5              |
| Table S3                                         | 6              |
| Table S4                                         | 7-9            |
| Table S5                                         | 10             |
| Table S6                                         | 11             |
| Table S7                                         | 12             |
| Table S8                                         | 13             |
| Table S9                                         | 14             |
| Table S10                                        | 15             |
| Table S11                                        | 16             |
| Figure S1                                        | 17             |
| Figure S2                                        | 18             |
| Figure S3                                        | 19             |
| Figure S4                                        | 20-21          |
| Figure S5                                        | 22-24          |
| Figure S6                                        | 25             |
| Table S12                                        | 26-28          |
| Figure S7                                        | 29             |

## **Additional Electronic Supplementary Material**

### **Electronic Supplementary Material (ESM\_2; Data file S1)**

Data file S1      Details on lipid identification and relative-quantification by LipidSearch software

### **Electronic Supplementary Material (ESM\_3; Dataset S1)**

Dataset S1      Lipidomics raw dataset (Microsoft Excel worksheets)

### **Electronic Supplementary Material (ESM\_4; Dataset S2)**

Dataset S2      Metabolomics raw dataset (Microsoft Excel worksheets)

### **Electronic Supplementary Material (ESM\_5; Dataset S3)**

Dataset S3      Proteomics raw dataset (Microsoft Excel worksheets)

### **Electronic Supplementary Material (ESM\_6; Data file S2)**

Data file S2      Proteomics raw data quality evaluation using RawMeat software

### **Electronic Supplementary Material (ESM\_7; Data file S3)**

Data file S3      Bioinformatics analysis of differentially abundant proteins using PANTHER and BiNGO

**Table S1** Reversed-phase chromatographic separation method for lipidomics experiments independently in positive- and negative-ion mode

| <b>Time<br/>(min)</b> | <b>Flow rate<br/>(ml/min)</b> | <b>Mobile phase A<br/>(%)</b> | <b>Mobile phase B<br/>(%)</b> |
|-----------------------|-------------------------------|-------------------------------|-------------------------------|
| 0                     | 0.250                         | 70                            | 30                            |
| 2                     | 0.250                         | 57                            | 43                            |
| 2.1                   | 0.250                         | 45                            | 55                            |
| 12                    | 0.250                         | 35                            | 65                            |
| 18                    | 0.250                         | 15                            | 85                            |
| 20                    | 0.250                         | 0                             | 100                           |
| 25                    | 0.250                         | 0                             | 100                           |
| 25.1                  | 0.250                         | 70                            | 30                            |
| 28                    | 0.250                         | 70                            | 30                            |

Mobile phase A: H<sub>2</sub>O:ACN, 40:60 (v/v) with 10 mM ammonium formate and 0.1% formic acid

Mobile phase B: IPA:ACN, 90:10 (v/v) with 10 mM ammonium formate and 0.1% formic acid

H<sub>2</sub>O: Water

ACN: Acetonitrile

IPA: Isopropyl alcohol/2-propanol

**Table S2** Heated electrospray ionization (HESI-II) source parameters for lipidomics experiments separately in positive- and negative-ion mode

| <b>Tune parameters</b>            | <b>Positive-ion mode</b> | <b>Negative-ion mode</b> |
|-----------------------------------|--------------------------|--------------------------|
| Sheath gas (a.u.)                 | 35                       | 35                       |
| Auxiliary gas (a.u.)              | 12                       | 12                       |
| Sweep gas (a.u.)                  | 1                        | 1                        |
| Spray voltage (kV)                | 4.35                     | 4.00                     |
| Capillary temperature (°C)        | 330                      | 330                      |
| S-lens RF                         | 55                       | 55                       |
| Auxiliary heater temperature (°C) | 325                      | 325                      |

a.u.: Arbitrary units

kV: Kilovolt

RF: Radio frequency

**Table S3** Full scan/data-dependent MS/MS acquisition (Full MS/ddMS<sup>2</sup>, Top15) method parameters for lipidomics experiments individually in positive- and negative-ion mode

| Method parameters               | Positive-ion mode                  | Negative-ion mode                  |
|---------------------------------|------------------------------------|------------------------------------|
| Time (min)                      | 28                                 | 28                                 |
| Internal lock mass              | 391.28421                          | -                                  |
| Charge state (Z)                | 1                                  | 1                                  |
| Exclusion list                  | On                                 | -                                  |
| Resolution                      | 70,000 (35,000)                    | 70,000 (35,000)                    |
| AGC target                      | 1e <sup>6</sup> (1e <sup>5</sup> ) | 1e <sup>6</sup> (1e <sup>5</sup> ) |
| Maximum IT (ms)                 | 250 (75)                           | 250 (75)                           |
| Scan range                      | 200-1800                           | 200-1800                           |
| TopN                            | 15                                 | 15                                 |
| Isolation window ( <i>m/z</i> ) | 1                                  | 1                                  |
| Stepped NCE                     | 25, 30                             | 20, 30, 40                         |
| Underfill ratio (%)             | 0.6                                | 0.6                                |
| Intensity threshold             | 8e <sup>3</sup>                    | 8e <sup>3</sup>                    |
| Exclude isotopes                | On                                 | On                                 |
| Dynamic exclusion (s)           | 8                                  | 8                                  |

Values in the parenthesis represent for MS<sup>2</sup>

AGC: Automatic gain control

IT: Ion injection time

*m/z*: mass-to-charge ratio

NCE: Normalized collision energy

Prior to the sequential omics data acquisition, Q Exactive Orbitrap MS was externally calibrated in both positive- and negative-ion mode. Further, in positive-ion mode *m/z* 391.28421 (diisooctyl phthalate) was used as internal lock mass while no lock masses were used in negative-ion mode. Exclusion *m/z* ion list (for lipidomics experiments in positive-ion mode) was prepared from the extraction blank injections, which were acquired on a cleaned LC-MS/MS system (after MS instrument bakeout, mass calibration and LC maintenance, etc.) using a brand-new reversed-phase LC column and fresh LC-MS grade solvents. In addition, solvent blank and corresponding pooled extract samples were acquired independently in positive- and negative-ion mode at scheduled intervals during all omics data acquisition

**Table S4** Filters applied in LipidSearch software (v4.2.23) to remove/minimize false positives after the alignment process

Rej = false and ({MainGrade[c]}.in ("A", "B", "C") or {MainGrade[s1]}.in ("A", "B", "C") or {MainGrade[s2]}.in ("A", "B", "C")) and

|                       |                                                                            |    |
|-----------------------|----------------------------------------------------------------------------|----|
| ((Class = "Cer"       | and (MainIon = "+H" or MainIon = "+HCOO"))                                 | or |
| (Class = "CerP"       | and (MainIon = "+H" or MainIon = "+HCOO"))                                 | or |
| (Class = "Hex1Cer"    | and (MainIon = "+H" or MainIon = "+HCOO"))                                 | or |
| (Class = "Hex2Cer"    | and (MainIon = "+H" or MainIon = "+HCOO"))                                 | or |
| (Class = "Hex3Cer"    | and (MainIon = "+H" or MainIon = "+HCOO"))                                 | or |
| (Class = "SPH"        | and (MainIon = "+H" or MainIon = "+H-H <sub>2</sub> O"))                   | or |
| (Class = "SPHP"       | and (MainIon = "+H" or MainIon = "+H-H <sub>2</sub> O"))                   | or |
| (Class = "ChE"        | and (MainIon = "+NH <sub>4</sub> " or MainIon = "+H-H <sub>2</sub> O"))    | or |
| (Class = "PIP"        | and (MainIon = "+Na" or MainIon = "-H"))                                   | or |
| (Class = "PIP2"       | and (MainIon = "+Na" or MainIon = "-H"))                                   | or |
| (Class = "SM"         | and MainIon = "+H")                                                        | or |
| (Class = "MG"         | and MainIon = "+H")                                                        | or |
| (Class = "AEA"        | and MainIon = "+NH <sub>4</sub> ")                                         | or |
| (Class = "CerG2GNAc1" | and (MainIon = "+H" or MainIon = "-H" or MainIon = "+H-H <sub>2</sub> O")) | or |
| (Class = "OAHFA"      | and MainIon = "-H")                                                        | or |
| (Class = "PEt"        | and (MainIon = "+H" or MainIon = "-H"))                                    | or |
| (Class = "PMe"        | and (MainIon = "+H" or MainIon = "-H"))                                    | or |
| (Class = "GM3"        | and (MainIon = "+H" or MainIon = "-H"))                                    | or |
| (Class = "GM2"        | and (MainIon = "+H" or MainIon = "-H"))                                    | or |
| (Class = "ST"         | and (MainIon = "+H" or MainIon = "-H"))                                    | or |
| (Class = "FA"         | and MainIon = "-H"))                                                       | or |

Rej = false and ({MainGrade[c]}.in ("A", "B") or {MainGrade[s1]}.in ("A", "B") or {MainGrade[s2]}.in ("A", "B")) and

|                |                                                         |    |
|----------------|---------------------------------------------------------|----|
| ((Class = "Co" | and (MainIon = "+NH <sub>4</sub> " or MainIon = "+H"))  | or |
| (Class = "DG"  | and (MainIon = "+NH <sub>4</sub> " or MainIon = "+Na")) | or |

|                   |                                                        |    |
|-------------------|--------------------------------------------------------|----|
| (Class = "TG"     | and MainIon = "+NH <sub>4</sub> ")                     | or |
| (Class = "AcCa"   | and MainIon = "+H")                                    | or |
| (Class = "CL"     | and MainIon = "-H")                                    | or |
| (Class = "DLCL"   | and MainIon = "-H")                                    | or |
| (Class = "MLCL"   | and MainIon = "-H")                                    | or |
| (Class = "LPA"    | and MainIon = "-H")                                    | or |
| (Class = "PA"     | and MainIon = "-H")                                    | or |
| (Class = "LdMePE" | and (MainIon = "+H" or MainIon = "-H"))                | or |
| (Class = "dMePE"  | and (MainIon = "+H" or MainIon = "-H"))                | or |
| (Class = "LPC"    | and (MainIon = "+H" or MainIon = "+HCOO"))             | or |
| (Class = "PC"     | and (MainIon = "+H" or MainIon = "+HCOO"))             | or |
| (Class = "LPE"    | and (MainIon = "+H" or MainIon = "-H"))                | or |
| (Class = "PE"     | and (MainIon = "+H" or MainIon = "-H"))                | or |
| (Class = "LPG"    | and (MainIon = "+NH <sub>4</sub> " or MainIon = "-H")) | or |
| (Class = "PG"     | and (MainIon = "+NH <sub>4</sub> " or MainIon = "-H")) | or |
| (Class = "LPI"    | and (MainIon = "+NH <sub>4</sub> " or MainIon = "-H")) | or |
| (Class = "PI"     | and (MainIon = "+NH <sub>4</sub> " or MainIon = "-H")) | or |
| (Class = "LPS"    | and (MainIon = "+H" or MainIon = "-H"))                | or |
| (Class = "PS"     | and (MainIon = "+H" or MainIon = "-H"))                |    |

## LipidSearch software (v4.2.23) parameters

### Search/Identification parameters

Database – General and HCD; Search Type – Product; Experiment Type – LC-MS; Parent Tolerance – 0.1 Da; NL/Prec Tol – 0.5 Da; Precursor Tolerance (MS) – 5.0 ppm; Product (MS/MS) Tolerance – 5.0 ppm; Merge Range (Min) – 0.0; Minimal Peak Width (min) – 0.0; Threshold Type – Relative; Product Ion – 1.0%; m-score threshold – 2.0; Recalculate Isotope – ON; R.T. Interval (min) – 0.0; Execute Quantitation – ON; *m/z* Tolerance – -5.0/+5.0; Tolerance Type – ppm; R.T. range (min) – -0.5/+0.5; Top rank filter – ON; Main Node Filter – Main Isomer Peak; m-Score Threshold (Display) – 5.0; C-Score Threshold (Display) – 2.0; Fatty Acid Priority (FA Priority) – ON; ID Quality Filter – (A, B, C, D); Adducts – (in positive-ion mode) +H, +NH<sub>4</sub>, +Na, +K, +H-H<sub>2</sub>O, +H-2H<sub>2</sub>O, +2H; Adducts – (in negative-ion mode) -H, +HCOO, -CH<sub>3</sub>, -2H



## Alignment parameters

Search Type – Product; Experiment Type – LC-MS; Alignment Method – Mean; R.T. Tolerance – 0.25; Calculate Unassigned Peak Area – ON; Filter Type – New Filter; Top rank Filter – ON; Main Node Filter – All isomer peaks; m-score threshold – 5.0; ID Quality – A, B and/or C

## Fragmentation grade/Identification level

**Grade A:** Lipid class and fatty acyl chains (FAs) were completely identified

**Grade B:** Lipid class and some FAs were identified

**Grade C:** Lipid class or FAs were identified

**Grade D:** Lipids identified based on neutral losses (e.g. H<sub>2</sub>O)

## Abbreviations

AEA: N-Acylethanolamine; AcCa: Acylcarnitines or Carnitine esters; CL: Cardiolipin; Cer: Ceramide; CerG2GNAc1, Hex1Cer, Hex2Cer and Hex3Cer: Simple Glc series; CerP: Ceramides phosphate; ChE: Cholesteryl esters and/or Cholesterol; Co: Coenzyme; DG: Diglyceride; DLCL: Cardiolipin (dilyso); FA: Fatty acid and/or Fatty acyl chain; GM2 and GM3: Gangliosides; LPA: Lysophosphatidic acid; LPC: Lysophosphatidylcholine; LPE: Lysophosphatidylethanolamine; LPG: Lysophosphatidylglycerol; LPI: Lysophosphatidylinositol; LPS: Lysophosphatidylserine; LdMePE: Lysodimethylphosphatidylethanolamine; MG: Monoglyceride; MLCL: Cardiolipin (monolyso); OAHFA: OAcyl-(gamma-hydroxy) fatty acid; PA: Phosphatidic acid; PC: Phosphatidylcholine; PE: Phosphatidylethanolamine; PEt: Phosphatidylethanol; PG: Phosphatidylglycerol; PI: Phosphatidylinositol; PIP: Phosphatidylinositol phosphate; PIP2: Phosphatidylinositol bisphosphate; PMe: Phosphatidylmethanol; PS: Phosphatidylserine; SM: Sphingomyelin; SPH: Sphingosine; SPHP: Sphingosine phosphate; ST: Sulfatide; TG: Triglyceride; dMePE: Dimethylphosphatidylethanolamine; C: Wild type control; S1: *Pex11α* knockout; S2: Pooled sample; Ion-adducts: +H, +Na, +NH<sub>4</sub>, +H-H<sub>2</sub>O, +HCOO and –H; m-score: Fragmentation match score; HCD: Higher-energy collisional dissociation; RT: Retention time

## References

1. Peake DA et al., Processing of a complex lipid dataset for the NIST inter-laboratory comparison exercise for lipidomics measurements in human serum and plasma. ASMS 2015 Poster
2. Kiyonami R, Peake DA et al., Large scale lipid profiling of a human serum lipidome using a high-resolution accurate-mass LC/MS/MS approach. LIPID MAPS Annual Meeting 2015 Poster
3. Breitkopf SB, Ricoult SJH, Yuan M, Xu Y, Peake DA, Manning BD et al., A relative quantitative positive/negative ion switching method for untargeted lipidomics via high-resolution LC-MS/MS from any biological source. *Metabolomics*. 2017;13(3)
4. Li Z, Lai ZW, Christiano R, Gazos-Lopes F, Walther TC, Farese RV, Jr. Global analyses of selective insulin resistance in hepatocytes caused by palmitate lipotoxicity. *Mol Cell Proteomics*. 2018;17(5):836-49

**Table S5** Reversed-phase chromatographic separation method for metabolomics experiments of tissue homogenates (liver and heart) independently in positive- and negative-ion mode

| <b>Time<br/>(min)</b> | <b>Flow rate<br/>(ml/min)</b> | <b>Mobile phase A<br/>(%)</b> | <b>Mobile phase B<br/>(%)</b> |
|-----------------------|-------------------------------|-------------------------------|-------------------------------|
| 0                     | 0.300                         | 99                            | 1                             |
| 1.5                   | 0.300                         | 99                            | 1                             |
| 15                    | 0.300                         | 1                             | 99                            |
| 17.5                  | 0.300                         | 1                             | 99                            |
| 17.8                  | 0.300                         | 99                            | 1                             |
| 20                    | 0.300                         | 99                            | 1                             |

Mobile phase A: 100% water with 0.1% formic acid

Mobile phase B: 100% acetonitrile with 0.1% formic acid

**Table S6** Reversed-phase chromatographic separation method for metabolomics experiments of serum samples independently in positive- and negative-ion mode

| <b>Time<br/>(min)</b> | <b>Flow rate<br/>(ml/min)</b> | <b>Mobile phase A<br/>(%)</b> | <b>Mobile phase B<br/>(%)</b> |
|-----------------------|-------------------------------|-------------------------------|-------------------------------|
| 0                     | 0.300                         | 99                            | 1                             |
| 1                     | 0.300                         | 85                            | 15                            |
| 4                     | 0.300                         | 65                            | 35                            |
| 7                     | 0.300                         | 5                             | 95                            |
| 9                     | 0.300                         | 5                             | 95                            |
| 10                    | 0.300                         | 99                            | 1                             |
| 14                    | 0.300                         | 99                            | 1                             |

Mobile phase A: 100% water with 0.1% formic acid

Mobile phase B: 100% methanol with 0.1% formic acid

**Table S7** Heated electrospray ionization (HESI-II) source parameters for metabolomics experiments separately in positive- and negative-ion mode

| <b>Tune parameters</b>            | <b>Positive-ion mode</b> | <b>Negative-ion mode</b> |
|-----------------------------------|--------------------------|--------------------------|
| Sheath gas (a.u.)                 | 42                       | 42                       |
| Auxiliary gas (a.u.)              | 11                       | 11                       |
| Sweep gas (a.u.)                  | 0                        | 0                        |
| Spray voltage (kV)                | 4.0                      | 3.5                      |
| Capillary temperature (°C)        | 300                      | 300                      |
| S-lens RF                         | 55                       | 55                       |
| Auxiliary heater temperature (°C) | 310                      | 310                      |

a.u.: Arbitrary units

kV: Kilovolt

RF: Radio frequency

**Table S8** Full scan/data-dependent MS/MS acquisition (Full MS/ddMS<sup>2</sup>, Top10) method parameters for metabolomics experiments individually in positive- and negative-ion mode

| Method parameters               | Positive-ion mode                  | Negative-ion mode                  |
|---------------------------------|------------------------------------|------------------------------------|
| Time (min)                      | 20 / 14                            | 20 / 14                            |
| Internal lock mass              | 391.28421                          | -                                  |
| Charge state (Z)                | 1                                  | 1                                  |
| Resolution                      | 70,000 (17,500)                    | 70,000 (17,500)                    |
| AGC target                      | 1e <sup>6</sup> (1e <sup>5</sup> ) | 1e <sup>6</sup> (1e <sup>5</sup> ) |
| Maximum IT (ms)                 | 120 (80)                           | 120 (80)                           |
| Scan range                      | 67-1000                            | 67-1000                            |
| TopN                            | 10                                 | 10                                 |
| Isolation window ( <i>m/z</i> ) | 1.5                                | 1.5                                |
| Stepped NCE                     | 30, 35                             | 25, 30, 35                         |
| Underfill ratio (%)             | 0.7                                | 0.7                                |
| Intensity threshold             | 8e <sup>3</sup>                    | 8e <sup>3</sup>                    |
| Dynamic exclusion (s)           | 10                                 | 10                                 |

Values in the parenthesis represent for MS<sup>2</sup>

AGC: Automatic gain control

IT: Ion injection time

*m/z*: mass-to-charge ratio

NCE: Normalized collision energy

**Table S9** Reversed-phase chromatographic separation method for proteomics experiments in positive-ion mode

| <b>Time<br/>(min)</b> | <b>Flow rate<br/>(ml/min)</b> | <b>Mobile phase A<br/>(%)</b> | <b>Mobile phase B<br/>(%)</b> |
|-----------------------|-------------------------------|-------------------------------|-------------------------------|
| 0                     | 0.250                         | 97                            | 3                             |
| 5                     | 0.250                         | 97                            | 3                             |
| 95                    | 0.250                         | 60                            | 40                            |
| 105                   | 0.250                         | 50                            | 50                            |
| 108                   | 0.250                         | 2                             | 98                            |
| 110                   | 0.250                         | 2                             | 98                            |
| 112                   | 0.250                         | 97                            | 3                             |
| 120                   | 0.250                         | 97                            | 3                             |

Mobile phase A: 100% water with 0.1% formic acid

Mobile phase B: 100% acetonitrile with 0.1% formic acid

**Table S10** Heated electrospray ionization (HESI-II) source parameters for proteomics experiments in positive-ion mode

| <b>Tune parameters</b>            | <b>Positive-ion mode</b> |
|-----------------------------------|--------------------------|
| Sheath gas (a.u.)                 | 30                       |
| Auxiliary gas (a.u.)              | 8                        |
| Sweep gas (a.u.)                  | 0                        |
| Spray voltage (kV)                | 4.2                      |
| Capillary temperature (°C)        | 320                      |
| S-lens RF                         | 55                       |
| Auxiliary heater temperature (°C) | 200                      |

a.u.: Arbitrary units

kV: Kilovolt

RF: Radio frequency

**Table S11** Full scan/data-dependent MS/MS acquisition (Full MS/ddMS<sup>2</sup>, Top10) method parameters for proteomics experiments in positive-ion mode

| Method parameters               | Positive-ion mode                  |
|---------------------------------|------------------------------------|
| Time (min)                      | 120                                |
| Internal lock mass              | 391.28421                          |
| Charge state (Z)                | 2                                  |
| Resolution                      | 70,000 (17,500)                    |
| AGC target                      | 1e <sup>6</sup> (1e <sup>5</sup> ) |
| Maximum IT (ms)                 | 120 (120)                          |
| Scan range                      | 350-1800                           |
| TopN                            | 10                                 |
| Isolation window ( <i>m/z</i> ) | 3                                  |
| NCE                             | 30                                 |
| Underfill ratio (%)             | 0.3                                |
| Intensity threshold             | 2.5e <sup>3</sup>                  |
| Charge exclusion                | Unassigned, 1                      |
| Peptide match                   | On                                 |
| Dynamic exclusion (s)           | 15                                 |

Values in the parenthesis represent for MS<sup>2</sup>

AGC: Automatic gain control

IT: Ion injection time

*m/z*: mass-to-charge ratio

NCE: Normalized collision energy



(a)

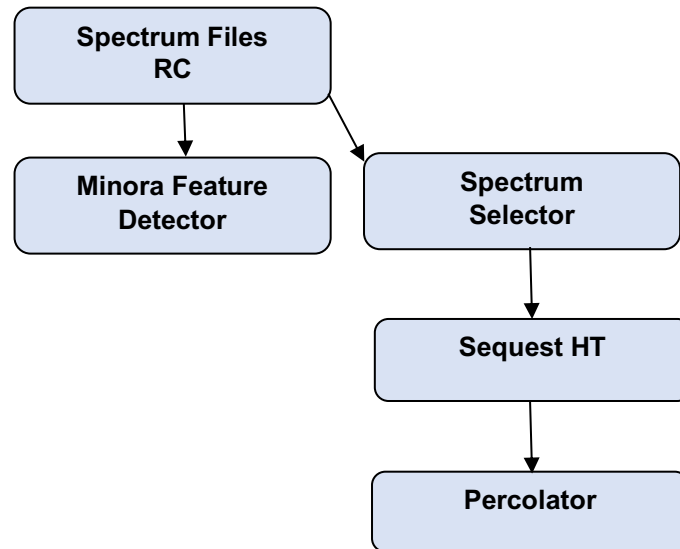

(b)

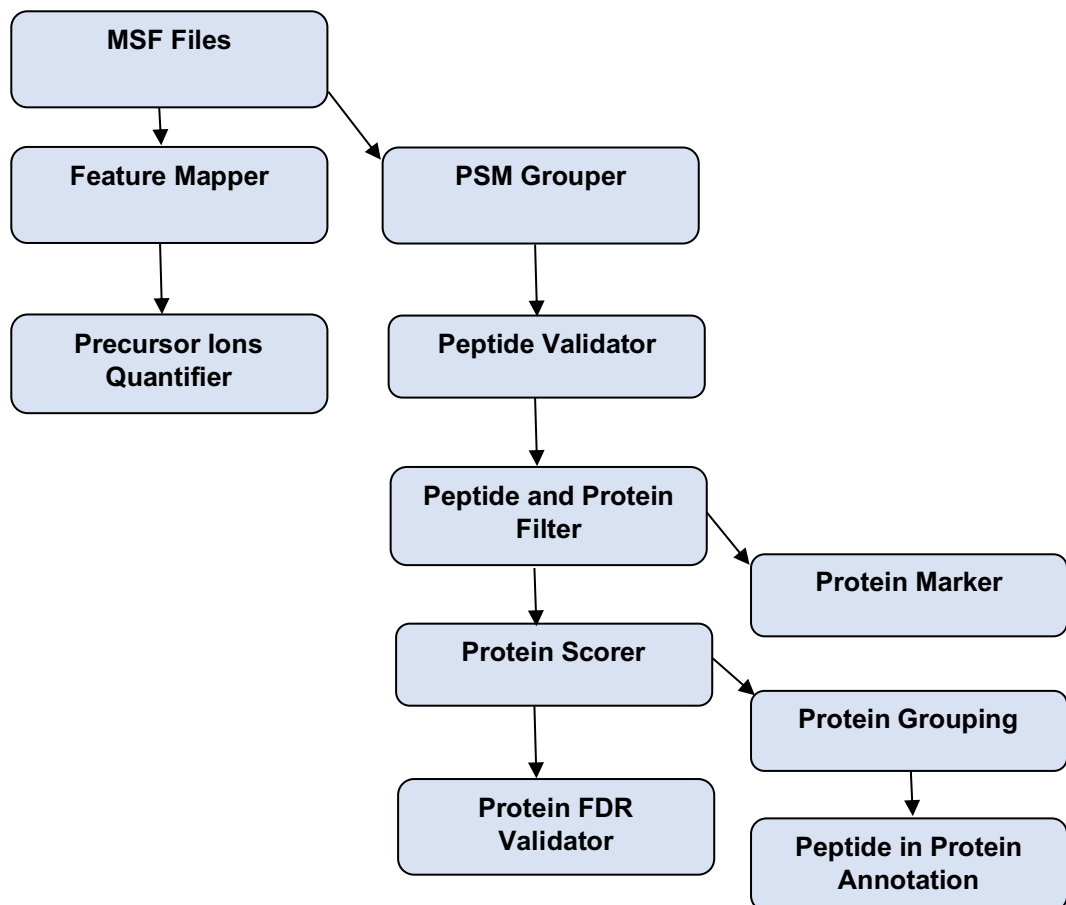

**Fig. S1** Untargeted label-free relative-quantification workflow of Proteome Discoverer (v2.2.0.388) software (a) processing workflow and (b) consensus workflow

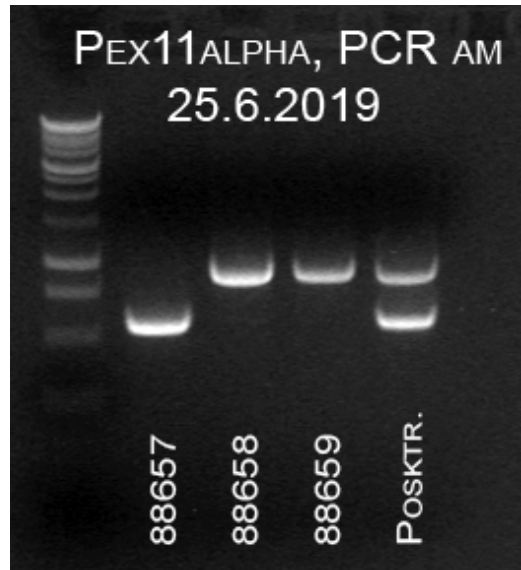

**Fig. S2** Genotypes of animals were determined by polymerase chain reaction as described previously<sup>1</sup>. Wild type (e.g. 88657) allele (*Pex11α*<sup>+/+</sup>) is amplified by primer 10 (5'-AATCAGGGACCTGTGCAACCTG-3') and primer 11 (5'-AGTACAGCGTGGCTAATGAAGAGAC-3'). Homozygous peroxisomal biogenesis factor 11α knockout (e.g. 88658 and 88659) allele (*Pex11α*<sup>-/-</sup>) is amplified by primer 10 (5'-AATCAGGGACCTGTGCAACCTG-3') and Neo primer (5'-ATATTGCTGAAGAGCTTGGCGGC-3'). Both bands (e.g. POSKTR) amplified for heterozygous animals (*Pex11α*<sup>+/-</sup>)

#### Reference

1. Li X, Baumgart E, Dong GX, Morrell JC, Jimenez-Sanchez G, Valle D, et al., PEX11alpha is required for peroxisome proliferation in response to 4-phenylbutyrate but is dispensable for peroxisome proliferator-activated receptor alpha-mediated peroxisome proliferation. *Mol Cell Biol.* 2002;22(23):8226-40

### (a) Lipidomics data

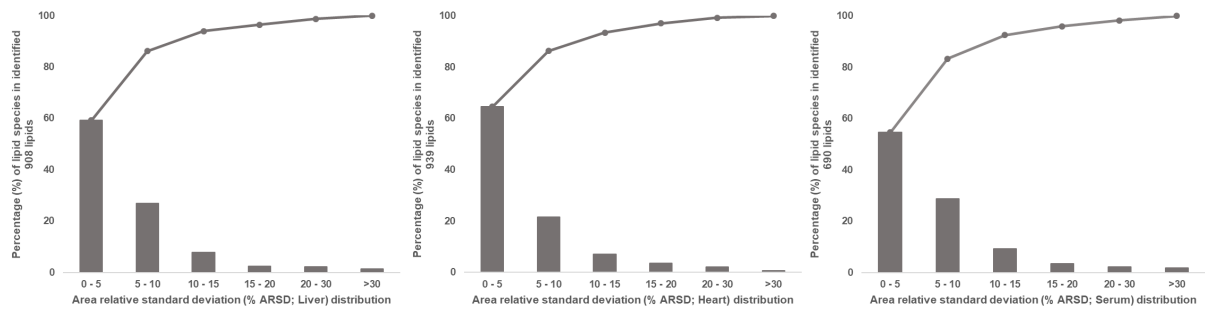

### (b) Metabolomics data

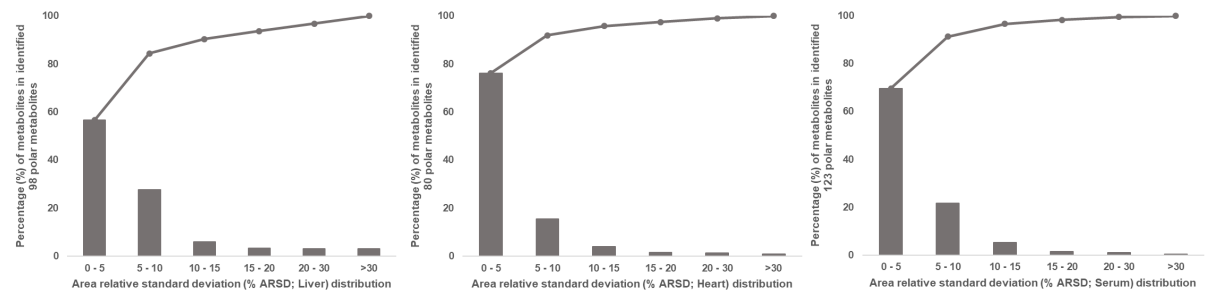

### (c) Proteomics data

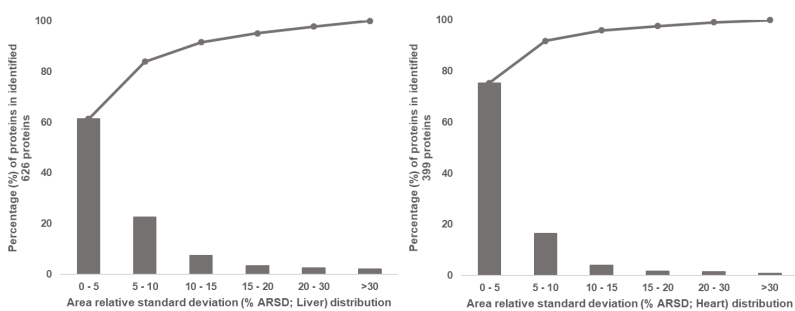

**Fig. S3** Histograms and integral of area relative standard deviation (% ARSD) values for identified (a) lipids, (b) polar metabolites and (c) proteins in liver (left column), heart (middle column) and serum (right column, except for proteomics data) across all replicates

(a)

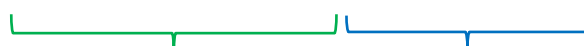

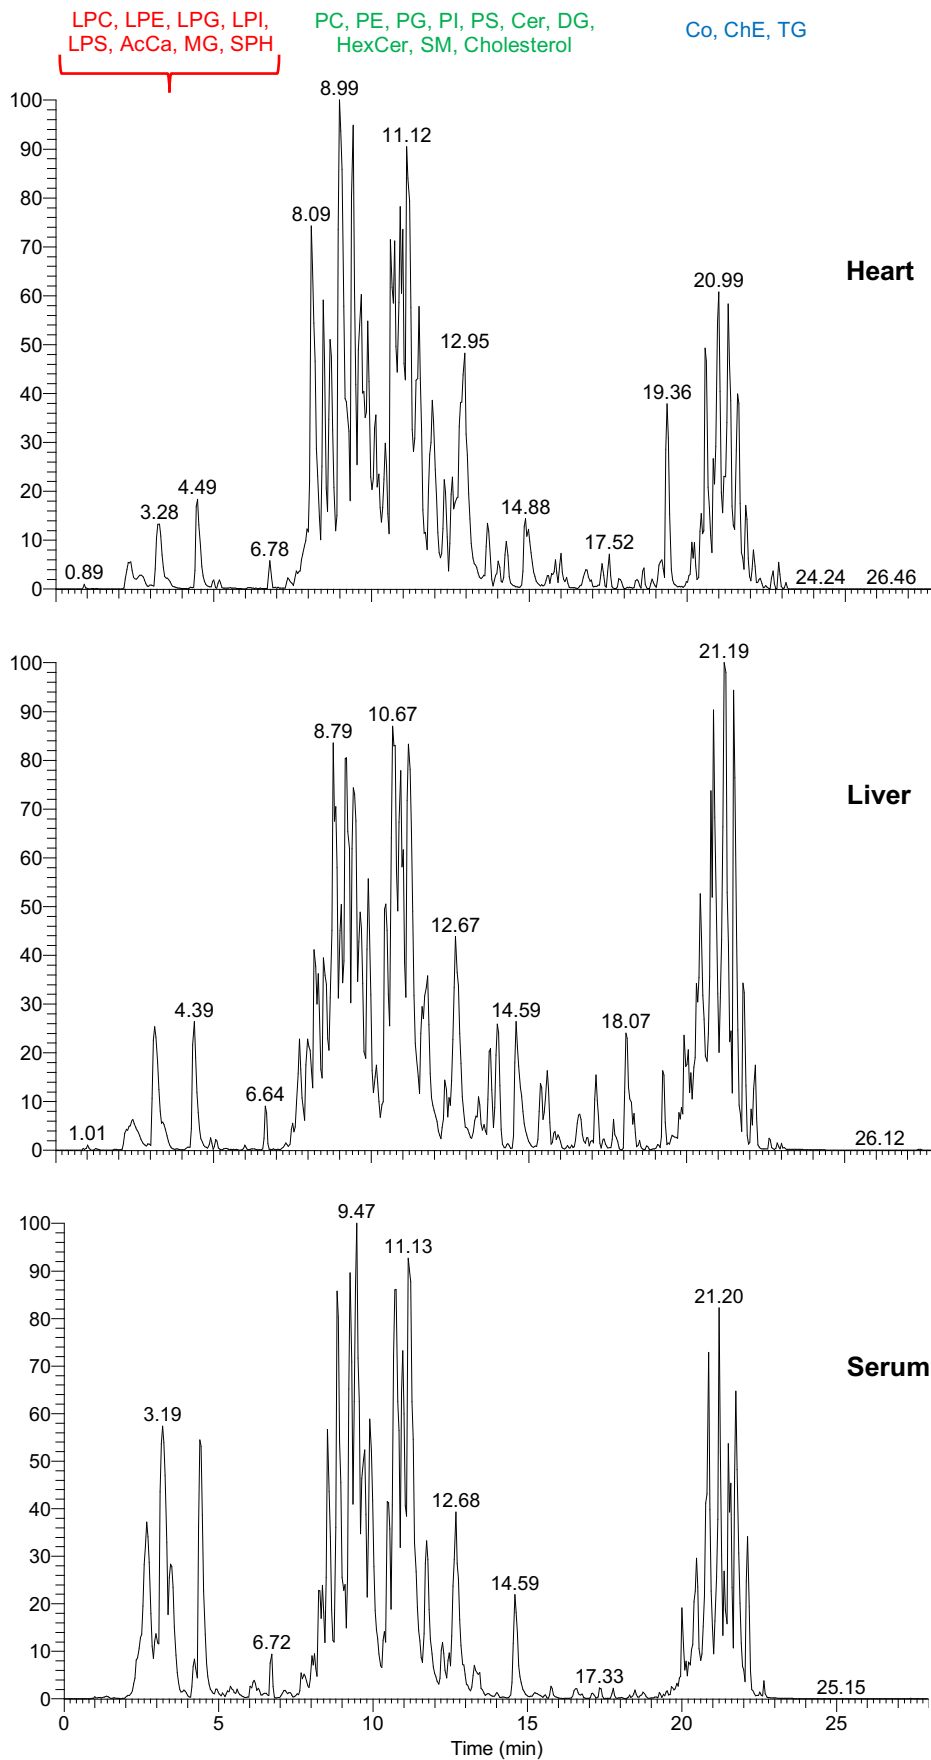

**Fig. S4 a)** Base peak chromatograms of the mouse heart, liver and serum lipideome extracted by MeOH/MTBE/H<sub>2</sub>O liquid-liquid extraction method in positive-ion mode

(b)

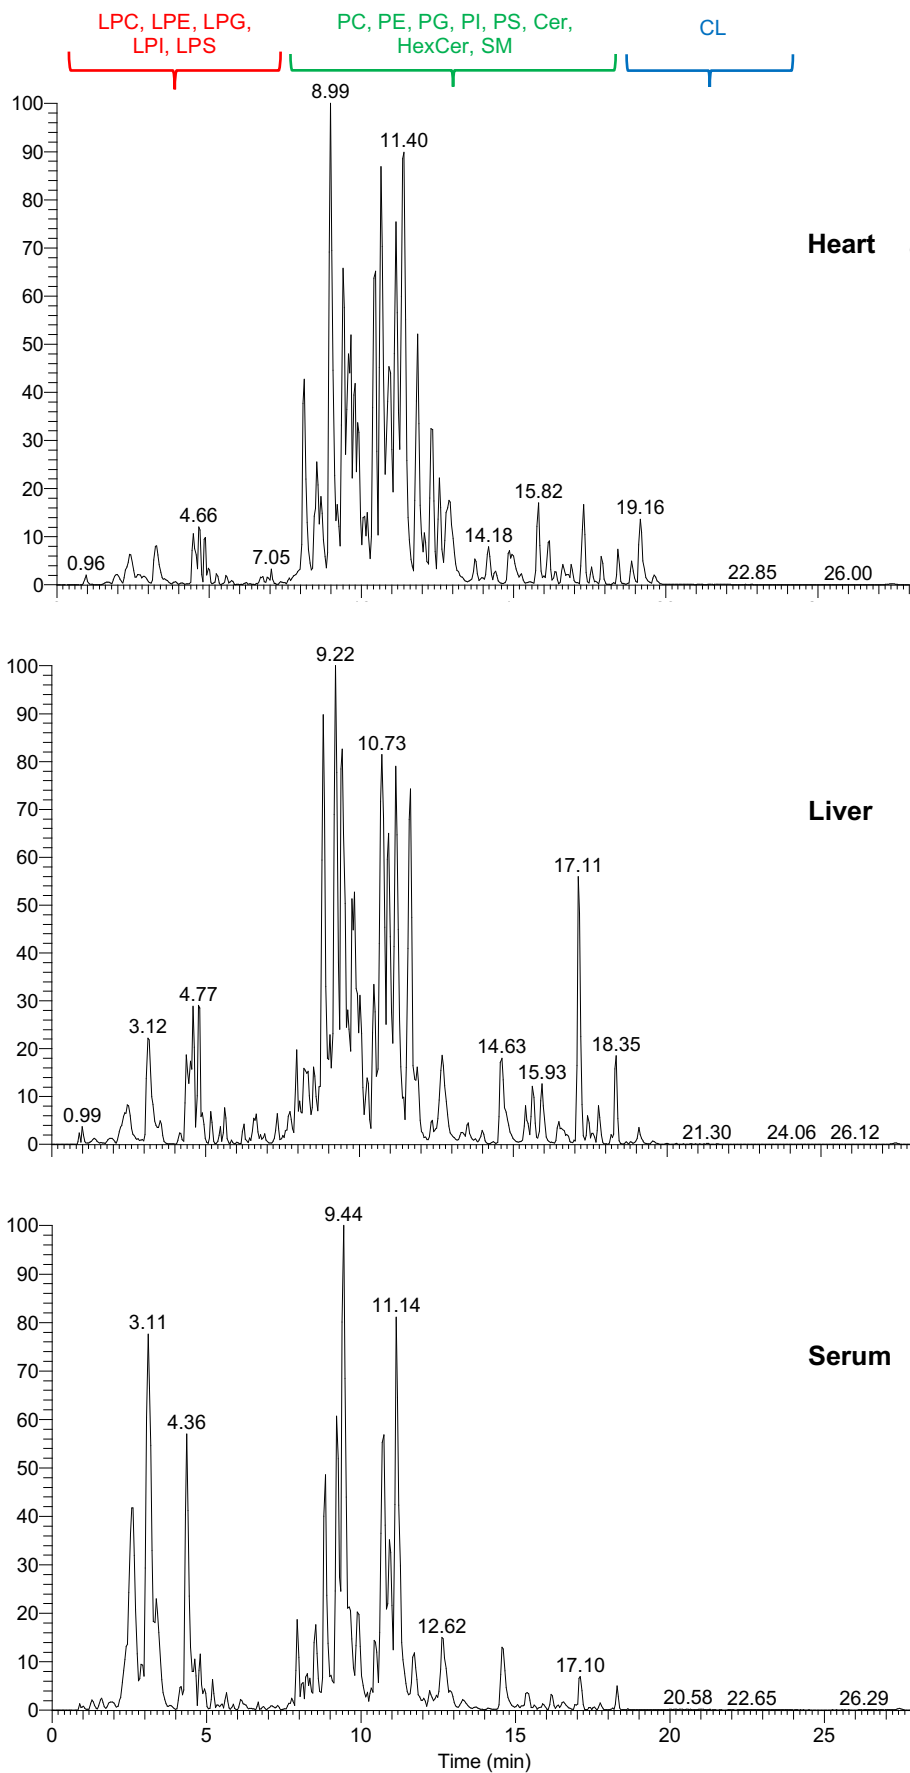

**Fig. S4 b)** Base peak chromatograms of the mouse heart, liver and serum lipidome extracted by MeOH/MTBE/H<sub>2</sub>O liquid-liquid extraction method in negative-ion mode

(a)

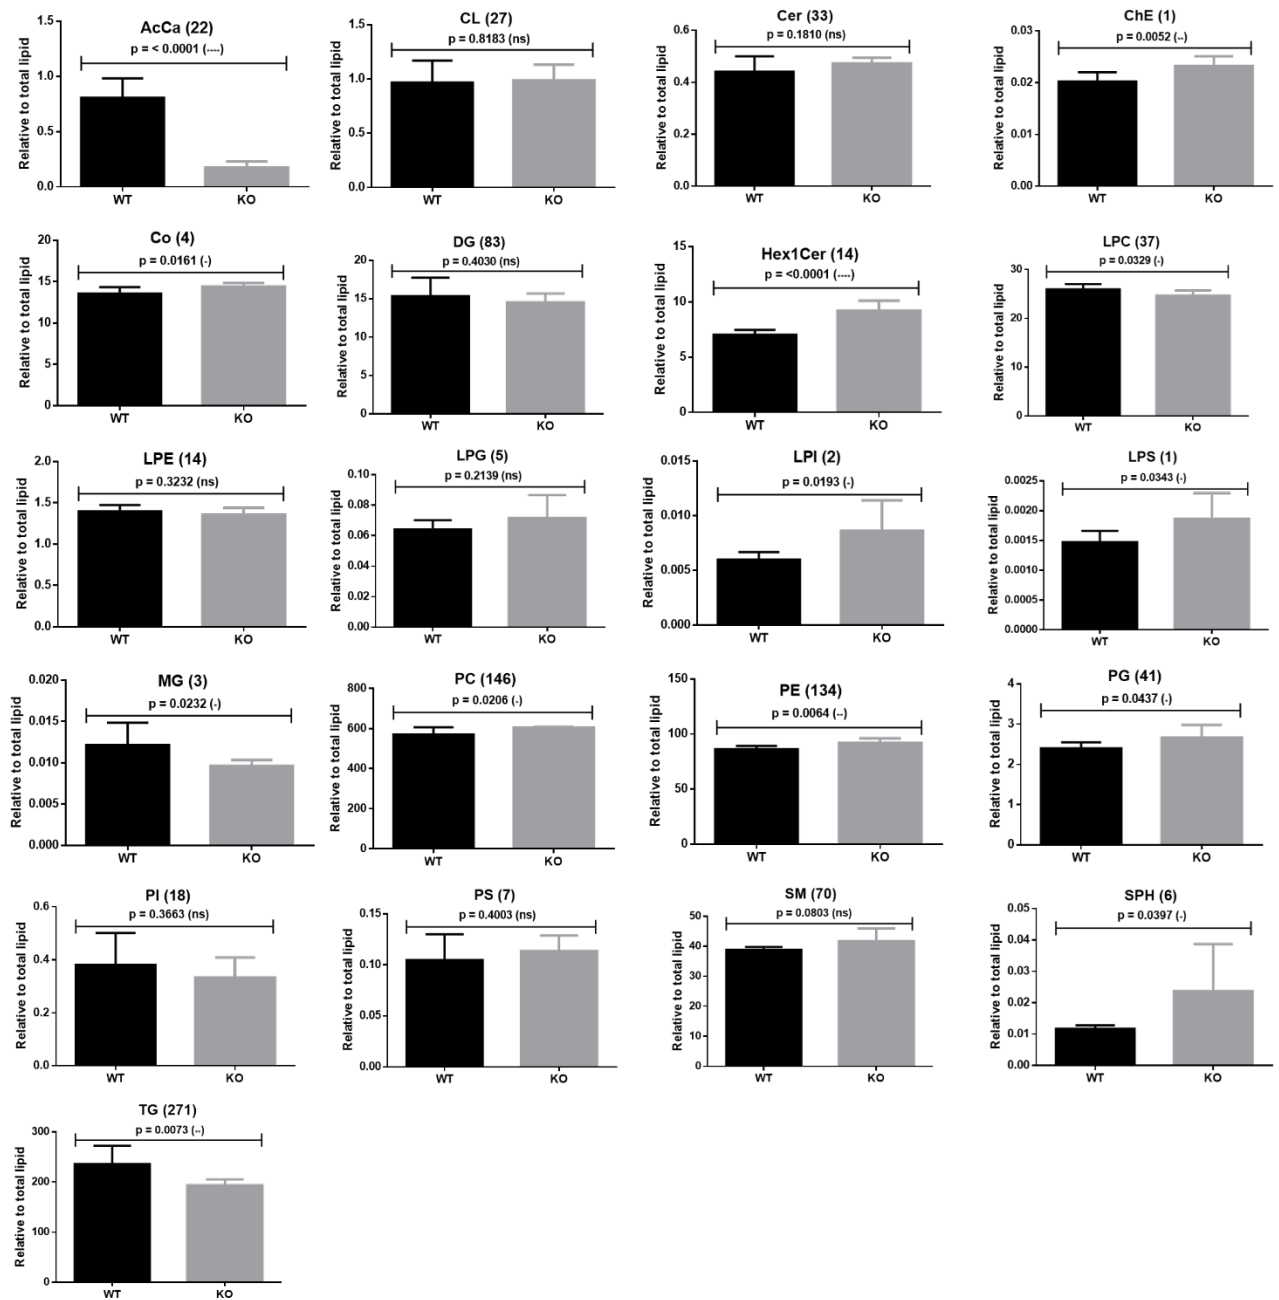

**Fig. S5 a)** Comparison of individual lipid classes (in total 21) between WT control and *Pex11a* KO mouse heart tissue homogenates. Total lipid class value represents the sum of the normalized relative abundance values of all measured lipid species in a particular lipid class (combined positive- and negative-ion mode data from three biological replicates and technical triplicates). The numbers in parenthesis denote the number of confident lipid species identifications within each lipid class. Underlying numerical data (mean values  $\pm$  standard deviation) used to generate the bar graphs is presented in the additional electronic supplementary material dataset S1 (ESM\_3), under the Microsoft Excel worksheet name\_Lipid class

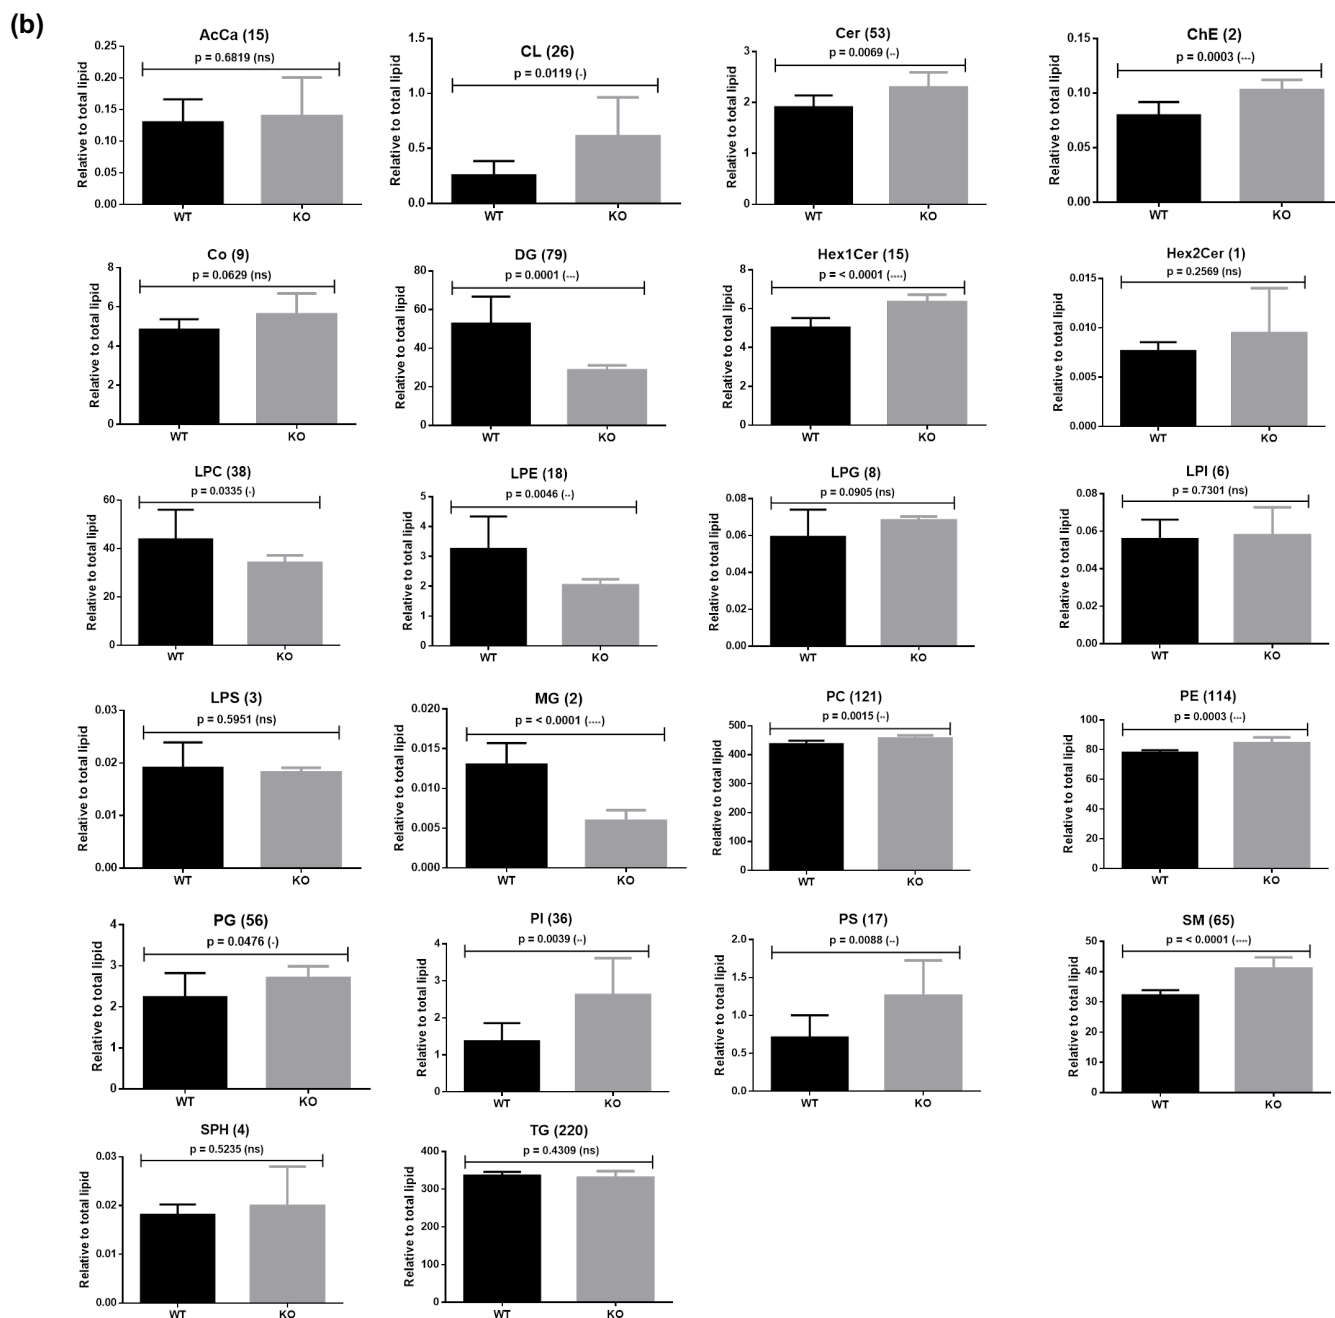

**Fig. S5 b)** Comparison of individual lipid classes (in total 22) between WT control and *Pex11α* KO mouse liver tissue homogenates. Total lipid class value represents the sum of the normalized relative abundance values of all measured lipid species in a particular lipid class (combined positive- and negative-ion mode data from three biological replicates and technical triplicates). The numbers in parenthesis denote the number of confident lipid species identifications within each lipid class. Underlying numerical data (mean values  $\pm$  standard deviation) used to generate the bar graphs is presented in the additional electronic supplementary material dataset S1 (ESM\_3), under the Microsoft Excel worksheet name\_Lipid class

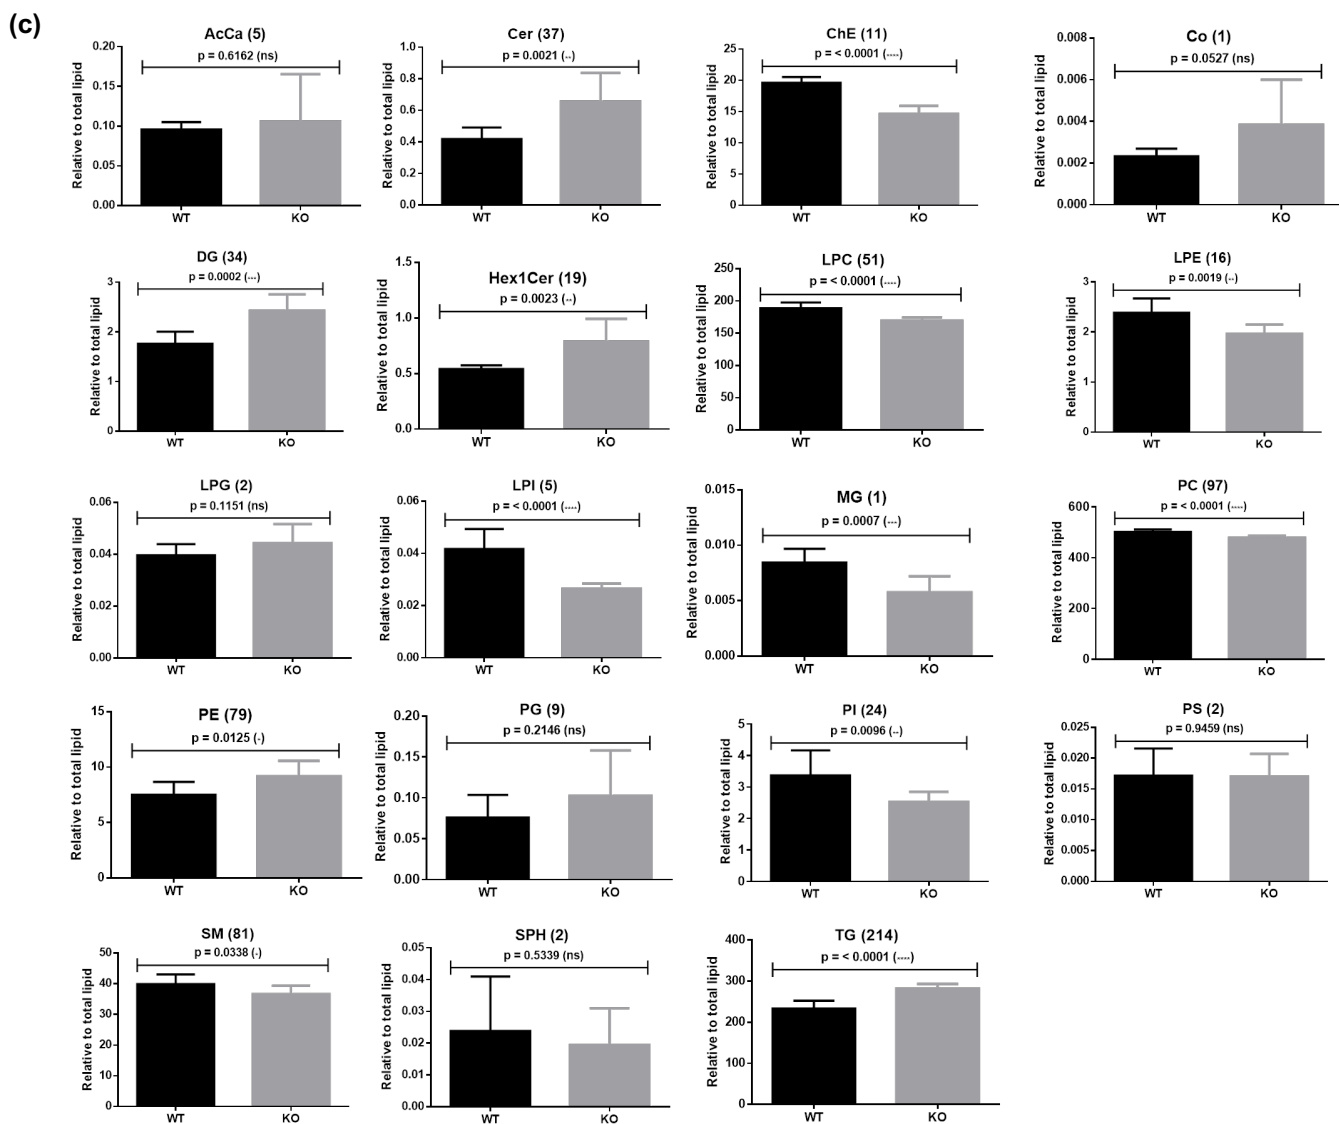

**Fig. S5 c)** Comparison of individual lipid classes (in total 19) between WT control and *Pex11a* KO mouse serum samples. Total lipid class value represents the sum of the normalized relative abundance values of all measured lipid species in a particular lipid class (combined positive- and negative-ion mode data from three biological replicates and technical triplicates). The numbers in parenthesis denote the number of confident lipid species identifications within each lipid class. Underlying numerical data (mean values  $\pm$  standard deviation) used to generate the bar graphs is presented in the additional electronic supplementary material dataset S1 (ESM\_3), under the Microsoft Excel worksheet name *\_Lipid class*



## Serum lipidome

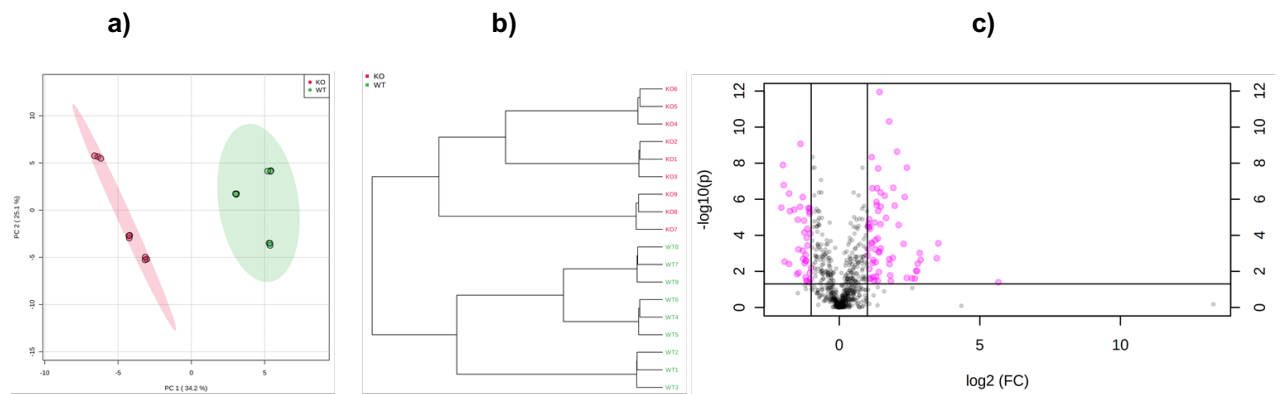

## Heart lipidome

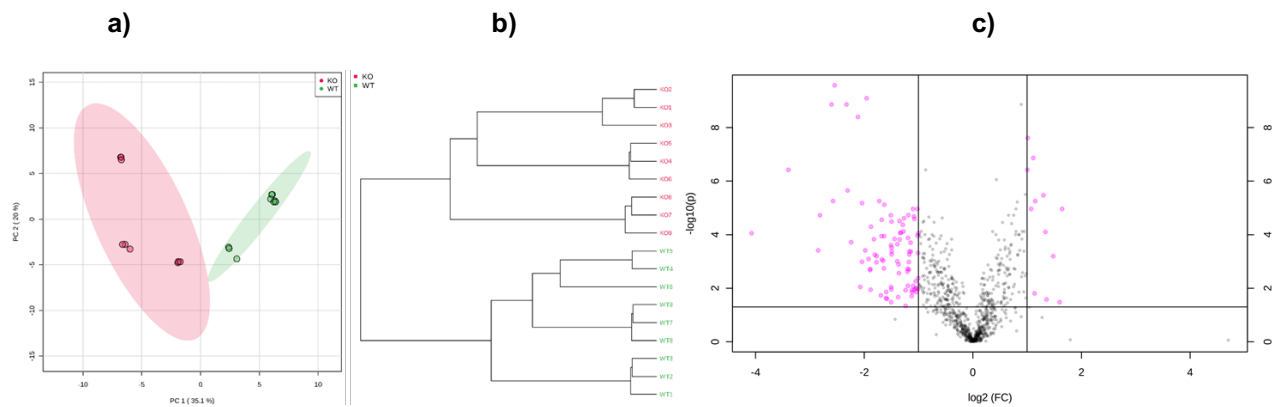

## Liver lipidome

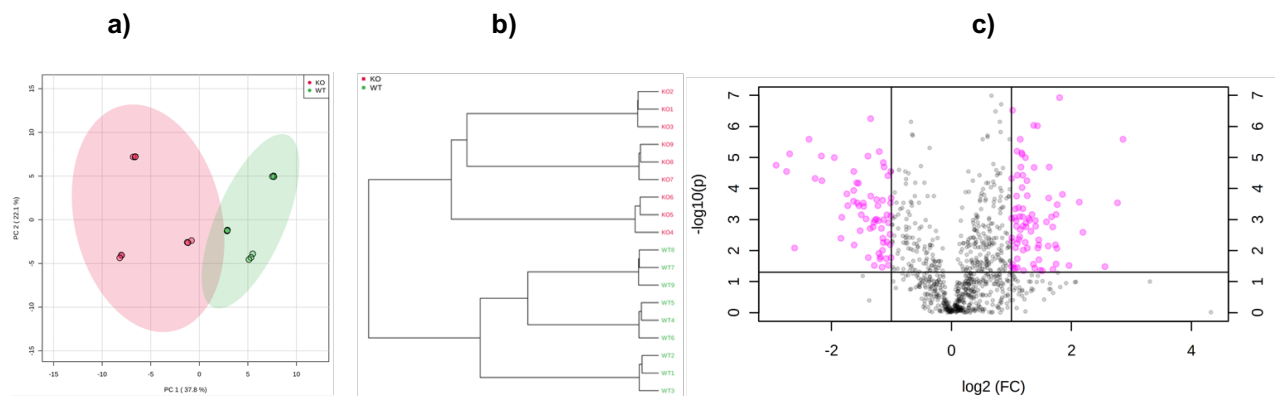

**Fig. S6** a) Principal component analysis (PCA), b) hierarchical clustering analysis (HCA; dendrogram), and c) volcano plots ( $\log_2$  fold changes versus  $-\log_{10}$  FDR adjusted p-values) analyses of lipidomics data (combined positive- and negative-ion mode data from three biological replicates and technical triplicates) obtained from WT control and *Pex11a* KO mouse serum, heart and liver tissue homogenates

**Table S12** a) Metabolic pathway analysis of combined differentially abundant lipids and polar metabolites (serum) using MetPA module of MetaboAnalyst (v4.0) web application

| Pathway                                                | Total | Expected | Hits | Raw p    | -log <sub>10</sub> p | Holm adjust | FDR     | Impact  |
|--------------------------------------------------------|-------|----------|------|----------|----------------------|-------------|---------|---------|
| Linoleic acid metabolism                               | 5     | 0.086321 | 2    | 0.002777 | 2.5564               | 0.2333      | 0.2333  | 0       |
| Glycerophospholipid metabolism                         | 36    | 0.62151  | 3    | 0.022363 | 1.6505               | 1           | 0.88296 | 0.21631 |
| Tryptophan metabolism                                  | 41    | 0.70784  | 3    | 0.031534 | 1.5012               | 1           | 0.88296 | 0.23722 |
| Cysteine and methionine metabolism                     | 33    | 0.56972  | 2    | 0.10918  | 0.96185              | 1           | 1       | 0.02659 |
| Arachidonic acid metabolism                            | 36    | 0.62151  | 2    | 0.12628  | 0.89866              | 1           | 1       | 0       |
| Tyrosine metabolism                                    | 42    | 0.7251   | 2    | 0.16222  | 0.7899               | 1           | 1       | 0.02559 |
| alpha-Linolenic acid metabolism                        | 13    | 0.22444  | 1    | 0.20333  | 0.69181              | 1           | 1       | 0       |
| Glycosylphosphatidylinositol (GPI)-anchor biosynthesis | 14    | 0.2417   | 1    | 0.2172   | 0.66314              | 1           | 1       | 0.00399 |
| Glycerolipid metabolism                                | 16    | 0.27623  | 1    | 0.24425  | 0.61216              | 1           | 1       | 0.01402 |
| Sphingolipid metabolism                                | 21    | 0.36255  | 1    | 0.30801  | 0.51143              | 1           | 1       | 0.03854 |
| Purine metabolism                                      | 66    | 1.1394   | 2    | 0.31679  | 0.49923              | 1           | 1       | 0.02416 |
| Alanine, aspartate and glutamate metabolism            | 28    | 0.4834   | 1    | 0.38865  | 0.41044              | 1           | 1       | 0.04808 |
| Glycine, serine and threonine metabolism               | 34    | 0.58699  | 1    | 0.4505   | 0.3463               | 1           | 1       | 0.04655 |
| Steroid biosynthesis                                   | 42    | 0.7251   | 1    | 0.52368  | 0.28093              | 1           | 1       | 0       |
| Primary bile acid biosynthesis                         | 46    | 0.79416  | 1    | 0.55666  | 0.25441              | 1           | 1       | 0       |
| Aminoacyl-tRNA biosynthesis                            | 48    | 0.82869  | 1    | 0.57231  | 0.24237              | 1           | 1       | 0       |

**Table S12 b)** Metabolic pathway analysis of combined differentially abundant lipids and polar metabolites (liver) using MetPA module of MetaboAnalyst (v4.0) web application

| Pathway                                                | Total | Expected | Hits | Raw p    | -log10 p | Holm adjust | FDR     | Impact  |
|--------------------------------------------------------|-------|----------|------|----------|----------|-------------|---------|---------|
| Glycerophospholipid metabolism                         | 36    | 0.50199  | 4    | 0.001234 | 2.9089   | 0.10361     | 0.10361 | 0.26332 |
| Sphingolipid metabolism                                | 21    | 0.29283  | 3    | 0.002647 | 2.5772   | 0.21971     | 0.11118 | 0.30832 |
| Lysine degradation                                     | 25    | 0.34861  | 2    | 0.045823 | 1.3389   | 1           | 1       | 0.14554 |
| Linoleic acid metabolism                               | 5     | 0.069721 | 1    | 0.067891 | 1.1682   | 1           | 1       | 0       |
| alpha-Linolenic acid metabolism                        | 13    | 0.18127  | 1    | 0.16747  | 0.77606  | 1           | 1       | 0       |
| Glycosylphosphatidylinositol (GPI)-anchor biosynthesis | 14    | 0.19522  | 1    | 0.17918  | 0.74671  | 1           | 1       | 0.00399 |
| Pantothenate and CoA biosynthesis                      | 19    | 0.26494  | 1    | 0.23542  | 0.62816  | 1           | 1       | 0.02857 |
| beta-Alanine metabolism                                | 21    | 0.29283  | 1    | 0.25687  | 0.59029  | 1           | 1       | 0.10448 |
| Cysteine and methionine metabolism                     | 33    | 0.46016  | 1    | 0.37401  | 0.42711  | 1           | 1       | 0       |
| Glycine, serine and threonine metabolism               | 34    | 0.4741   | 1    | 0.38294  | 0.41687  | 1           | 1       | 0.04655 |
| Arachidonic acid metabolism                            | 36    | 0.50199  | 1    | 0.40043  | 0.39748  | 1           | 1       | 0       |
| Arginine and proline metabolism                        | 38    | 0.52988  | 1    | 0.41744  | 0.37941  | 1           | 1       | 0       |
| Pyrimidine metabolism                                  | 39    | 0.54382  | 1    | 0.42577  | 0.37082  | 1           | 1       | 0.01318 |
| Tryptophan metabolism                                  | 41    | 0.57171  | 1    | 0.4421   | 0.35448  | 1           | 1       | 0.03991 |
| Primary bile acid biosynthesis                         | 46    | 0.64143  | 1    | 0.48101  | 0.31785  | 1           | 1       | 0.02285 |

**Table S12 c)** Metabolic pathway analysis of combined differentially abundant lipids and polar metabolites (heart) using MetPA module of MetaboAnalyst (v4.0) web application

| Pathway                                                | Total | Expected | Hits | Raw p     | -log10 p | Holm adjust | FDR     | Impact  |
|--------------------------------------------------------|-------|----------|------|-----------|----------|-------------|---------|---------|
| Glycerophospholipid metabolism                         | 36    | 0.28685  | 3    | 0.0023819 | 2.6231   | 0.20008     | 0.91856 | 0.21631 |
| Arginine and proline metabolism                        | 38    | 0.30279  | 2    | 0.034898  | 1.4572   | 1           | 0.91856 | 0       |
| Linoleic acid metabolism                               | 5     | 0.039841 | 1    | 0.039262  | 1.406    | 1           | 0.91856 | 0       |
| Vitamin B6 metabolism                                  | 9     | 0.071713 | 1    | 0.069649  | 1.1571   | 1           | 1       | 0       |
| alpha-Linolenic acid metabolism                        | 13    | 0.10359  | 1    | 0.099152  | 1.0037   | 1           | 1       | 0       |
| Glycosylphosphatidylinositol (GPI)-anchor biosynthesis | 14    | 0.11155  | 1    | 0.10639   | 0.97309  | 1           | 1       | 0.00399 |
| Starch and sucrose metabolism                          | 15    | 0.11952  | 1    | 0.11358   | 0.9447   | 1           | 1       | 0.08784 |
| beta-Alanine metabolism                                | 21    | 0.16733  | 1    | 0.1556    | 0.80799  | 1           | 1       | 0.05597 |
| Glutathione metabolism                                 | 28    | 0.22311  | 1    | 0.20232   | 0.69397  | 1           | 1       | 0       |
| Cysteine and methionine metabolism                     | 33    | 0.26295  | 1    | 0.23422   | 0.63038  | 1           | 1       | 0.02089 |
| Glycine, serine and threonine metabolism               | 34    | 0.27092  | 1    | 0.24046   | 0.61896  | 1           | 1       | 0.04655 |
| Arachidonic acid metabolism                            | 36    | 0.28685  | 1    | 0.25279   | 0.59723  | 1           | 1       | 0       |
| Fatty acid degradation                                 | 39    | 0.31076  | 1    | 0.27096   | 0.5671   | 1           | 1       | 0       |

### Serum metabolome

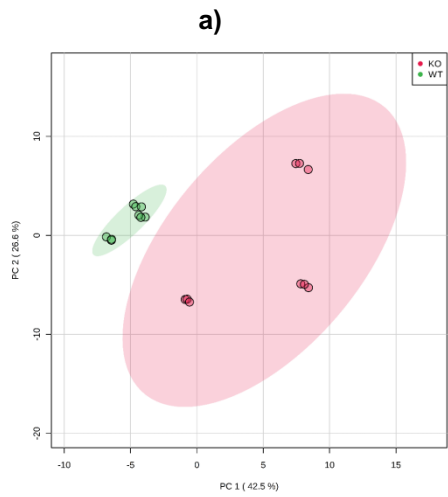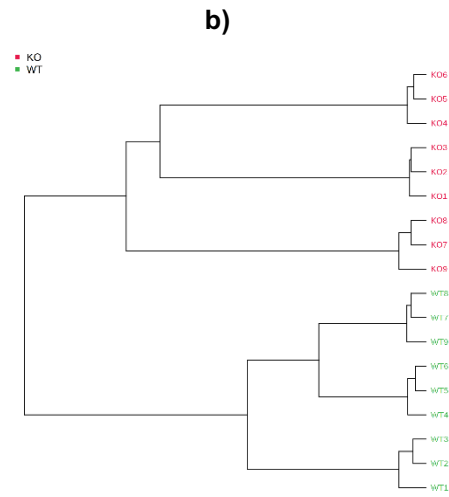

### Liver metabolome

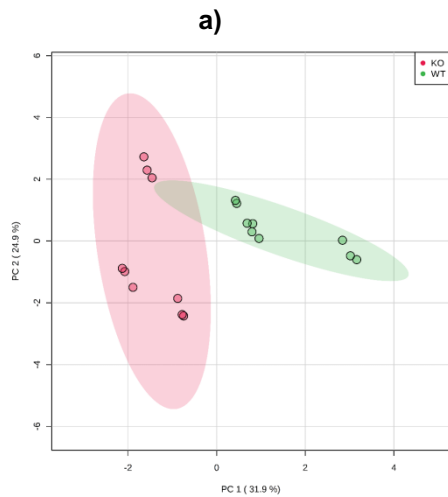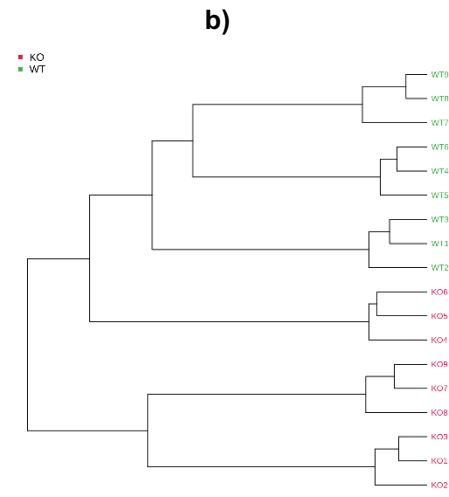

### Heart metabolome

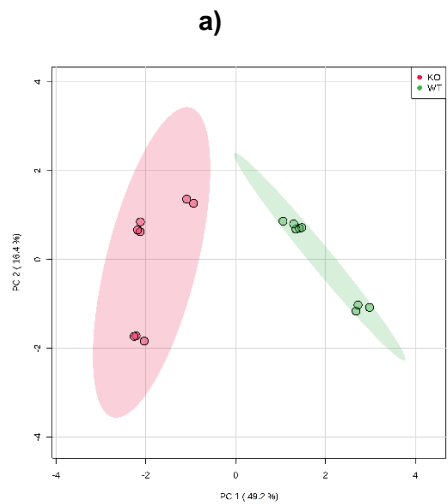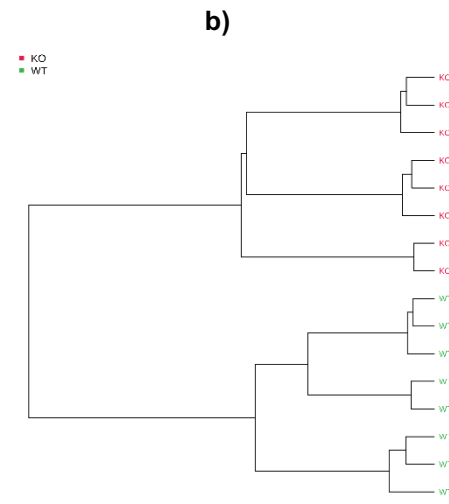

**Fig. S7** a) Principal component analysis (PCA), b) hierarchical clustering analysis (HCA; dendrogram) of metabolomics data (combined positive- and negative-ion mode data from three biological replicates and technical triplicates) obtained from WT control and *Pex11a* KO mouse serum, liver and heart tissue homogenates
