# Supplementary material for: Sequential lipidomic, metabolomic, and proteomic analyses of serum, liver, and heart tissue specimens from peroxisomal biogenesis factor 11α knockout mice
Source: PubMed Central journal article supplement (PMC8821073; doi:10.1007/s00216-021-03860-0), 2022-01-27
Supplement: 216_2021_3860_MOESM2_ESM.pdf [file 216_2021_3860_MOESM2_ESM.pdf]

**Electronic Supplementary Material\_2; Data file S1**

**Sequential lipidomic, metabolomic and proteomic analyses of serum, liver and heart tissue specimens from peroxisomal biogenesis factor 11 $\alpha$  knockout mice**

Vannuruswamy Garikapati<sup>1,2</sup>, Claudia Colasante<sup>2</sup>, Eveline Baumgart-Vogt<sup>2\*</sup>, Bernhard Spengler<sup>1\*</sup>

<sup>1</sup>Institute of Inorganic and Analytical Chemistry, Justus Liebig University Giessen, 35392 Giessen, Germany

<sup>2</sup>Institute for Anatomy and Cell Biology II, Division of Medical Cell Biology, Justus Liebig University Giessen, 35392 Giessen, Germany

## Details on lipid identification and relative-quantification by LipidSearch (v4.2.23) software<sup>1,2</sup>

### Manual curation criteria

- Mass accuracy ( $MS \leq 5$  ppm and  $MS/MS \leq 5$  ppm)
- Confirmation of lipid identifications with multiple ion adducts and their diagnostic fragment ions (lipid class-specific fragments and lipid species-specific fragments) in both positive- and negative-ion mode<sup>3-5</sup>
- Fragmentation grade (identification level A, B and/or C)
- Base retention time window of lipid classes (as shown in ESM\_1; Fig. S4)
- Isotopic profile and fatty acid distribution pattern
- Peak shape and quality
- Chromatographic peak integration and reassignment
- Fragmentation match score (m-score), c-score and t-score
- Area relative standard deviation (as shown in ESM\_1; Fig. S3) and signal-to-noise ratio

### References

1. Peake DA et al., Processing of a complex lipid dataset for the NIST inter-laboratory comparison exercise for lipidomics measurements in human serum and plasma. ASMS 2015 Poster
2. Kiyonami R, Peake DA et al., Large scale lipid profiling of a human serum lipidome using a high-resolution accurate-mass LC/MS/MS approach. LIPID MAPS Annual Meeting 2015 Poster
3. Murphy RC. Tandem mass spectrometry of lipids: molecular analysis of complex lipids. Royal Society of Chemistry, 2014
4. Lipidomics Standards Initiative guidelines (<https://lipidomics-standards-initiative.org/guidelines>)
5. Xu LN et al., Assessment of potential false positives via orbitrap-based untargeted lipidomics from rat tissues. Talanta 2018, 178, 287-293

## Chromatogram

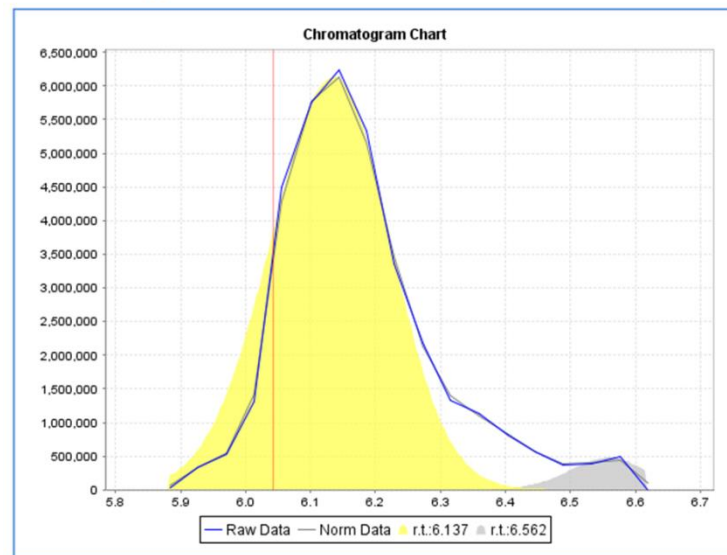

## Spectrum

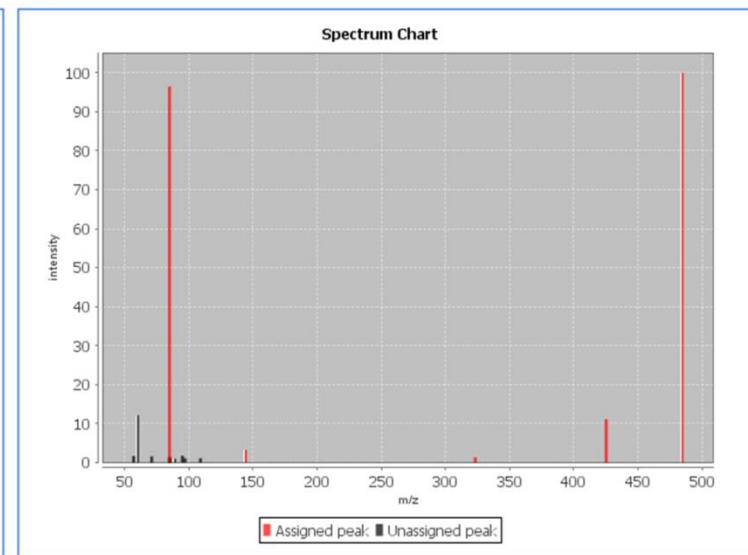

## Acylcarnitines or Carnitine esters (AcCa)

### Information

- Ionization: Positive-ion mode
- Main ion adduct used for identification:  $[M+H]^+$
- Identification (fragmentation) grade: A and B
- Main ion adduct used for quantification:  $[M+H]^+$

## Match Lipid

| LipidIon       | M-Sc. | T-Sc. | Occ. | St. |
|----------------|-------|-------|------|-----|
| ● AcCa(22:0)+H | 32.9  | 0.2   | 82.2 | ☒   |

## Match Detail

| ObsMz    | Type | It.(%) | Frag.                  | Delta(Da) |
|----------|------|--------|------------------------|-----------|
| 57.0708  | MS2  | 1.699  | -                      | -         |
| 60.0817  | MS2  | 12.188 | -                      | -         |
| 71.0864  | MS2  | 1.596  | -                      | -         |
| 85.0069  | MS2  | 1.224  | -                      | -         |
| 85.0291  | MS2  | 96.426 | NL[FA(22:0)-N(† 0.0007 |           |
| 85.0497  | MS2  | 1.516  | -                      | -         |
| 85.1019  | MS2  | 1.053  | -                      | -         |
| 89.0604  | MS2  | 1.004  | -                      | -         |
| 95.086   | MS2  | 1.772  | -                      | -         |
| 97.1016  | MS2  | 1.14   | -                      | -         |
| 109.1017 | MS2  | 1.128  | -                      | -         |
| 144.1021 | MS2  | 3.24   | NL[FA(22:0)]           | 0.0002    |
| 323.3316 | MS2  | 1.356  | FA(22:0)-OH            | 0.0008    |
| 425.3631 | MS2  | 11.138 | M+H-N(CH3)3            | 0.0005    |
| 484.4365 | MS2  | 100    | M+H                    | 0.0005    |

Representation of acylcarnitines or carnitine esters (AcCa) identification information obtained with LipidSearch software

e.g.  $[AcCa(22:0)+H]^+$

## Chromatogram

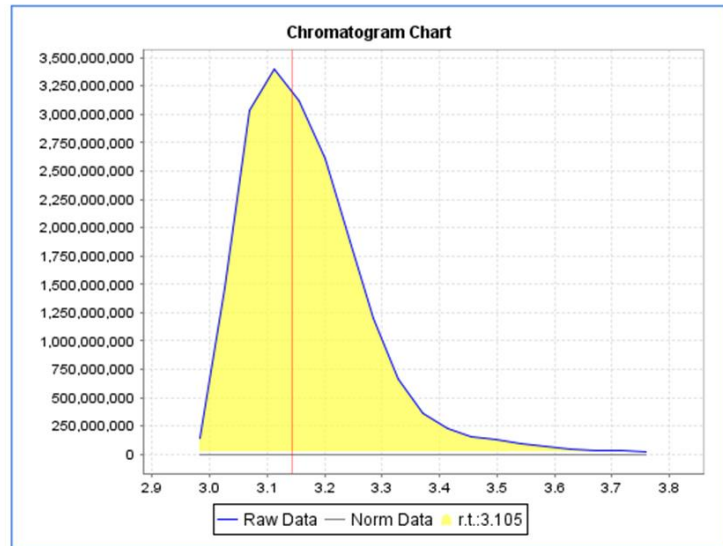

## Spectrum

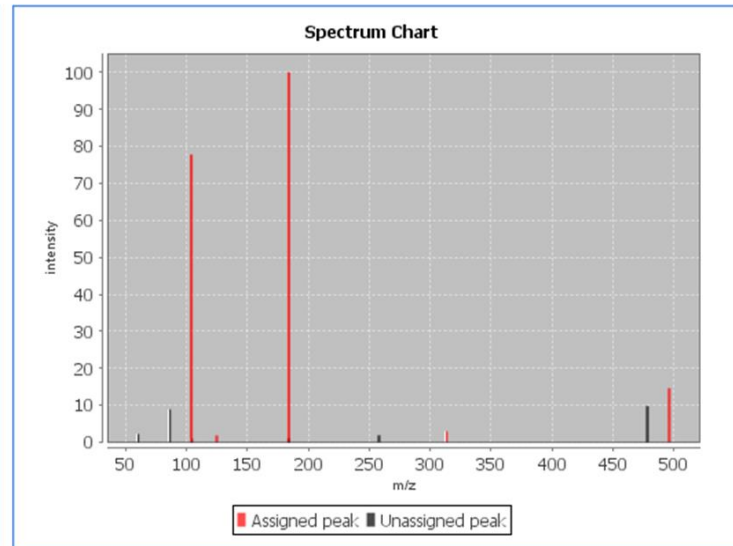

# Lysophosphatidylcholine (LPC)

## Information

- Ionization: Positive-ion mode
- Main ion adducts used for identification:  $[M+H]^+$ ,  $[M+Na]^+$  and  $[M+K]^+$
- Identification (fragmentation) grade: A and B
- Main ion adduct used for quantification:  $[M+H]^+$

## Match Lipid

| LipidIon                                     | M-Sc. | T-Sc. | Occ. | St. |
|----------------------------------------------|-------|-------|------|-----|
| <input checked="" type="radio"/> LPC(16:0)+H | 44    | 0.1   | 87.9 | ☒   |
| <input type="radio"/> PC(8:0e_8:0)+H         | 35.2  | 0.1   | 87.9 | ☒   |
| <input type="radio"/> PC(10:0e_6:0)+H        | 35.2  | 0.1   | 87.9 | ☒   |

## Match Detail

| ObsMz    | Type | It.(%) | Frag.     | Delta(Da) |
|----------|------|--------|-----------|-----------|
| 60.0818  | MS2  | 2.233  | -         | -         |
| 86.0973  | MS2  | 8.918  | -         | -         |
| 104.1076 | MS2  | 77.821 | C5H14N1O1 | 0.0007    |
| 104.137  | MS2  | 1.047  | -         | -         |
| 125.0002 | MS2  | 1.896  | C2H6O4P1  | 0.0004    |
| 184.0738 | MS2  | 100    | (P-Cho)+H | 0.0005    |
| 184.1428 | MS2  | 1.101  | -         | -         |
| 258.111  | MS2  | 1.925  | -         | -         |
| 313.2747 | MS2  | 2.973  | M+H-PC    | 0.001     |
| 478.3304 | MS2  | 9.807  | -         | -         |
| 496.3411 | MS2  | 14.628 | M+H       | 0.0013    |

Representation of lysophosphatidylcholine (LPC) identification information obtained with LipidSearch software

e.g.  $[LPC(16:0)+H]^+$

## Chromatogram

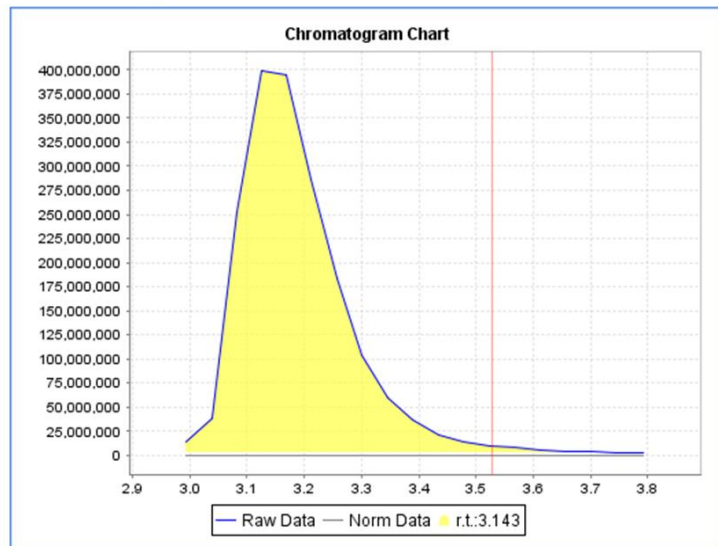

## Spectrum

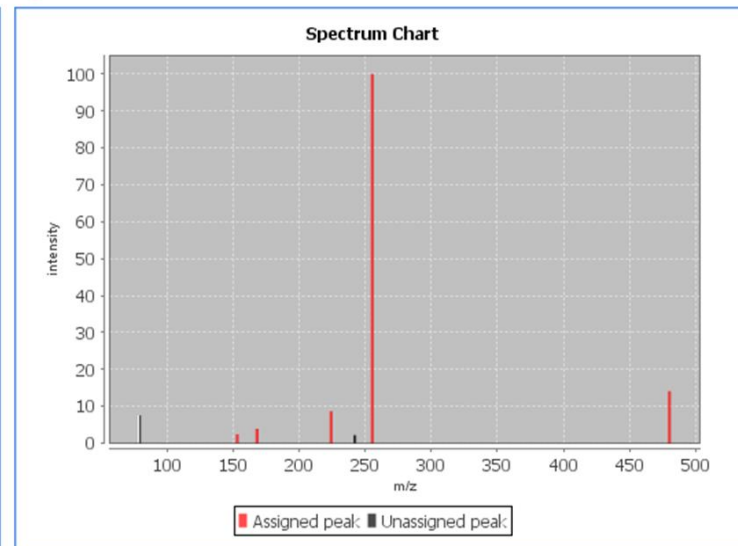

## Lysophosphatidylcholine (LPC)

### Information

- Ionization: Negative-ion mode
- Main ion adducts used for identification:  $[M+HCOO]^-$  and  $[M-CH_3]^-$
- Identification (fragmentation) grade: A and B
- Main ion adduct used for quantification:  $[M+HCOO]^-$

## Match Lipid

| LipidIon                                        | M-Sc. | T-Sc. | Occ. | St. |
|-------------------------------------------------|-------|-------|------|-----|
| <input checked="" type="radio"/> LPC(16:0)+HCOO | 46.5  | 0     | 93   | ☒   |
| <input type="radio"/> PC(8:0e_8:0)+HCOO         | 5.8   | 0     | 19.2 | ☒   |
| <input type="radio"/> PC(10:0e_6:0)+HCOO        | 5.8   | 0     | 19.2 | ☒   |

## Match Detail

| ObsMz    | Type | It.(%) | Frag.          | Delta(Da) |
|----------|------|--------|----------------|-----------|
| 78.9573  | MS2  | 7.528  | -              | -         |
| 152.9947 | MS2  | 2.436  | GP-H3O         | -0.0012   |
| 168.042  | MS2  | 3.925  | (P-Cho)-CH3-H  | -0.0011   |
| 224.0689 | MS2  | 8.675  | M-FA(16:0)-CH3 | -0.0005   |
| 242.0801 | MS2  | 2.178  | -              | -         |
| 255.233  | MS2  | 100    | FA(16:0)-H     | 0.0001    |
| 480.3102 | MS2  | 14.119 | M-CH3          | 0.0007    |

Representation of lysophosphatidylcholine (LPC) identification information obtained with LipidSearch software  
e.g.  $[LPC(16:0)+HCOO]^-$

# Ceramides (Cer)

## Chromatogram

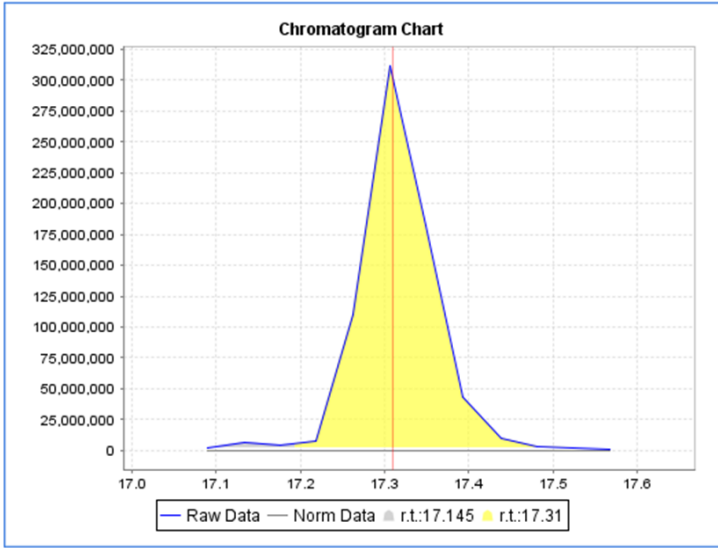

## Spectrum

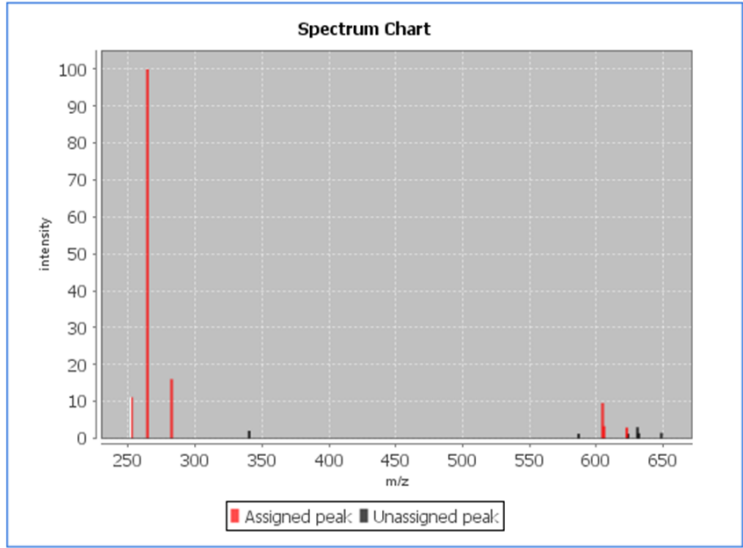

### Information

- Ionization: Positive-ion mode
- Main ion adducts used for identification:  $[M+H]^+$ ,  $[M+H-H_2O]^+$  and  $[M+H-2H_2O]^+$
- Identification (fragmentation) grade: A , B and C
- Main ion adduct used for quantification:  $[M+H]^+$

## Match Lipid

| LipidIon                                           | M-Sc. | T-Sc. | Occ. | St.                      |
|----------------------------------------------------|-------|-------|------|--------------------------|
| <input checked="" type="radio"/> Cer(d18:1_22:0)+H | 37.5  | 0.7   | 93.8 | <input type="checkbox"/> |
| <input type="radio"/> Cer(t18:0_22:0)+H-H2O        | 25.5  | 1.4   | 85.1 | <input type="checkbox"/> |
| <input type="radio"/> Cer(d17:0_23:1)+H            | 3.2   | 0.7   | 16.1 | <input type="checkbox"/> |
| <input type="radio"/> Cer(m17:1_23:0+O)+H          | 3.2   | 0.7   | 16.1 | <input type="checkbox"/> |
| <input type="radio"/> Cer(d22:0_18:1)+H            | 2     | 0.7   | 10   | <input type="checkbox"/> |
| <input type="radio"/> Cer(m22:1_18:0+O)+H          | 2     | 0.7   | 10   | <input type="checkbox"/> |

## Match Detail

| ObsMz    | Type | It.(%) | Frag.                 | Delta(Da) |
|----------|------|--------|-----------------------|-----------|
| 252.2692 | MS2  | 11.168 | SPH(d18:1)+H-H2O-CH2O | 0.0006    |
| 264.2691 | MS2  | 100    | SPH(d18:1)+H-2H2O     | 0.0006    |
| 282.2799 | MS2  | 16.076 | SPH(d18:1)+H-H2O      | 0.0007    |
| 340.3584 | MS2  | 2.077  | -                     | -         |
| 586.5937 | MS2  | 1.283  | -                     | -         |
| 604.6048 | MS2  | 9.587  | NL[H2O]               | 0.0021    |
| 605.6079 | MS2  | 3.334  | NL[H2O] [isotope]     | 1.0052    |
| 622.6149 | MS2  | 2.921  | M+H                   | 0.0016    |
| 623.6176 | MS2  | 1.264  | -                     | -         |
| 630.6202 | MS2  | 3.034  | -                     | -         |
| 631.6215 | MS2  | 1.418  | -                     | -         |
| 648.6301 | MS2  | 1.506  | -                     | -         |

Copy

Representation of ceramides (Cer) identification information obtained with LipidSearch software e.g.  $[Cer(d40:1)+H]^+$

# Ceramides (Cer)

## Information

- Ionization: Negative-ion mode
- Main ion adducts used for identification:  $[M+HCOO]^-$  and  $[M-H]^-$
- Identification (fragmentation) grade: A, B and C
- Main ion adduct used for quantification:  $[M+HCOO]^-$

## Chromatogram

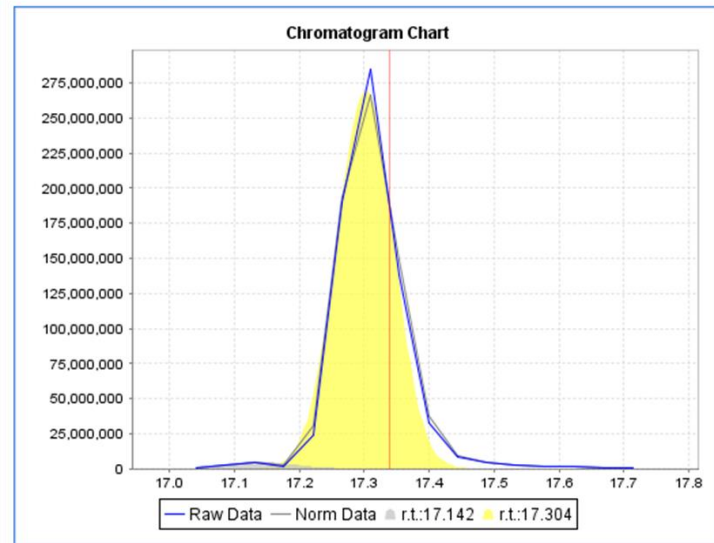

## Spectrum

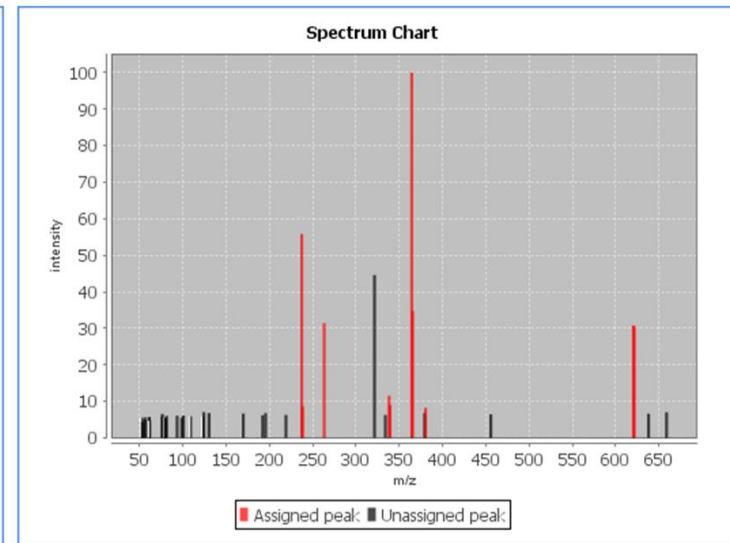

## Match Lipid

| LipidIon                                              | M-Sc. | T-Sc. | Occ. | St.                      |
|-------------------------------------------------------|-------|-------|------|--------------------------|
| <input checked="" type="radio"/> Cer(d18:1_22:0)+HCOO | 35.7  | 0     | 59.5 | <input type="checkbox"/> |
| <input type="radio"/> Cer(d16:0_24:1)+HCOO            | 19.9  | 0     | 49.8 | <input type="checkbox"/> |
| <input type="radio"/> Cer(d15:0_25:1)+HCOO            | 7.3   | 0     | 36.4 | <input type="checkbox"/> |
| <input type="radio"/> Cer(d15:1_25:0)+HCOO            | 7.3   | 0     | 36.4 | <input type="checkbox"/> |
| <input type="radio"/> Cer(d18:0_22:1)+HCOO            | 6.4   | 0     | 21.2 | <input type="checkbox"/> |
| <input type="radio"/> Cer(d24:0_16:1)+HCOO            | 4.7   | 0     | 23.3 | <input type="checkbox"/> |
| <input type="radio"/> Cer(d22:0_18:1)+HCOO            | 3.9   | 0     | 19.7 | <input type="checkbox"/> |
| <input type="radio"/> Cer(d24:1_16:0)+HCOO            | 3.9   | 0     | 19.7 | <input type="checkbox"/> |
| <input type="radio"/> Cer(d17:1_23:0)+HCOO            | 3     | 0     | 15.2 | <input type="checkbox"/> |
| <input type="radio"/> Cer(m18:1_22:0+O)+HCOO          | 2.6   | 0     | 12.9 | <input type="checkbox"/> |

## Match Detail

| ObsMz    | Type | It.(%) | Frag.                   | Delta(Da) |
|----------|------|--------|-------------------------|-----------|
| 195.5036 | MS2  | 6.801  | -                       | -         |
| 218.9571 | MS2  | 6.297  | -                       | -         |
| 237.2228 | MS2  | 55.795 | Frag[d18:1]-H           | 0.0004    |
| 238.2263 | MS2  | 8.554  | Frag[d18:1]-H [i: 1.004 |           |
| 263.2387 | MS2  | 31.44  | NL[H2O,FAmidc           | 0.0006    |
| 321.3167 | MS2  | 44.586 | -                       | -         |
| 333.8749 | MS2  | 6.308  | -                       | -         |
| 338.3446 | MS2  | 11.552 | FAmide(22:0)-H          | 0.0017    |
| 339.3287 | MS2  | 8.98   | FAmide(22:0)-H          | 0.9859    |
| 364.36   | MS2  | 100    | NL[d18:1,H2O]           | 0.0015    |
| 365.363  | MS2  | 34.747 | NL[d18:1,H2O]           | 1.0046    |
| 379.3787 | MS2  | 6.797  | -                       | -         |
| 380.3534 | MS2  | 8.25   | NL[d18:1,H2]            | 0         |
| 455.8556 | MS2  | 6.503  | -                       | -         |
| 620.6018 | MS2  | 30.8   | M-H                     | 0.0031    |

Copy

Representation of ceramides (Cer) identification information obtained with LipidSearch software e.g.  $[Cer(d40:1)+HCOO]^-$

## Chromatogram

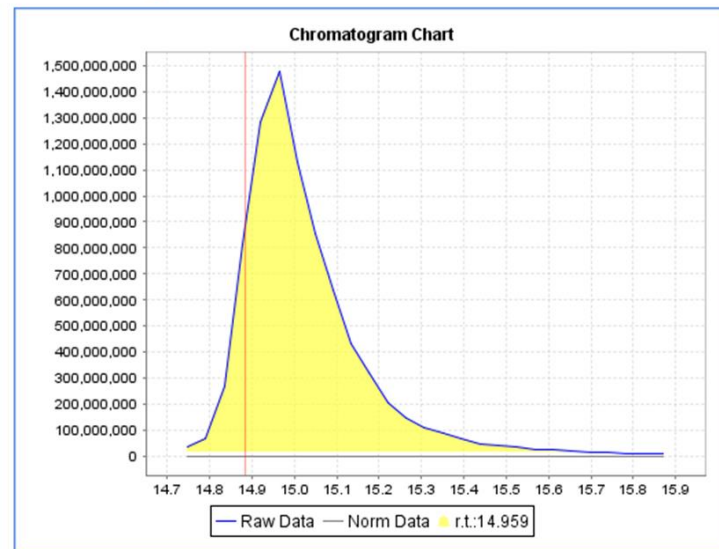

## Spectrum

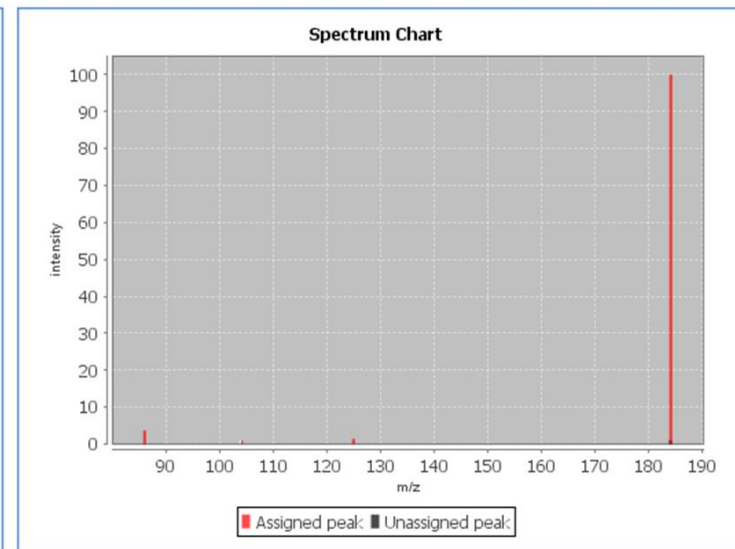

## Sphingomyelin (SM)

### Information

- Ionization: Positive- and negative-ion mode
- Main ion adducts used for identification:  $[M+H]^+$ ,  $[M+Na]^+$  and  $[M+HCOO]^-$
- Identification (fragmentation) grade: A, B and C
- Main ion adduct used for quantification:  $[M+H]^+$

## Match Lipid

| LipidIon                                                 | M-Sc.       | T-Sc.      | Occ.      | St.                      |
|----------------------------------------------------------|-------------|------------|-----------|--------------------------|
| <input type="radio"/> SM(d16:0_24:1)+H                   | 39.6        | 0.9        | 99        | <input type="checkbox"/> |
| <input type="radio"/> SM(d16:1_24:0)+H                   | 39.6        | 0.9        | 99        | <input type="checkbox"/> |
| <input type="radio"/> SM(d17:0_23:1)+H                   | 39.6        | 0.9        | 99        | <input type="checkbox"/> |
| <input type="radio"/> SM(d17:1_23:0)+H                   | 39.6        | 0.9        | 99        | <input type="checkbox"/> |
| <input type="radio"/> SM(d18:0_22:1)+H                   | 39.6        | 0.9        | 99        | <input type="checkbox"/> |
| <input checked="" type="radio"/> <b>SM(d18:1_22:0)+H</b> | <b>39.6</b> | <b>0.9</b> | <b>99</b> | <input type="checkbox"/> |
| <input type="radio"/> SM(d19:0_21:1)+H                   | 39.6        | 0.9        | 99        | <input type="checkbox"/> |
| <input type="radio"/> SM(d19:1_21:0)+H                   | 39.6        | 0.9        | 99        | <input type="checkbox"/> |
| <input type="radio"/> SM(d20:0_20:1)+H                   | 39.6        | 0.9        | 99        | <input type="checkbox"/> |
| <input type="radio"/> SM(d20:1_20:0)+H                   | 39.6        | 0.9        | 99        | <input type="checkbox"/> |

## Match Detail

| ObsMz    | Type | It.(%) | Frag.     | Delta(Da) |
|----------|------|--------|-----------|-----------|
| 86.097   | MS2  | 3.697  | C5H12N1   | 0.0006    |
| 104.1073 | MS2  | 1.009  | C5H14N1O1 | 0.0003    |
| 125      | MS2  | 1.469  | C2H6O4P1  | 0.0001    |
| 184.0037 | MS2  | 1.098  | -         | -         |
| 184.0733 | MS2  | 100    | (P-Cho)+H | 0         |

Representation of sphingomyelin (SM) identification information obtained with LipidSearch software e.g.  $[SM(d40:1)+H]^+$



# Sphingosine (SPH)

## Information

- Ionization: Positive-ion mode
- Main ion adducts used for identification:  $[M+H]^+$  and  $[M+H-H_2O]^+$
- Identification (fragmentation) grade: A, B and C
- Main ion adduct used for quantification:  $[M+H]^+$

Representation of sphingosine (SPH) identification information obtained with LipidSearch software e.g.  $[SPH(d18:1)+H]^+$

## Chromatogram

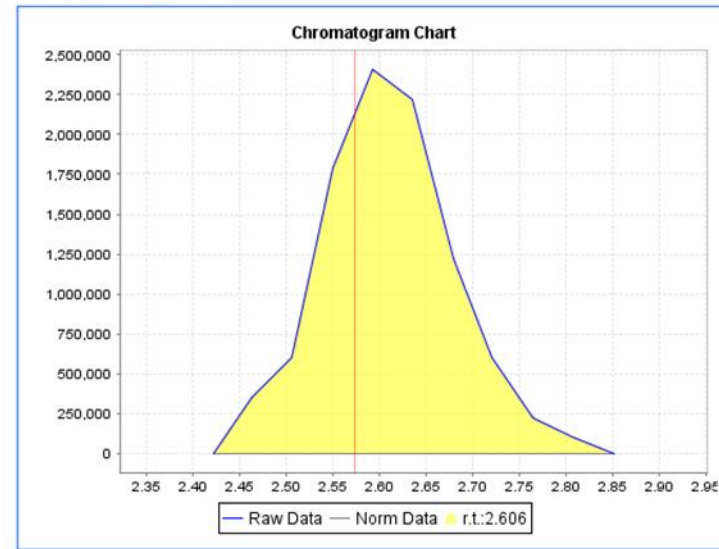

## Spectrum

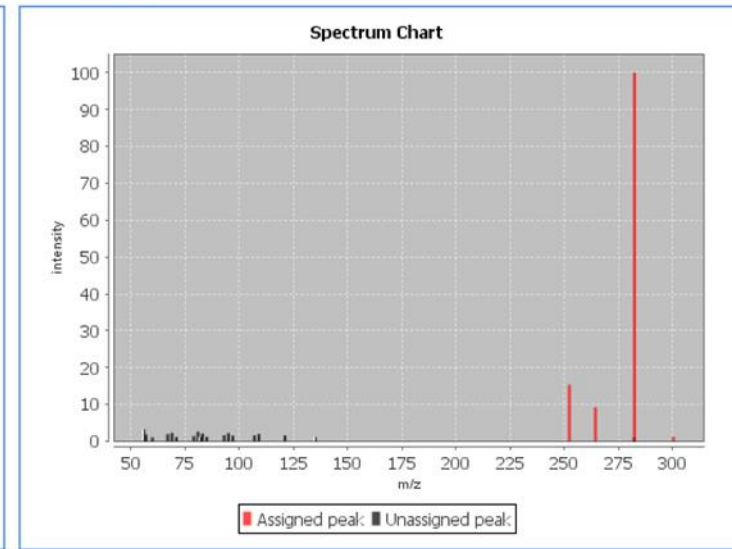

## Match Lipid

| LipidIon                                      | M-Sc. | T-Sc. | Occ. | St.                      |
|-----------------------------------------------|-------|-------|------|--------------------------|
| <input checked="" type="radio"/> SPH(d18:1)+H | 23.7  | 0.5   | 78.9 | <input type="checkbox"/> |
| <input type="radio"/> SPH(t18:0)+H-H2O        | 23.7  | 0.8   | 78.9 | <input type="checkbox"/> |

## Match Detail

| ObsMz    | Type | It.(%) | Frag.        | Delta(Da) |
|----------|------|--------|--------------|-----------|
| 82.0659  | MS2  | 1.17   | -            | -         |
| 83.0863  | MS2  | 2.128  | -            | -         |
| 85.1019  | MS2  | 1.221  | -            | -         |
| 93.0705  | MS2  | 1.686  | -            | -         |
| 95.0861  | MS2  | 2.244  | -            | -         |
| 97.1018  | MS2  | 1.607  | -            | -         |
| 107.0861 | MS2  | 1.629  | -            | -         |
| 109.1017 | MS2  | 2.036  | -            | -         |
| 121.1015 | MS2  | 1.62   | -            | -         |
| 135.1171 | MS2  | 1.154  | -            | -         |
| 252.269  | MS2  | 15.355 | NL[CH2O+H2O] | 0.0005    |
| 264.269  | MS2  | 9.23   | NL[2H2O]     | 0.0004    |
| 282.1546 | MS2  | 1.064  | -            | -         |
| 282.2797 | MS2  | 100    | NL[H2O]      | 0.0006    |
| 300.2906 | MS2  | 1.239  | M+H          | 0.0009    |

# Diglyceride (DG)

## Information

- Ionization: Positive-ion mode
- Main ion adducts used for identification:  $[M+Na]^+$ ,  $[M+NH_4]^+$ ,  $[M+H]^+$  and  $[M+K]^+$
- Identification (fragmentation) grade: A and B
- Main ion adducts used for quantification:  $[M+NH_4]^+$  and  $[M+Na]^+$

Representation of diglyceride (DG) identification information obtained with LipidSearch software e.g.  $[DG(34:0)+NH_4]^+$

Chromatogram

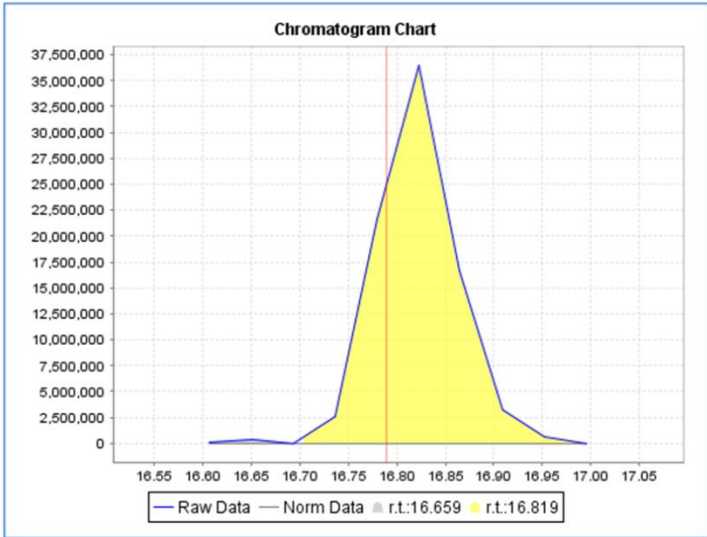

Spectrum

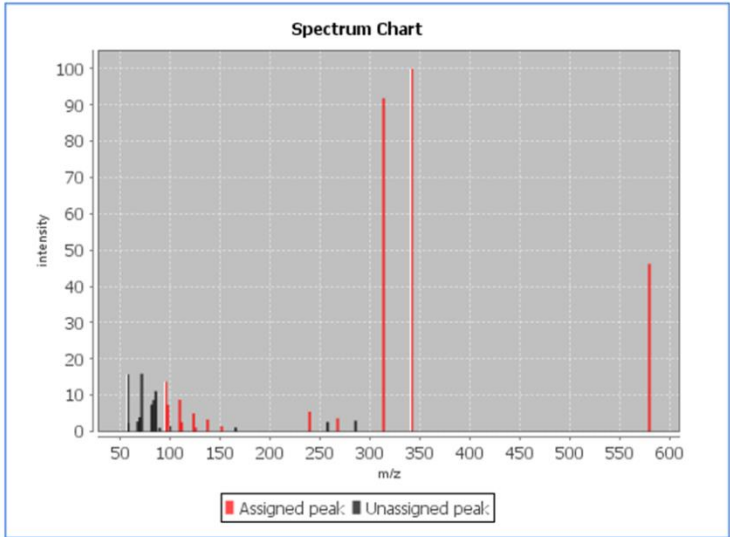

Match Lipid

| LipidIon                                           | M-Sc. | T-Sc. | Occ. | St.                      |
|----------------------------------------------------|-------|-------|------|--------------------------|
| <input checked="" type="radio"/> DG(18:0_16:0)+NH4 | 40.1  | 0.3   | 79   | <input type="checkbox"/> |
| <input type="radio"/> TG(12:0e_6:0_16:0)+NH4       | 16.3  | 0.3   | 53   | <input type="checkbox"/> |
| <input type="radio"/> DG(10:0_24:0)+NH4            | 2.6   | 0.3   | 24.3 | <input type="checkbox"/> |
| <input type="radio"/> DG(11:0_23:0)+NH4            | 2.6   | 0.3   | 24.3 | <input type="checkbox"/> |
| <input type="radio"/> DG(12:0_22:0)+NH4            | 2.6   | 0.3   | 24.3 | <input type="checkbox"/> |
| <input type="radio"/> DG(13:0_21:0)+NH4            | 2.6   | 0.3   | 24.3 | <input type="checkbox"/> |
| <input type="radio"/> DG(20:0_14:0)+NH4            | 2.6   | 0.3   | 24.3 | <input type="checkbox"/> |
| <input type="radio"/> DG(15:0_19:0)+NH4            | 2.6   | 0.3   | 24.3 | <input type="checkbox"/> |
| <input type="radio"/> DG(17:0_17:0)+NH4            | 2.6   | 0.3   | 24.3 | <input type="checkbox"/> |
| <input type="radio"/> DG(26:0_8:0)+NH4             | 2.6   | 0.3   | 24.3 | <input type="checkbox"/> |
| <input type="radio"/> DG(28:0_6:0)+NH4             | 2.6   | 0.3   | 24.3 | <input type="checkbox"/> |
| <input type="radio"/> TG(12:0e_8:0_14:0)+NH4       | 2.6   | 0.3   | 24.3 | <input type="checkbox"/> |
| <input type="radio"/> TG(12:0e_10:0_12:0)+NH4      | 2.6   | 0.3   | 24.3 | <input type="checkbox"/> |

Match Detail

| ObsMz    | Type | It.(%) | Frag.          | Delta(Da) |
|----------|------|--------|----------------|-----------|
| 99.1174  | MS2  | 1.52   | -              | -         |
| 109.1016 | MS2  | 8.773  | C8H13          | 0.0005    |
| 111.1173 | MS2  | 2.568  | C8H15          | 0.0005    |
| 123.1172 | MS2  | 4.979  | C9H15          | 0.0003    |
| 125.1328 | MS2  | 1.117  | C9H17          | 0.0003    |
| 137.1326 | MS2  | 3.304  | C10H17         | 0.0002    |
| 151.1482 | MS2  | 1.463  | C11H19         | 0.0001    |
| 165.164  | MS2  | 1.116  | -              | -         |
| 239.2372 | MS2  | 5.447  | FA(16:0)-OH    | 0.0003    |
| 257.2477 | MS2  | 2.623  | -              | -         |
| 267.2688 | MS2  | 3.644  | FA(18:0)-OH    | 0.0006    |
| 285.279  | MS2  | 2.978  | -              | -         |
| 313.2743 | MS2  | 91.874 | NL[FA(18:0)-H+ | 0.0005    |
| 341.3055 | MS2  | 100    | NL[FA(16:0)-H+ | 0.0005    |
| 579.5352 | MS2  | 46.208 | M-OH           | 0.0005    |

Copy

# Diglyceride (DG)

## Information

- Ionization: Positive-ion mode
- Main ion adducts used for identification:  $[M+Na]^+$ ,  $[M+NH_4]^+$ ,  $[M+H]^+$  and  $[M+K]^+$
- Identification (fragmentation) grade: A and B
- Main ion adducts used for quantification:  $[M+Na]^+$  and  $[M+NH_4]^+$

Representation of diglyceride (DG) identification information obtained with LipidSearch software e.g.  $[DG(34:0)+Na]^+$

## Chromatogram

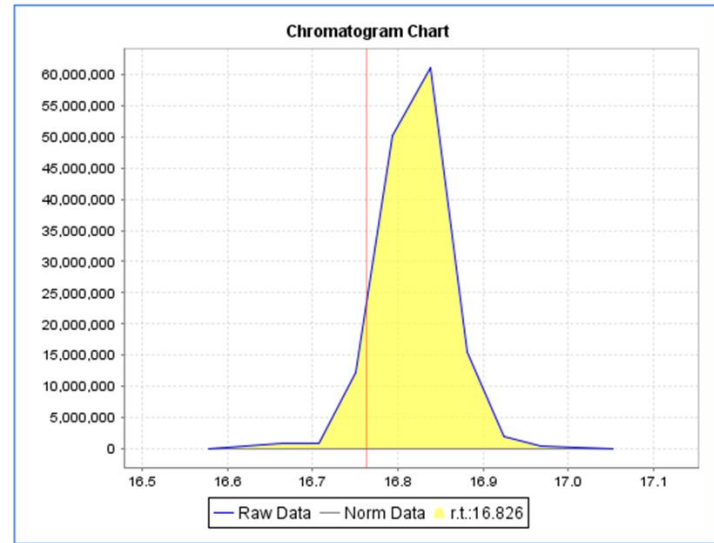

## Spectrum

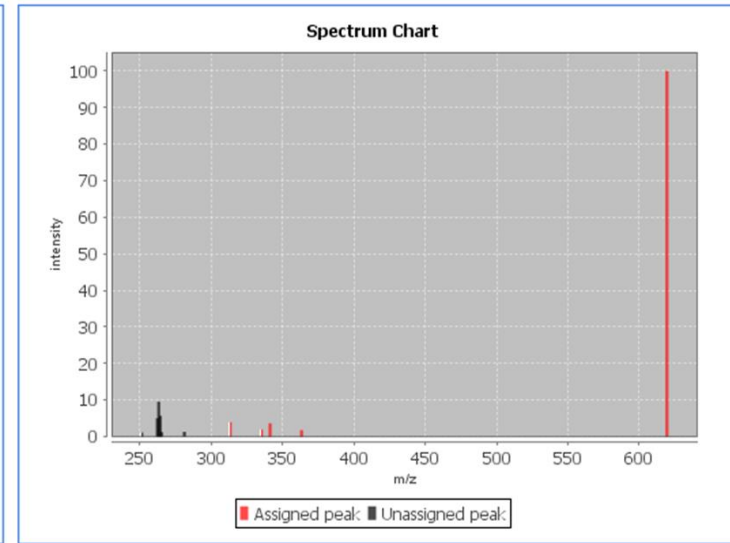

## Match Lipid

| LipidIon                                          | M-Sc. | T-Sc. | Occ. | St.                                 |
|---------------------------------------------------|-------|-------|------|-------------------------------------|
| <input checked="" type="radio"/> DG(18:0_16:0)+Na | 12.8  | 0.8   | 32.1 | <input checked="" type="checkbox"/> |
| <input type="radio"/> DG(16:0_20:3)+H             | 3.3   | 1.6   | 16.3 | <input checked="" type="checkbox"/> |
| <input type="radio"/> DG(18:0_18:3)+H             | 3.1   | 1.6   | 15.7 | <input checked="" type="checkbox"/> |
| <input type="radio"/> TG(12:0e_6:0_16:0)+Na       | 3.1   | 0.8   | 15.4 | <input checked="" type="checkbox"/> |
| <input type="radio"/> TG(12:0e_6:0_18:3)+H        | 2.1   | 1.6   | 10.3 | <input checked="" type="checkbox"/> |

## Match Detail

| ObsMz    | Type | It.(%) | Frag.          | Delta(Da) |
|----------|------|--------|----------------|-----------|
| 251.2563 | MS2  | 1.115  | -              | -         |
| 262.2532 | MS2  | 5.038  | -              | -         |
| 263.2568 | MS2  | 9.553  | -              | -         |
| 264.2603 | MS2  | 5.706  | -              | -         |
| 265.263  | MS2  | 1.215  | -              | -         |
| 281.2671 | MS2  | 1.297  | -              | -         |
| 313.2745 | MS2  | 3.979  | NL[FA(18:0)-H+ | 0.0007    |
| 335.2566 | MS2  | 1.897  | NL[FA(18:0)]   | 0.001     |
| 341.3055 | MS2  | 3.64   | NL[FA(16:0)-H+ | 0.0005    |
| 363.288  | MS2  | 1.777  | NL[FA(16:0)]   | 0.001     |
| 619.5273 | MS2  | 100    | M+Na           | 0.0001    |

Copy

## Chromatogram

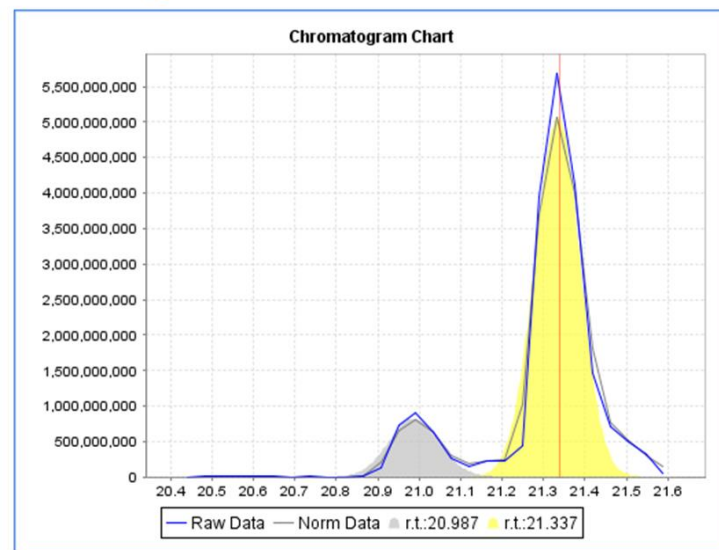

## Spectrum

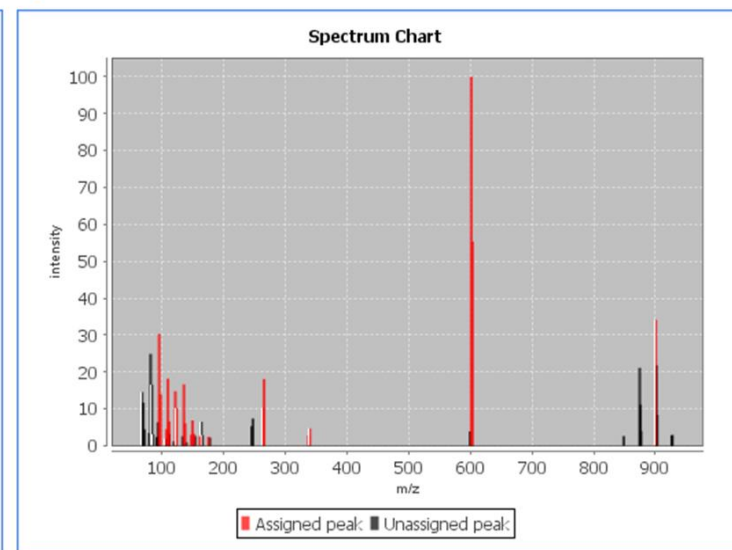

## Triglyceride (TG)

### Information

- Ionization: Positive-ion mode
- Main ion adducts used for identification:  $[M+NH_4]^+$ ,  $[M+Na]^+$ ,  $[M+H]^+$  and  $[M+K]^+$
- Identification (fragmentation) grade: A and B
- Main ion adduct used for quantification:  $[M+NH_4]^+$

## Match Lipid

| LipidIon                                                | M-Sc. | T-Sc. | Occ. | St.                      |
|---------------------------------------------------------|-------|-------|------|--------------------------|
| <input checked="" type="radio"/> TG(18:1_18:1_18:2)+NH4 | 58.7  | 0.1   | 64.2 | <input type="checkbox"/> |
| <input type="radio"/> TG(18:0_18:2_18:2)+NH4            | 29.4  | 0.1   | 41.2 | <input type="checkbox"/> |
| <input type="radio"/> TG(18:0_18:1_18:3)+NH4            | 21.4  | 0.1   | 51.7 | <input type="checkbox"/> |
| <input type="radio"/> TG(26:1_10:1_18:2)+NH4            | 16.9  | 0.1   | 40.9 | <input type="checkbox"/> |
| <input type="radio"/> TG(16:0_18:1_20:3)+NH4            | 16    | 0.1   | 51   | <input type="checkbox"/> |
| <input type="radio"/> TG(16:1_18:1_20:2)+NH4            | 16    | 0.1   | 51   | <input type="checkbox"/> |

## Match Detail

| ObsMz    | Type | It.(%) | Frag.              | Delta(Da) |
|----------|------|--------|--------------------|-----------|
| 245.2268 | MS2  | 5.321  | -                  | -         |
| 247.2429 | MS2  | 7.425  | -                  | -         |
| 263.2376 | MS2  | 10.285 | FA(18:2)-OH        | 0.0007    |
| 265.2533 | MS2  | 18.099 | FA(18:1)-OH        | 0.0007    |
| 337.2746 | MS2  | 2.817  | MG(18:2)-OH        | 0.0009    |
| 339.2901 | MS2  | 4.735  | MG(18:1)-OH        | 0.0007    |
| 599.5042 | MS2  | 3.917  | -                  | -         |
| 601.5206 | MS2  | 100    | NL[FA(18:1)-H+NH4] | 0.0016    |
| 603.5363 | MS2  | 55.323 | NL[FA(18:2)-H+NH4] | 0.0017    |
| 848.7728 | MS2  | 2.673  | -                  | -         |
| 874.7882 | MS2  | 21.143 | -                  | -         |
| 875.7919 | MS2  | 11.172 | -                  | -         |
| 876.7922 | MS2  | 3.992  | -                  | -         |
| 900.8035 | MS2  | 34.146 | M+NH4              | 0.0021    |

Representation of triglyceride (TG) identification information obtained with LipidSearch software e.g.  $[TG(54:4)+NH_4]^+$

## Chromatogram

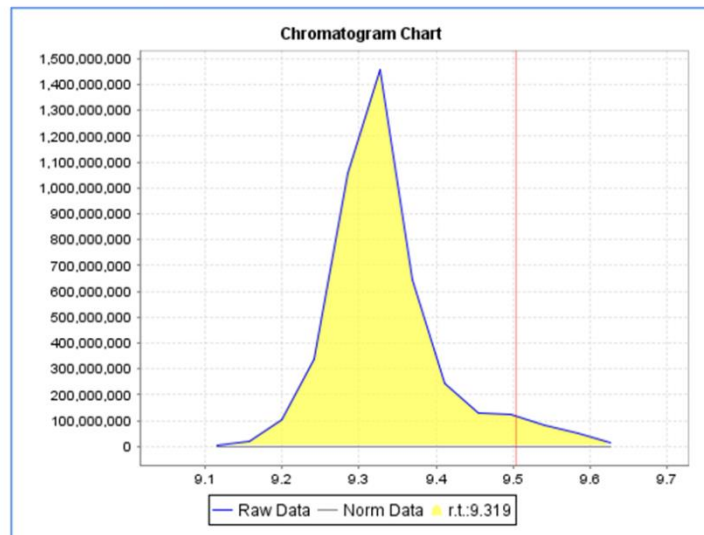

## Spectrum

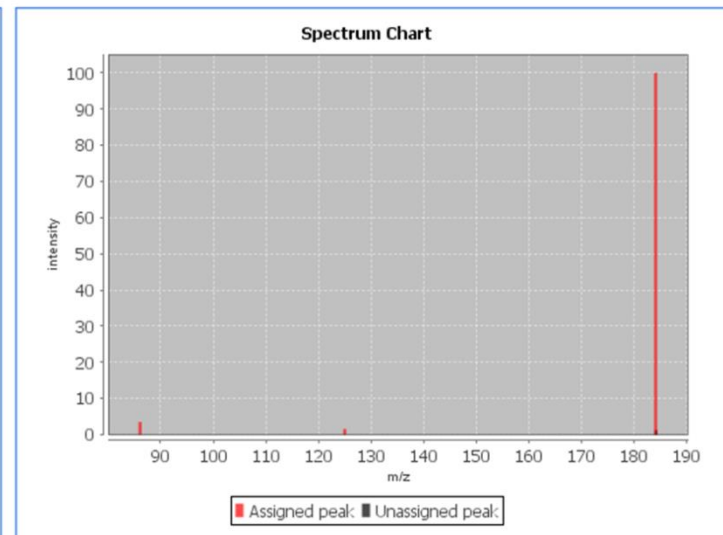

## Phosphatidylcholine (PC)

### Information

- Ionization: Positive-ion mode
- Main ion adducts used for identification:  $[M+H]^+$ ,  $[M+Na]^+$  and  $[M+K]^+$
- Identification (fragmentation) grade: A and B
- Main ion adduct used for quantification:  $[M+H]^+$

## Match Lipid

| LipidIon                                                | M-Sc.       | T-Sc.    | Occ.        | St.                      |
|---------------------------------------------------------|-------------|----------|-------------|--------------------------|
| <input type="radio"/> PC(8:0_24:1)+H                    | 29.7        | 1        | 98.8        | <input type="checkbox"/> |
| <input type="radio"/> PC(9:0_23:1)+H                    | 29.7        | 1        | 98.8        | <input type="checkbox"/> |
| <input type="radio"/> PC(10:0_22:1)+H                   | 29.7        | 1        | 98.8        | <input type="checkbox"/> |
| <input type="radio"/> PC(11:0_21:1)+H                   | 29.7        | 1        | 98.8        | <input type="checkbox"/> |
| <input type="radio"/> PC(20:1_12:0)+H                   | 29.7        | 1        | 98.8        | <input type="checkbox"/> |
| <input type="radio"/> PC(19:1_13:0)+H                   | 29.7        | 1        | 98.8        | <input type="checkbox"/> |
| <input type="radio"/> PC(18:1_14:0)+H                   | 29.7        | 1        | 98.8        | <input type="checkbox"/> |
| <input type="radio"/> PC(17:1_15:0)+H                   | 29.7        | 1        | 98.8        | <input type="checkbox"/> |
| <input checked="" type="radio"/> <b>PC(16:0_16:1)+H</b> | <b>29.7</b> | <b>1</b> | <b>98.8</b> | <input type="checkbox"/> |
| <input type="radio"/> PC(18:0_14:1)+H                   | 29.7        | 1        | 98.8        | <input type="checkbox"/> |
| <input type="radio"/> PC(20:0_12:1)+H                   | 29.7        | 1        | 98.8        | <input type="checkbox"/> |
| <input type="radio"/> PC(22:0_10:1)+H                   | 29.7        | 1        | 98.8        | <input type="checkbox"/> |
| <input type="radio"/> PC(26:1_6:0)+H                    | 29.7        | 1        | 98.8        | <input type="checkbox"/> |

## Match Detail

| ObsMz    | Type | It.(%) | Frag.     | Delta(Da) |
|----------|------|--------|-----------|-----------|
| 86.0971  | MS2  | 3.497  | C5H12N    | 0.0007    |
| 125.0001 | MS2  | 1.568  | C2H6O4P1  | 0.0002    |
| 184.0735 | MS2  | 100    | (P-Cho)+H | 0.0002    |
| 184.1413 | MS2  | 1.274  | -         | -         |

Copy

Representation of phosphatidylcholine (PC) identification information obtained with LipidSearch software e.g.  $[PC(32:1)+H]^+$

## Chromatogram

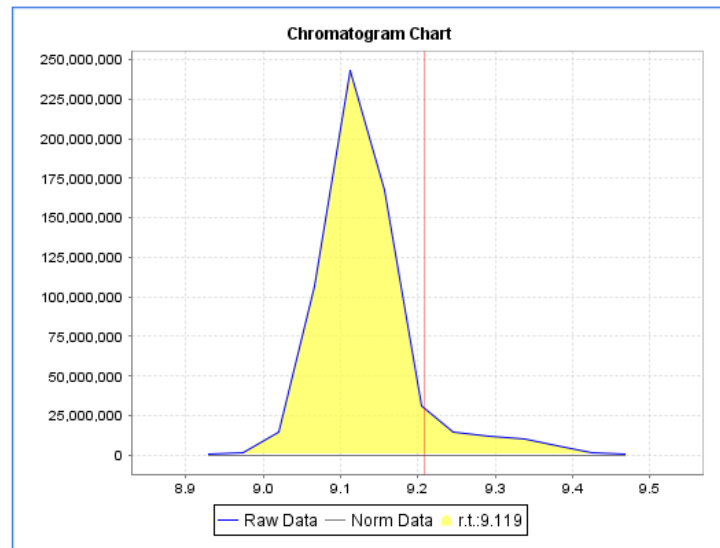

## Spectrum

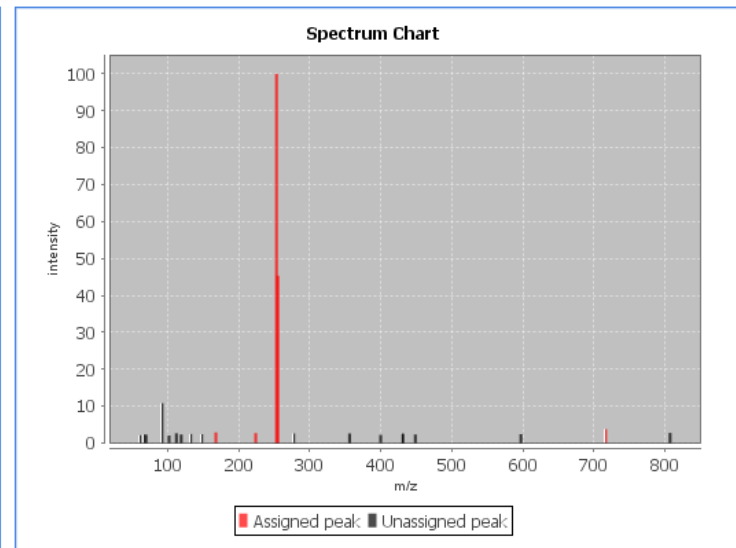

## Phosphatidylcholine (PC)

### Information

- Ionization: Negative-ion mode
- Main ion adducts used for identification:  $[M+HCOO]^-$  and  $[M-CH_3]^-$
- Identification (fragmentation) grade: A and B
- Main ion adduct used for quantification:  $[M+HCOO]^-$

## Match Lipid

| LipidIon                                            | M-Sc. | T-Sc. | Occ. | St.                                 |
|-----------------------------------------------------|-------|-------|------|-------------------------------------|
| <input checked="" type="radio"/> PC(16:0_16:1)+HCOO | 37.9  | 0.2   | 75.7 | <input checked="" type="checkbox"/> |
| <input type="radio"/> PS(16:0_19:0)-H               | 2.2   | 3.9   | 22.2 | <input checked="" type="checkbox"/> |

## Match Detail

| ObsMz    | Type | It.(%) | Frag.             | Delta(Da) |
|----------|------|--------|-------------------|-----------|
| 132.4829 | MS2  | 2.5    | -                 | -         |
| 148.0111 | MS2  | 2.442  | -                 | -         |
| 168.0422 | MS2  | 2.92   | (P-Cho)-CH3-H     | -0.001    |
| 224.0696 | MS2  | 2.699  | M-FA1-FA2+H2O-CH3 | 0.0002    |
| 253.2175 | MS2  | 100    | FA(16:1)-H        | 0.0002    |
| 255.2332 | MS2  | 45.333 | FA(16:0)-H        | 0.0002    |
| 277.44   | MS2  | 2.631  | -                 | -         |
| 356.3354 | MS2  | 2.599  | -                 | -         |
| 400.0869 | MS2  | 2.231  | -                 | -         |
| 430.5109 | MS2  | 2.553  | -                 | -         |
| 431.0115 | MS2  | 2.515  | -                 | -         |
| 448.7605 | MS2  | 2.318  | -                 | -         |
| 597.5173 | MS2  | 2.442  | -                 | -         |
| 716.5259 | MS2  | 3.786  | M-CH3             | 0.0023    |

Representation of phosphatidylcholine (PC) identification information obtained with LipidSearch software e.g.  $[PC(32:1)+HCOO]^-$

Copy

## Chromatogram

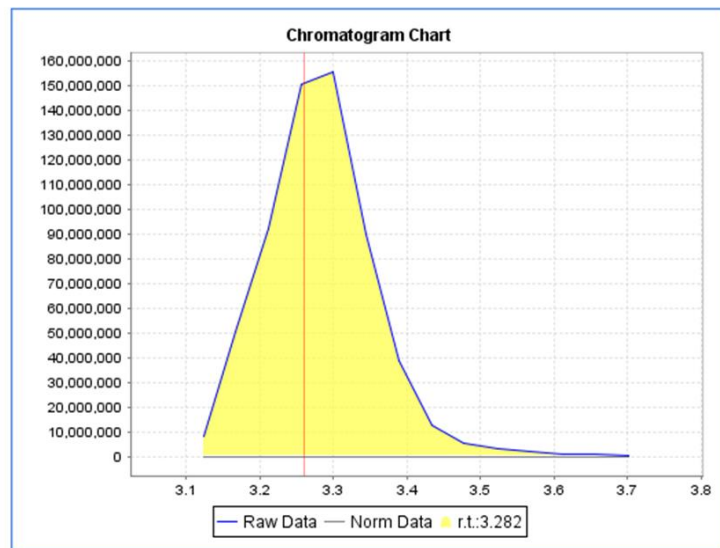

## Spectrum

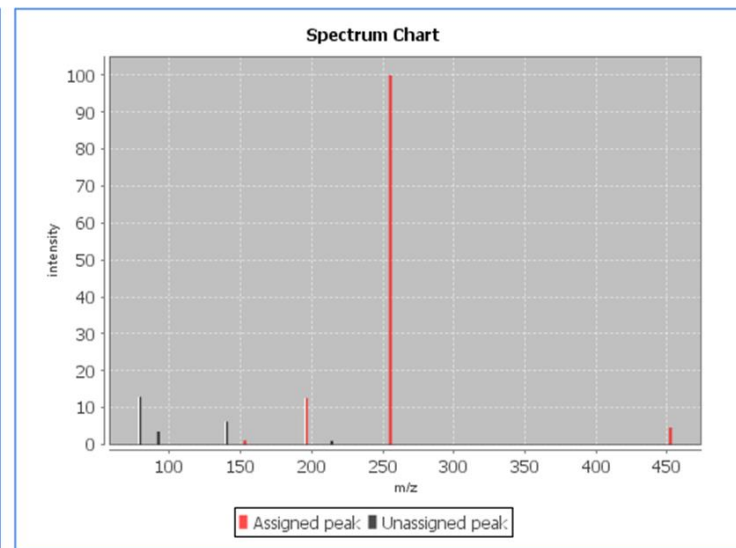

## Lysophosphatidylethanolamine (LPE)

### Information

- Ionization: Negative-ion mode
- Main ion adduct used for identification:  $[M-H]^-$
- Identification (fragmentation) grade: A and B
- Main ion adduct used for quantification:  $[M-H]^-$

## Match Lipid

| LipidIon      | M-Sc. | T-Sc. | Occ. | St. |
|---------------|-------|-------|------|-----|
| ● LPE(16:0)-H | 24.8  | 0.4   | 82.7 | ☒   |

## Match Detail

| ObsMz    | Type | It.(%) | Frag.        | Delta(Da) |
|----------|------|--------|--------------|-----------|
| 78.9573  | MS2  | 12.949 | -            | -         |
| 92.1398  | MS2  | 3.562  | -            | -         |
| 140.0104 | MS2  | 6.261  | -            | -         |
| 152.9947 | MS2  | 1.16   | GP-H3O       | -0.0011   |
| 196.0372 | MS2  | 12.623 | M-FA(16:0)-H | -0.0008   |
| 214.0479 | MS2  | 1.048  | -            | -         |
| 255.233  | MS2  | 100    | FA(16:0)-H   | 0         |
| 452.2785 | MS2  | 4.611  | M-H          | 0.0002    |

Representation of lysophosphatidylethanolamine (LPE) identification information obtained with LipidSearch software  
e.g.  $[LPE(16:0)-H]^-$

## Chromatogram

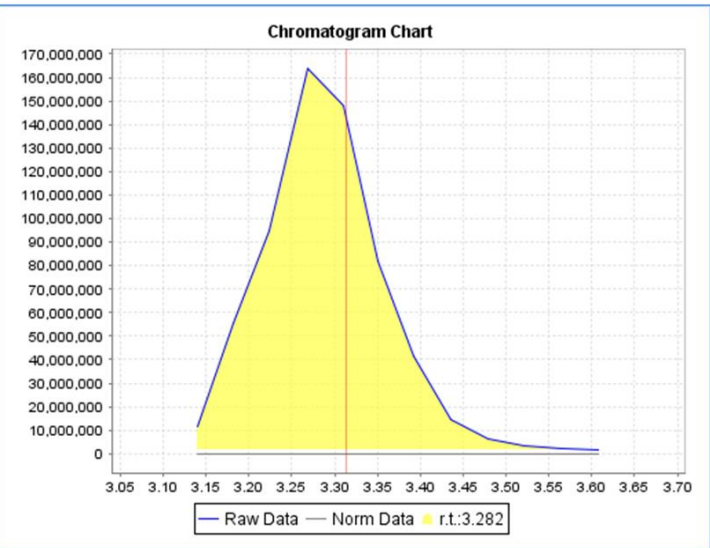

## Spectrum

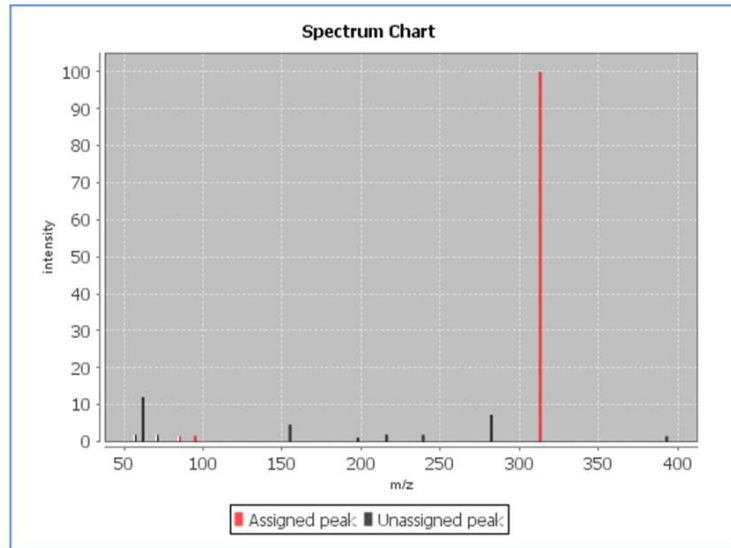

## Lysophosphatidylethanolamine (LPE)

### Information

- Ionization: Positive-ion mode
- Main ion adducts used for identification:  $[M+H]^+$  and  $[M+Na]^+$
- Identification (fragmentation) grade: A and B
- Main ion adduct used for quantification:  $[M+H]^+$

## Match Lipid

| LipidIon                                     | M-Sc. | T-Sc. | Occ. | St. |
|----------------------------------------------|-------|-------|------|-----|
| <input checked="" type="radio"/> LPE(16:0)+H | 7.7   | 0.1   | 75.1 | ☒   |
| <input type="radio"/> PE(8:0e_8:0)+H         | 7.7   | 0.1   | 75.1 | ☒   |
| <input type="radio"/> PE(10:0e_6:0)+H        | 7.7   | 0.1   | 75.1 | ☒   |

## Match Detail

| ObsMz    | Type | It.(%) | Frag.  | Delta(Da) |
|----------|------|--------|--------|-----------|
| 57.0709  | MS2  | 1.906  | -      | -         |
| 62.061   | MS2  | 12.064 | -      | -         |
| 71.0865  | MS2  | 1.912  | -      | -         |
| 85.1018  | MS2  | 1.44   | C6H13  | 0.0007    |
| 95.0861  | MS2  | 1.586  | C7H11  | 0.0006    |
| 155.0107 | MS2  | 4.634  | -      | -         |
| 198.0529 | MS2  | 1.089  | -      | -         |
| 216.0636 | MS2  | 1.901  | -      | -         |
| 239.2374 | MS2  | 1.886  | -      | -         |
| 282.2799 | MS2  | 7.291  | -      | -         |
| 313.2746 | MS2  | 100    | NL[PE] | 0.0009    |
| 393.2404 | MS2  | 1.477  | -      | -         |

Representation of lysophosphatidylethanolamine (LPE) identification information obtained with LipidSearch software  
e.g.  $[LPE(16:0)+H]^+$



## Chromatogram

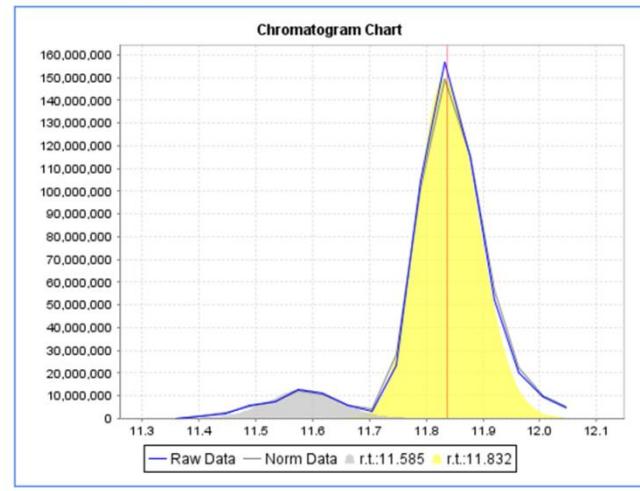

## Spectrum

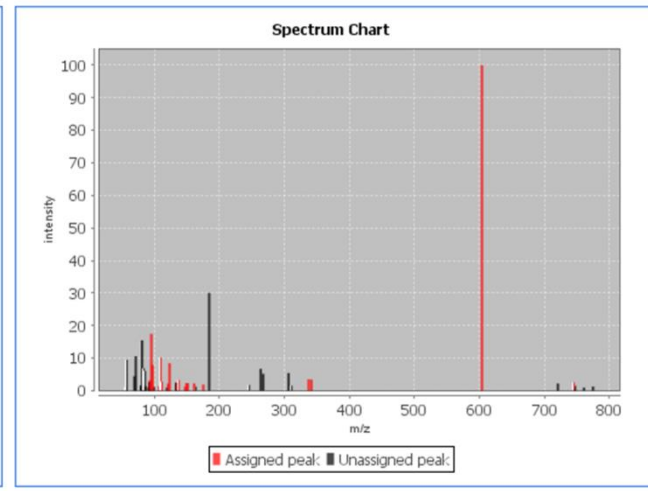

# Phosphatidylethanolamine (PE)

## Information

- Ionization: Positive-ion mode
- Main ion adducts used for identification:  $[M+H]^+$  and  $[M+Na]^+$
- Identification (fragmentation) grade: A and B
- Main ion adduct used for quantification:  $[M+H]^+$

## Match Lipid

| LipidIon                                         | M-Sc. | T-Sc. | Occ. | St. |
|--------------------------------------------------|-------|-------|------|-----|
| <input checked="" type="radio"/> PE(18:0_18:2)+H | 18.5  | 0.2   | 58.8 | ☒   |
| <input type="radio"/> PC(15:0_18:2)+H            | 7.4   | 3     | 34.4 | ☒   |
| <input type="radio"/> PE(12:0_24:2)+H            | 6.5   | 0.2   | 56.5 | ☒   |
| <input type="radio"/> PE(14:0_22:2)+H            | 6.5   | 0.2   | 56.5 | ☒   |
| <input type="radio"/> PE(16:0_20:2)+H            | 6.5   | 0.2   | 56.5 | ☒   |
| <input type="radio"/> PE(16:1_20:1)+H            | 6.5   | 0.2   | 56.5 | ☒   |
| <input type="radio"/> PE(17:1_19:1)+H            | 6.5   | 0.2   | 56.5 | ☒   |
| <input type="radio"/> PE(18:1_18:1)+H            | 6.5   | 0.2   | 56.5 | ☒   |
| <input type="radio"/> PE(22:0_14:2)+H            | 6.5   | 0.2   | 56.5 | ☒   |
| <input type="radio"/> PE(22:1_14:1)+H            | 6.5   | 0.2   | 56.5 | ☒   |
| <input type="radio"/> PE(24:0_12:2)+H            | 6.5   | 0.2   | 56.5 | ☒   |
| <input type="radio"/> PE(24:1_12:1)+H            | 6.5   | 0.2   | 56.5 | ☒   |
| <input type="radio"/> PE(26:0_10:2)+H            | 6.5   | 0.2   | 56.5 | ☒   |
| <input type="radio"/> PE(25:0_11:2)+H            | 6.5   | 0.2   | 56.5 | ☒   |
| <input type="radio"/> PE(25:1_11:1)+H            | 6.5   | 0.2   | 56.5 | ☒   |
| <input type="radio"/> PE(26:1_10:1)+H            | 6.5   | 0.2   | 56.5 | ☒   |

## Match Detail

| ObsMz    | Type | It.(%) | Frag.       | Delta(Da) |
|----------|------|--------|-------------|-----------|
| 151.1485 | MS2  | 2.341  | C11H19      | 0.0004    |
| 161.1329 | MS2  | 2.258  | C12H17      | 0.0004    |
| 163.1485 | MS2  | 1.28   | -           | -         |
| 175.1486 | MS2  | 1.942  | C13H19      | 0.0005    |
| 184.0737 | MS2  | 30.077 | -           | -         |
| 245.2269 | MS2  | 1.758  | -           | -         |
| 263.2376 | MS2  | 6.749  | -           | -         |
| 267.2688 | MS2  | 5.231  | -           | -         |
| 306.28   | MS2  | 5.466  | -           | -         |
| 310.3115 | MS2  | 1.585  | -           | -         |
| 337.2746 | MS2  | 3.55   | MG(18:2)-OH | 0.0008    |
| 341.3056 | MS2  | 3.444  | MG(18:0)-OH | 0.0006    |
| 603.5358 | MS2  | 100    | NL[PE]      | 0.0011    |
| 720.5909 | MS2  | 2.228  | -           | -         |
| 744.5525 | MS2  | 2.598  | M+H         | -0.0013   |

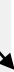

| ObsMz    | Type | It.(%) | Frag.  | Delta(Da) |
|----------|------|--------|--------|-----------|
| 55.0552  | MS2  | 1.147  |        |           |
| 57.0709  | MS2  | 9.491  |        |           |
| 69.0708  | MS2  | 4.477  |        |           |
| 71.0864  | MS2  | 10.618 |        |           |
| 79.0551  | MS2  | 1.611  |        |           |
| 81.0707  | MS2  | 15.508 |        |           |
| 83.0863  | MS2  | 6.949  |        |           |
| 85.102   | MS2  | 6.121  |        |           |
| 86.0972  | MS2  | 1.401  |        |           |
| 91.0548  | MS2  | 1.14   |        |           |
| 92.1468  | MS2  | 2.722  |        |           |
| 93.0706  | MS2  | 3.286  | C7H9   | 0.0007    |
| 95.0862  | MS2  | 17.492 | C7H11  | 0.0007    |
| 97.1019  | MS2  | 7.943  | C7H13  | 0.0007    |
| 99.0811  | MS2  | 1.155  |        |           |
| 107.0861 | MS2  | 1.46   | C8H11  | 0.0006    |
| 109.1018 | MS2  | 10.269 | C8H13  | 0.0006    |
| 111.1174 | MS2  | 2.869  | C8H15  | 0.0006    |
| 119.0862 | MS2  | 1.047  |        |           |
| 121.1018 | MS2  | 2.253  | C9H13  | 0.0006    |
| 123.1172 | MS2  | 8.486  | C9H15  | 0.0004    |
| 133.1016 | MS2  | 2.545  |        |           |
| 135.1172 | MS2  | 2.476  | C10H15 | 0.0004    |
| 137.1328 | MS2  | 3.336  | C10H17 | 0.0003    |
| 147.1172 | MS2  | 1.258  | C11H15 | 0.0003    |
| 149.1328 | MS2  | 2.355  | C11H17 | 0.0003    |

Copy

## Chromatogram

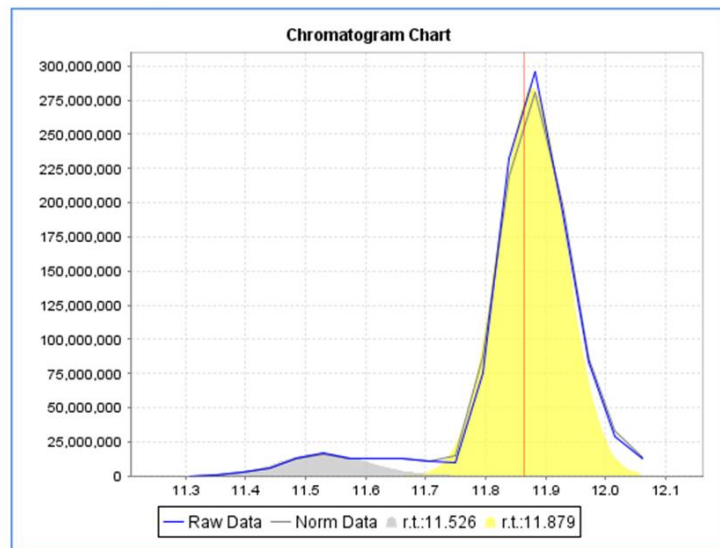

## Spectrum

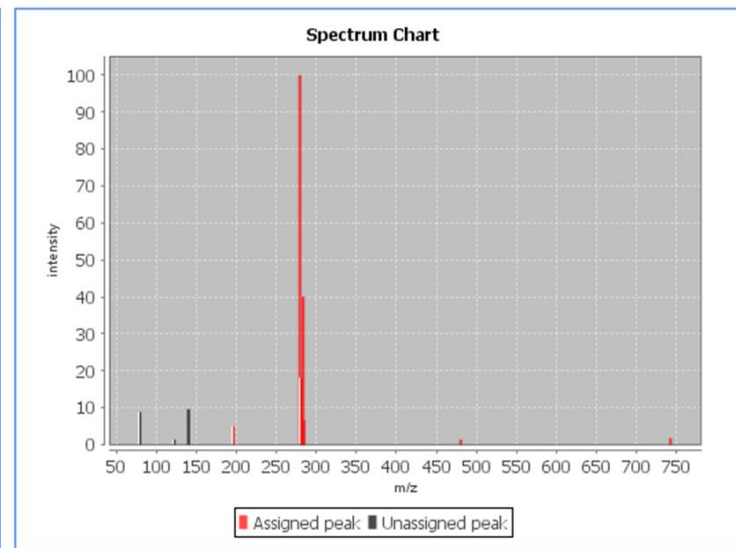

## Phosphatidylethanolamine (PE)

### Information

- Ionization: Negative-ion mode
- Main ion adduct used for identification:  $[M-H]^-$
- Identification (fragmentation) grade: A and B
- Main ion adduct used for quantification:  $[M-H]^-$

## Match Lipid

| LipidIon                                         | M-Sc. | T-Sc. | Occ. | St.                                 |
|--------------------------------------------------|-------|-------|------|-------------------------------------|
| <input checked="" type="radio"/> PE(18:0_18:2)-H | 35.8  | 0.3   | 89.5 | <input checked="" type="checkbox"/> |
| <input type="radio"/> dMePE(16:0_18:2)-H         | 12.5  | 2.3   | 62.5 | <input checked="" type="checkbox"/> |
| <input type="radio"/> PC(16:0_18:2)-CH3          | 12.5  | 2.4   | 62.5 | <input checked="" type="checkbox"/> |

## Match Detail

| ObsMz    | Type | It.(%) | Frag.                | Delta(Da) |
|----------|------|--------|----------------------|-----------|
| 78.9572  | MS2  | 8.905  | -                    | -         |
| 121.9995 | MS2  | 1.463  | -                    | -         |
| 140.0103 | MS2  | 9.641  | -                    | -         |
| 196.0371 | MS2  | 4.923  | M-FA1-FA2+H2O-H      | -0.0009   |
| 279.2329 | MS2  | 100    | FA(18:2)-H           | 0         |
| 280.2363 | MS2  | 18.164 | FA(18:2)-H [isotope] | 1.0033    |
| 283.2642 | MS2  | 40.118 | FA(18:0)-H           | -0.0001   |
| 284.2677 | MS2  | 6.708  | FA(18:0)-H [isotope] | 1.0035    |
| 480.3096 | MS2  | 1.391  | LPE(18:0)-H          | 0         |
| 742.5389 | MS2  | 1.778  | M-H                  | -0.0004   |

Representation of phosphatidylethanolamine (PE) identification information obtained with LipidSearch software  
e.g.  $[PE(36:2)-H]^-$

## Chromatogram

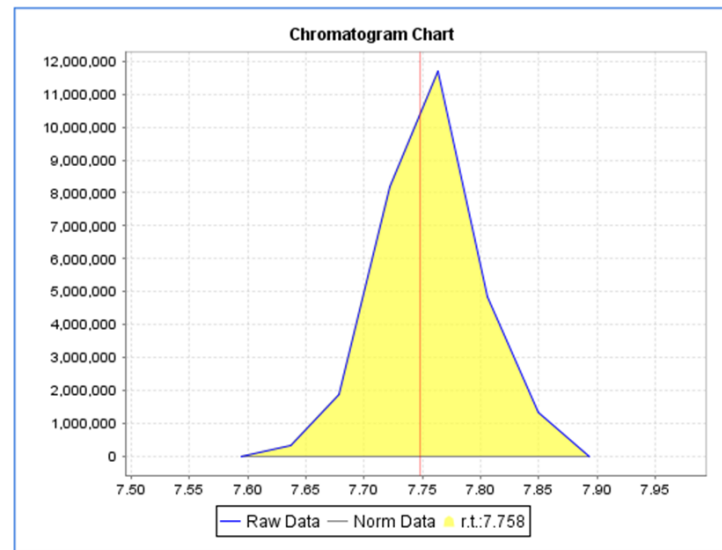

## Spectrum

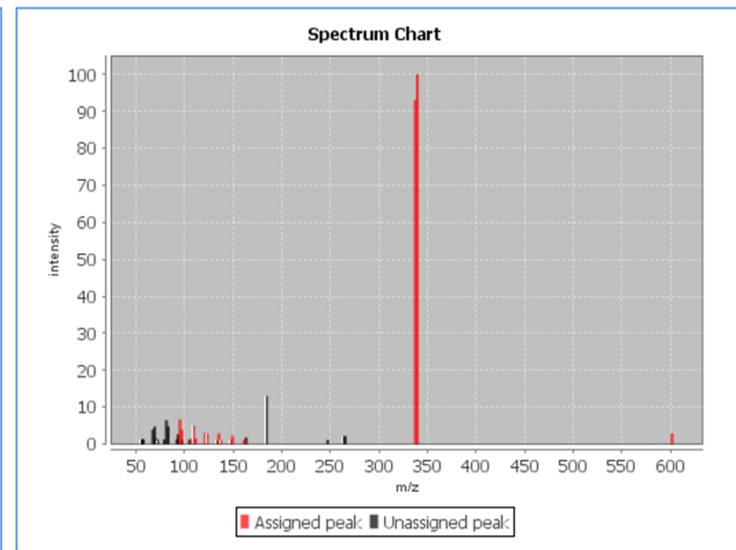

## Phosphatidylglycerol (PG)

### Information

- Ionization: Positive-ion mode
- Main ion adducts used for identification:  $[M+NH_4]^+$ ,  $[M+H]^+$  and  $[M+Na]^+$
- Identification (fragmentation) grade: A and B
- Main ion adduct used for quantification:  $[M+NH_4]^+$

## Match Lipid

| LipidIon                                           | M-Sc. | T-Sc. | Occ. | St.                                 |
|----------------------------------------------------|-------|-------|------|-------------------------------------|
| <input checked="" type="radio"/> PG(18:1_18:2)+NH4 | 25.1  | 2.3   | 80.6 | <input checked="" type="checkbox"/> |
| <input type="radio"/> PS(18:0_18:1)+H              | 5.2   | 9.1   | 46.8 | <input checked="" type="checkbox"/> |

## Match Detail

| ObsMz    | Type | It.(%) | Frag.         | Delta(Da) |
|----------|------|--------|---------------|-----------|
| 123.1172 | MS2  | 2.902  | C9H15         | 0.0004    |
| 133.1014 | MS2  | 1.043  | -             | -         |
| 135.1171 | MS2  | 2.909  | C10H15        | 0.0003    |
| 137.1328 | MS2  | 1.088  | C10H17        | 0.0003    |
| 147.1171 | MS2  | 1.188  | C11H15        | 0.0002    |
| 149.1328 | MS2  | 2.24   | C11H17        | 0.0004    |
| 161.1329 | MS2  | 1.197  | C12H17        | 0.0004    |
| 163.1483 | MS2  | 1.804  | -             | -         |
| 184.0737 | MS2  | 13.011 | -             | -         |
| 247.2427 | MS2  | 1.124  | -             | -         |
| 263.2375 | MS2  | 2.107  | -             | -         |
| 265.2532 | MS2  | 2.25   | -             | -         |
| 337.2745 | MS2  | 93.162 | MG(18:2)-OH   | 0.0008    |
| 339.2902 | MS2  | 100    | MG(18:1)-OH   | 0.0008    |
| 601.5166 | MS2  | 2.903  | NL[PG,+NH4]+H | -0.0025   |

Representation of phosphatidylglycerol (PG) identification information obtained with LipidSearch software e.g.  $[PG(36:3)+NH_4]^+$

| ObsMz    | Type | It.(%) | Frag. | Delta(Da) |
|----------|------|--------|-------|-----------|
| 55.0552  | MS2  | 1.308  |       |           |
| 57.0345  | MS2  | 1.18   |       |           |
| 57.0709  | MS2  | 1.428  |       |           |
| 67.0551  | MS2  | 3.905  |       |           |
| 69.0707  | MS2  | 4.744  |       |           |
| 71.0864  | MS2  | 1.462  |       |           |
| 72.0816  | MS2  | 1.034  |       |           |
| 79.0551  | MS2  | 1.282  |       |           |
| 81.0707  | MS2  | 6.478  |       |           |
| 83.0862  | MS2  | 4.832  |       |           |
| 92.1458  | MS2  | 1.347  |       |           |
| 93.0706  | MS2  | 2.643  |       |           |
| 95.0862  | MS2  | 6.72   | C7H11 | 0.0006    |
| 97.0654  | MS2  | 1.085  |       |           |
| 97.1018  | MS2  | 3.848  | C7H13 | 0.0006    |
| 105.0704 | MS2  | 1.191  |       |           |
| 107.0862 | MS2  | 1.538  | C8H11 | 0.0006    |
| 109.1017 | MS2  | 5.017  | C8H13 | 0.0005    |
| 111.1174 | MS2  | 1.549  | C8H15 | 0.0006    |
| 121.1016 | MS2  | 3.011  | C9H13 | 0.0004    |

Copy

## Chromatogram

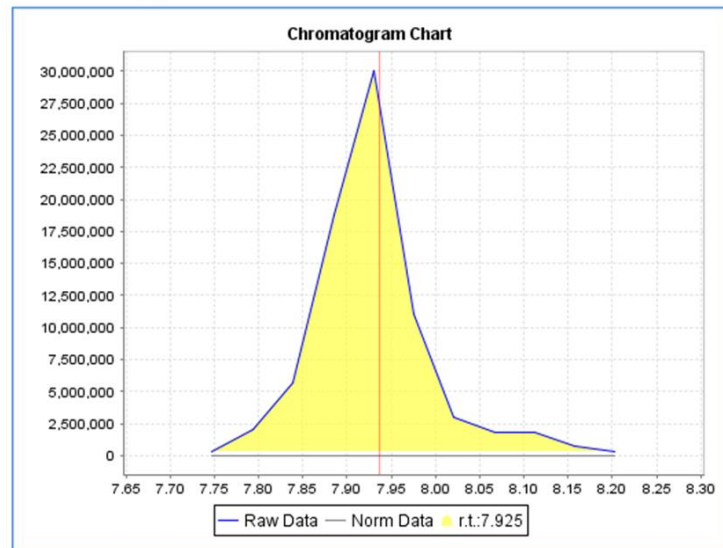

## Spectrum

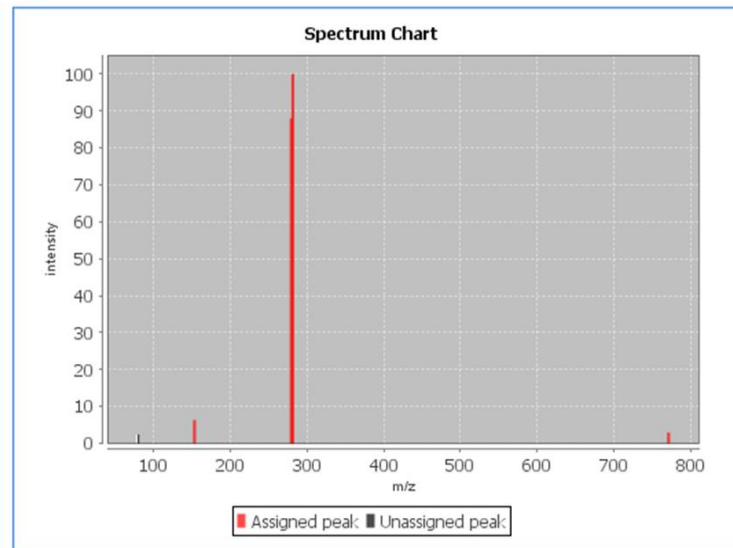

## Phosphatidylglycerol (PG)

### Information

- Ionization: Negative-ion mode
- Main ion adduct used for identification:  $[M-H]^-$
- Identification (fragmentation) grade: A and B
- Main ion adduct used for quantification:  $[M-H]^-$

## Match Lipid

| LipidIon                                         | M-Sc. | T-Sc. | Occ. | St.                                 |
|--------------------------------------------------|-------|-------|------|-------------------------------------|
| <input checked="" type="radio"/> PG(18:1_18:2)-H | 29.6  | 1.5   | 98.8 | <input checked="" type="checkbox"/> |

## Match Detail

| ObsMz    | Type | It.(%) | Frag.      | Delta(Da) |
|----------|------|--------|------------|-----------|
| 78.9574  | MS2  | 2.434  | -          | -         |
| 152.9947 | MS2  | 6.327  | GP-H3O     | -0.0012   |
| 279.2334 | MS2  | 87.976 | FA(18:2)-H | 0.0004    |
| 281.249  | MS2  | 100    | FA(18:1)-H | 0.0004    |
| 771.5175 | MS2  | 2.927  | M-H        | -0.0006   |

Representation of phosphatidylglycerol (PG) identification information obtained with LipidSearch software e.g.  $[PG(36:3)-H]^-$

## Chromatogram

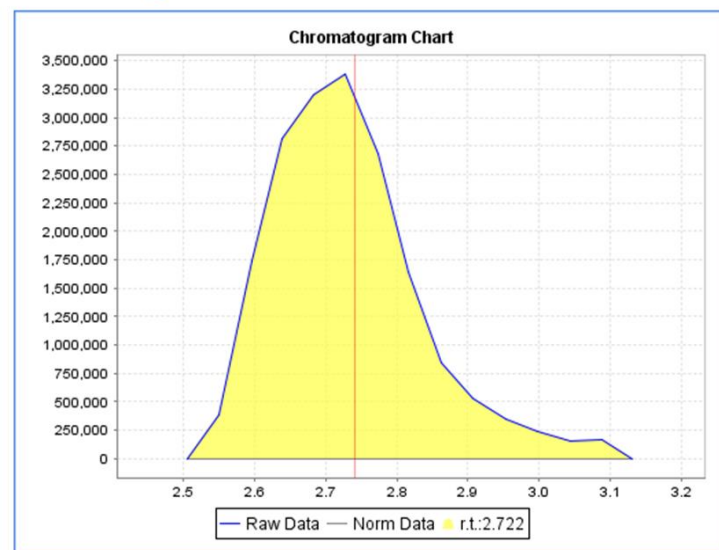

## Spectrum

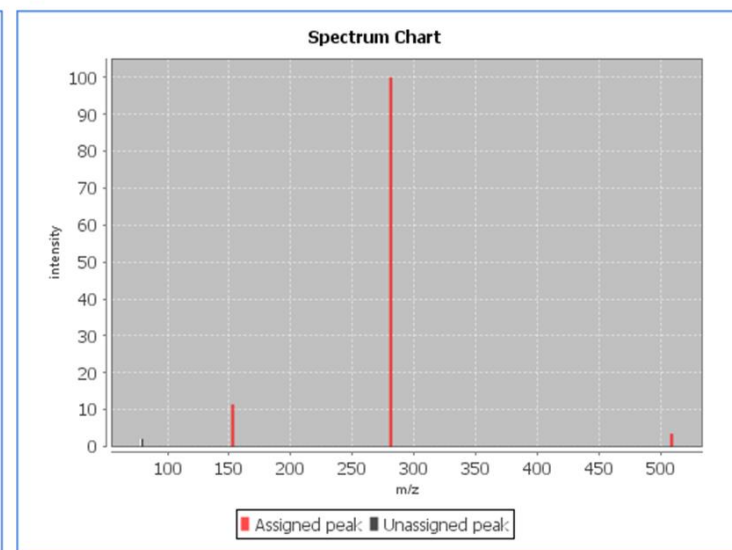

## Lysophosphatidylglycerol (LPG)

### Information

- Ionization: Negative- and positive-ion mode
- Main ion adducts used for identification:  $[M-H]^-$ ,  $[M+NH_4]^+$  and  $[M+H]^+$
- Identification (fragmentation) grade: A and B
- Main ion adduct used for quantification:  $[M-H]^-$

## Match Lipid

| LipidIon                                     | M-Sc. | T-Sc. | Occ. | St.                                 |
|----------------------------------------------|-------|-------|------|-------------------------------------|
| <input checked="" type="radio"/> LPG(18:1)-H | 19.6  | 0.3   | 98.2 | <input checked="" type="checkbox"/> |

## Match Detail

| ObsMz    | Type | It.(%) | Frag.      | Delta(Da) |
|----------|------|--------|------------|-----------|
| 78.9572  | MS2  | 2.099  | -          | -         |
| 152.9946 | MS2  | 11.447 | GP-H3O     | -0.0012   |
| 281.2489 | MS2  | 100    | FA(18:1)-H | 0.0003    |
| 509.29   | MS2  | 3.48   | M-H        | 0.0015    |

Representation of lysophosphatidylglycerol (LPG) identification information obtained with LipidSearch software  
e.g.  $[LPG(18:1)-H]^-$

## Chromatogram

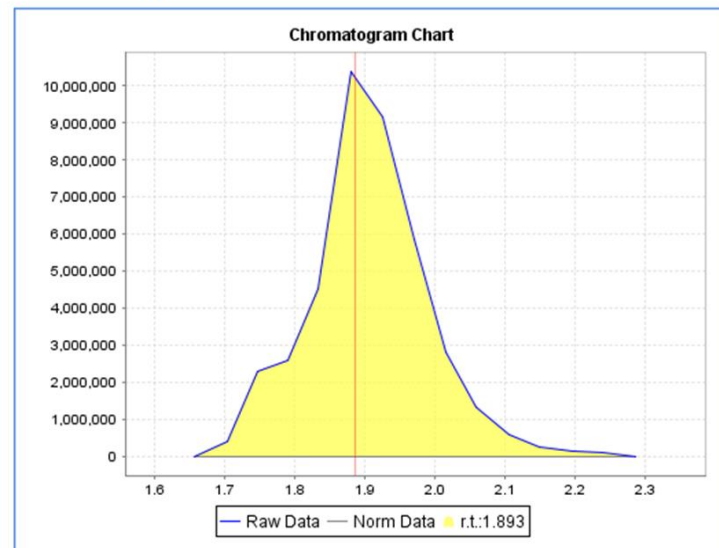

## Spectrum

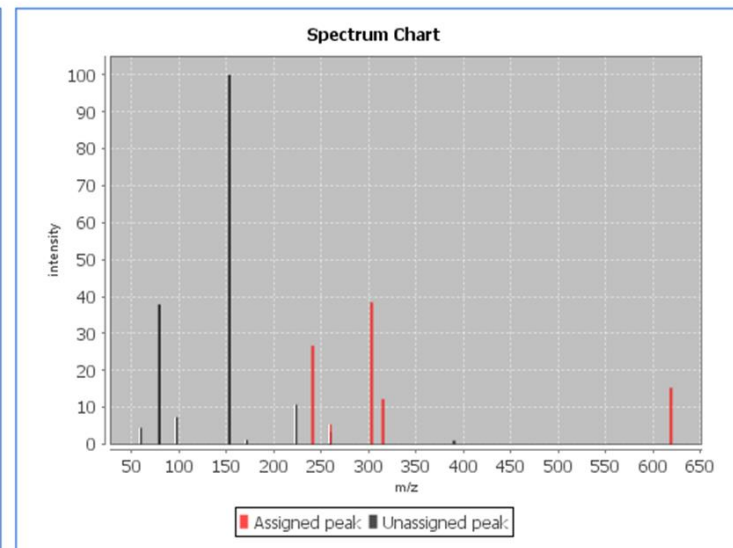

## Lysophosphatidylinositol (LPI)

### Information

- Ionization: Negative- and positive-ion mode
- Main ion adducts used for identification:  $[M-H]^-$ ,  $[M+H]^+$  and  $[M+NH_4]^+$
- Identification (fragmentation) grade: A and B
- Main ion adduct used for quantification:  $[M-H]^-$

## Match Lipid

| LipidIon                                     | M-Sc. | T-Sc. | Occ. | St. |
|----------------------------------------------|-------|-------|------|-----|
| <input checked="" type="radio"/> LPI(20:4)-H | 11.6  | 1     | 33.3 | ☒   |
| <input type="radio"/> PI(8:0e_12:4)-H        | 4.9   | 1     | 16.4 | ☒   |
| <input type="radio"/> PI(8:0p_12:3)-H        | 4.9   | 1     | 16.4 | ☒   |
| <input type="radio"/> PI(8:1e_12:3)-H        | 4.9   | 1     | 16.4 | ☒   |
| <input type="radio"/> PI(10:0e_10:4)-H       | 4.9   | 1     | 16.4 | ☒   |
| <input type="radio"/> PI(10:0p_10:3)-H       | 4.9   | 1     | 16.4 | ☒   |
| <input type="radio"/> PI(10:1e_10:3)-H       | 4.9   | 1     | 16.4 | ☒   |

## Match Detail

| ObsMz    | Type | It.(%) | Frag.            | Delta(Da) |
|----------|------|--------|------------------|-----------|
| 59.012   | MS2  | 4.502  | -                | -         |
| 78.9572  | MS2  | 37.906 | -                | -         |
| 96.9678  | MS2  | 7.343  | -                | -         |
| 152.9944 | MS2  | 100    | -                | -         |
| 171.0054 | MS2  | 1.182  | -                | -         |
| 223.0007 | MS2  | 10.776 | -                | -         |
| 241.0116 | MS2  | 26.716 | PH(inositol)-H2< | -0.0003   |
| 259.0225 | MS2  | 3.357  | -                | -         |
| 259.2433 | MS2  | 5.341  | FA(20:4)-H-CO:   | 0.0002    |
| 303.2331 | MS2  | 38.454 | FA(20:4)-H       | 0.0001    |
| 315.049  | MS2  | 12.231 | M-FA(20:4)-H     | 0.0003    |
| 390.1433 | MS2  | 1.035  | -                | -         |
| 619.2891 | MS2  | 15.299 | M-H              | 0.0002    |

Representation of lysophosphatidylinositol (LPI) identification information obtained with LipidSearch software  
e.g.  $[LPI(20:4)-H]^-$

## Chromatogram

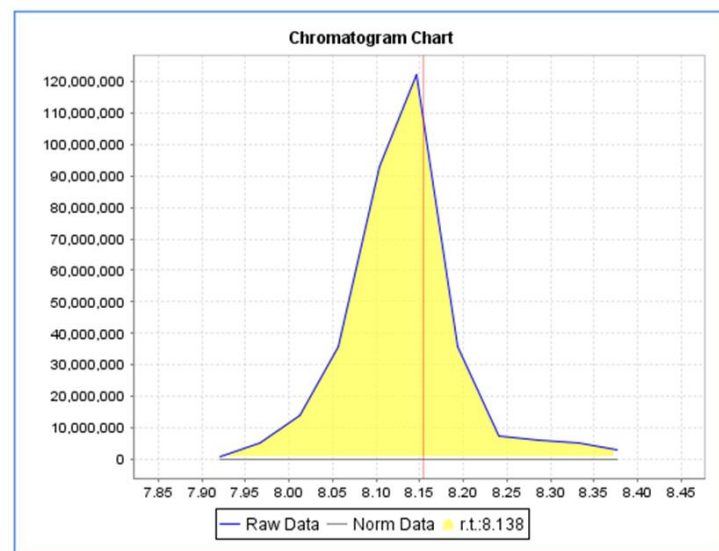

## Spectrum

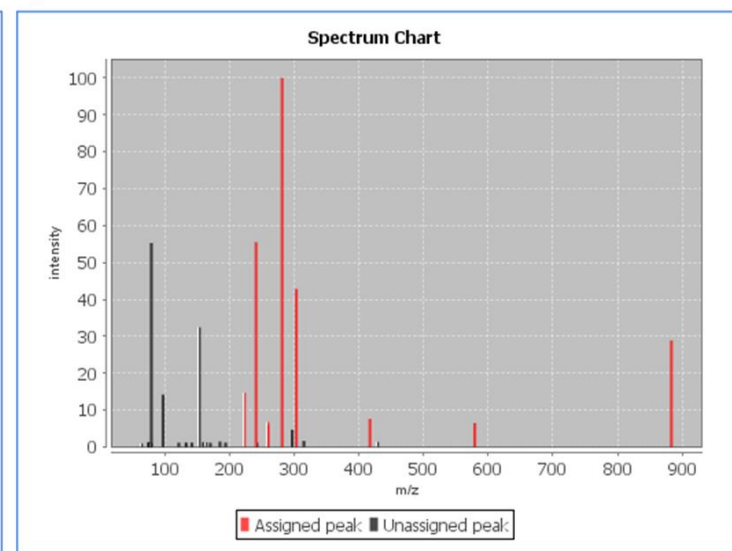

## Phosphatidylinositol (PI)

### Information

- Ionization: Negative-ion mode
- Main ion adduct used for identification:  $[M-H]^-$
- Identification (fragmentation) grade: A and B
- Main ion adduct used for quantification:  $[M-H]^-$

## Match Lipid

| LipidIon                                         | M-Sc. | T-Sc. | Occ. | St.                      |
|--------------------------------------------------|-------|-------|------|--------------------------|
| <input checked="" type="radio"/> PI(18:1_20:4)-H | 48.9  | 0.1   | 65.2 | <input type="checkbox"/> |
| <input type="radio"/> PI(16:0_22:5)-H            | 6.2   | 0.1   | 20.7 | <input type="checkbox"/> |
| <input type="radio"/> PI(16:1_22:4)-H            | 6.2   | 0.1   | 20.7 | <input type="checkbox"/> |
| <input type="radio"/> PI(18:0_20:5)-H            | 6.2   | 0.1   | 20.7 | <input type="checkbox"/> |
| <input type="radio"/> PI(20:3_18:2)-H            | 6.2   | 0.1   | 20.7 | <input type="checkbox"/> |
| <input type="radio"/> PI(18:3_20:2)-H            | 6.2   | 0.1   | 20.7 | <input type="checkbox"/> |
| <input type="radio"/> PI(18:4_20:1)-H            | 6.2   | 0.1   | 20.7 | <input type="checkbox"/> |
| <input type="radio"/> PI(24:1_14:4)-H            | 6.2   | 0.1   | 20.7 | <input type="checkbox"/> |
| <input type="radio"/> PI(24:2_14:3)-H            | 6.2   | 0.1   | 20.7 | <input type="checkbox"/> |
| <input type="radio"/> PI(26:1_12:4)-H            | 6.2   | 0.1   | 20.7 | <input type="checkbox"/> |
| <input type="radio"/> PI(27:1_11:4)-H            | 6.2   | 0.1   | 20.7 | <input type="checkbox"/> |
| <input type="radio"/> PI(28:1_10:4)-H            | 6.2   | 0.1   | 20.7 | <input type="checkbox"/> |

## Match Detail

| ObsMz    | Type | It.(%) | Frag.               | Delta(Da) |
|----------|------|--------|---------------------|-----------|
| 193.89   | MS2  | 1.24   | -                   | -         |
| 223.0008 | MS2  | 14.71  | PH(inositol)-2H2O-H | -0.0006   |
| 241.0116 | MS2  | 55.524 | PH(inositol)-H2O-H  | -0.0003   |
| 242.1822 | MS2  | 1.226  | -                   | -         |
| 259.0224 | MS2  | 5.982  | IP                  | 0         |
| 259.2432 | MS2  | 6.788  | FA(20:4)-H-CO2      | 0.0001    |
| 281.2487 | MS2  | 100    | FA(18:1)-H          | 0.0001    |
| 297.0378 | MS2  | 4.706  | -                   | -         |
| 303.2331 | MS2  | 42.824 | FA(20:4)-H          | 0.0001    |
| 315.0498 | MS2  | 1.672  | -                   | -         |
| 417.2404 | MS2  | 7.655  | LPA(18:1)-H3O       | -0.0008   |
| 428.7987 | MS2  | 1.391  | -                   | -         |
| 579.2956 | MS2  | 6.538  | LPI(18:1)-H2O-H     | 0.0017    |
| 883.5342 | MS2  | 28.895 | M-H                 | 0         |

Representation of phosphatidylinositol (PI) identification information obtained with LipidSearch software e.g.  $[PI(38:5)-H]^-$

# Phosphatidylinositol (PI)

## Information

- Ionization: Positive-ion mode
- Main ion adducts used for identification:  $[M+H]^+$ ,  $[M+Na]^+$ ,  $[M+K]^+$  and  $[M+NH_4]^+$
- Identification (fragmentation) grade: A and B
- Main ion adduct used for quantification:  $[M+NH_4]^+$

Representation of phosphatidylinositol (PI) identification information obtained with LipidSearch software e.g.  $[PI(38:5)+NH_4]^+$

Chromatogram

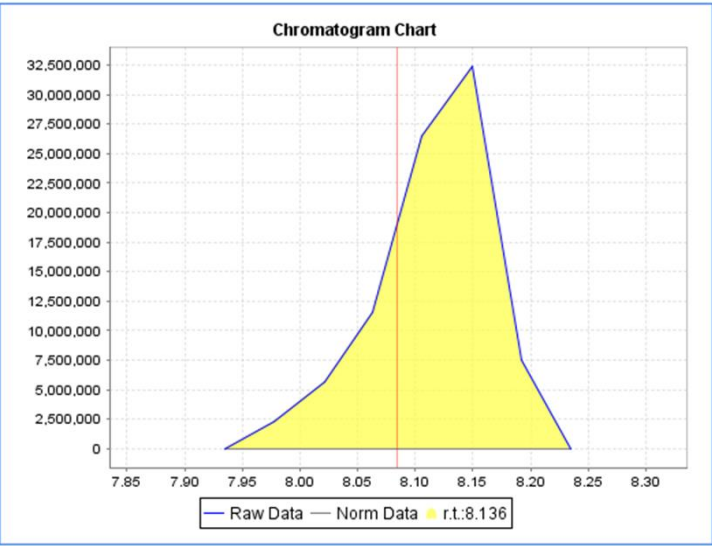

Spectrum

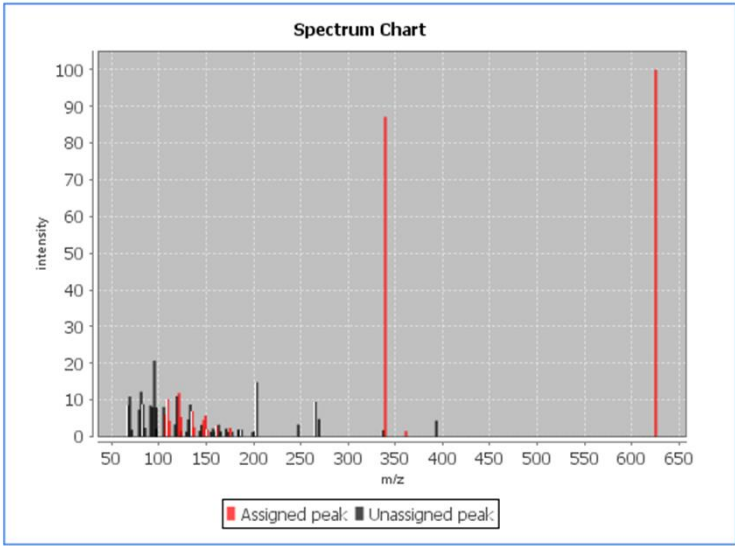

Match Lipid

| LipidIon                                           | M-Sc. | T-Sc. | Occ. | St.                                 |
|----------------------------------------------------|-------|-------|------|-------------------------------------|
| <input checked="" type="radio"/> PI(18:1_20:4)+NH4 | 17.2  | 0.4   | 55.3 | <input checked="" type="checkbox"/> |
| <input type="radio"/> PI(20:3_18:2)+NH4            | 7.7   | 0.4   | 36.3 | <input checked="" type="checkbox"/> |
| <input type="radio"/> PI(16:0_22:5)+NH4            | 4     | 0.4   | 35.9 | <input checked="" type="checkbox"/> |
| <input type="radio"/> PI(16:1_22:4)+NH4            | 4     | 0.4   | 35.9 | <input checked="" type="checkbox"/> |
| <input type="radio"/> PI(18:0_20:5)+NH4            | 4     | 0.4   | 35.9 | <input checked="" type="checkbox"/> |
| <input type="radio"/> PI(18:3_20:2)+NH4            | 4     | 0.4   | 35.9 | <input checked="" type="checkbox"/> |
| <input type="radio"/> PI(18:4_20:1)+NH4            | 4     | 0.4   | 35.9 | <input checked="" type="checkbox"/> |
| <input type="radio"/> PI(24:1_14:4)+NH4            | 4     | 0.4   | 35.9 | <input checked="" type="checkbox"/> |
| <input type="radio"/> PI(24:2_14:3)+NH4            | 4     | 0.4   | 35.9 | <input checked="" type="checkbox"/> |
| <input type="radio"/> PI(26:1_12:4)+NH4            | 4     | 0.4   | 35.9 | <input checked="" type="checkbox"/> |
| <input type="radio"/> PI(27:1_11:4)+NH4            | 4     | 0.4   | 35.9 | <input checked="" type="checkbox"/> |
| <input type="radio"/> PI(28:1_10:4)+NH4            | 4     | 0.4   | 35.9 | <input checked="" type="checkbox"/> |

Match Detail

| ObsMz    | Type | It.(%) | Frag.         | Delta(Da) |
|----------|------|--------|---------------|-----------|
| 184.0736 | MS2  | 1.935  | -             | -         |
| 185.1331 | MS2  | 1.895  | -             | -         |
| 187.1487 | MS2  | 1.936  | -             | -         |
| 199.1486 | MS2  | 1.269  | -             | -         |
| 201.1642 | MS2  | 1.5    | -             | -         |
| 203.1801 | MS2  | 14.867 | -             | -         |
| 247.2429 | MS2  | 3.324  | -             | -         |
| 265.2535 | MS2  | 9.52   | -             | -         |
| 269.2272 | MS2  | 4.808  | -             | -         |
| 337.2743 | MS2  | 1.79   | -             | -         |
| 339.2905 | MS2  | 87.173 | MG(18:1)-OH   | 0.0011    |
| 361.2748 | MS2  | 1.54   | MG(20:4)-OH   | 0.0011    |
| 393.3015 | MS2  | 4.379  | -             | -         |
| 625.5202 | MS2  | 100    | NL[PI,+NH4]+H | 0.0012    |

Copy



## Chromatogram

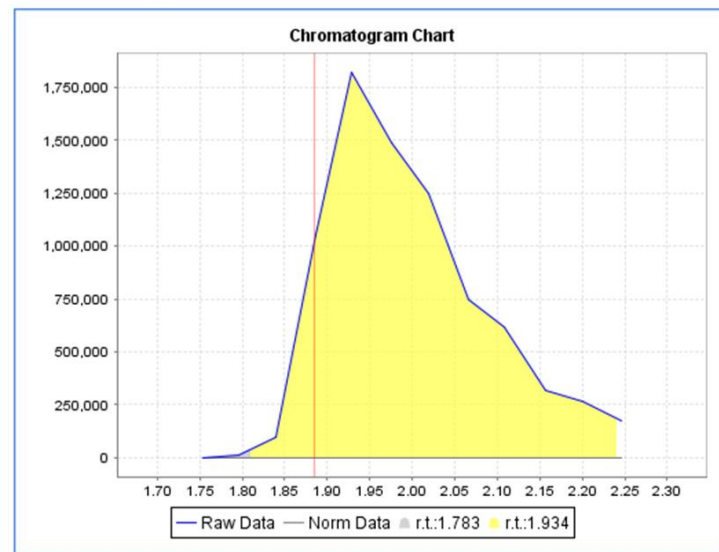

## Spectrum

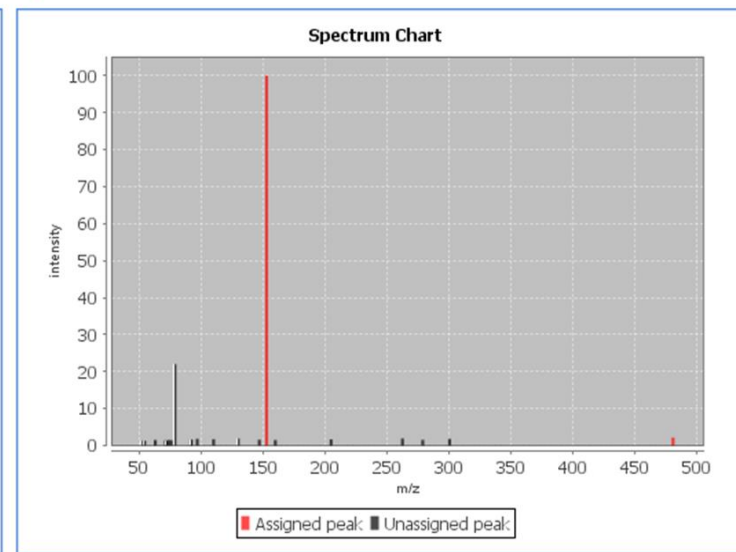

## Lysophosphatidylserine (LPS)

### Information

- Ionization: Negative- and positive-ion mode
- Main ion adducts used for identification:  $[M-H]^-$ ,  $[M+H]^+$  and  $[M+NH_4]^+$
- Identification (fragmentation) grade: A and B
- Main ion adduct used for quantification:  $[M-H]^-$

## Match Lipid

| LipidIon                                     | M-Sc. | T-Sc. | Occ. | St.                      |
|----------------------------------------------|-------|-------|------|--------------------------|
| <input checked="" type="radio"/> LPS(22:6)-H | 13.4  | 0.8   | 66.9 | <input type="checkbox"/> |

## Match Detail

| ObsMz    | Type | It.(%) | Frag.          | Delta(Da) |
|----------|------|--------|----------------|-----------|
| 78.9573  | MS2  | 22.01  | -              | -         |
| 91.8837  | MS2  | 1.591  | -              | -         |
| 92.1582  | MS2  | 1.629  | -              | -         |
| 96.9682  | MS2  | 1.832  | -              | -         |
| 110.261  | MS2  | 1.719  | -              | -         |
| 130.0197 | MS2  | 1.919  | -              | -         |
| 147.2038 | MS2  | 1.599  | -              | -         |
| 152.9947 | MS2  | 100    | GP-H3O         | -0.0011   |
| 160.1281 | MS2  | 1.488  | -              | -         |
| 205.06   | MS2  | 1.672  | -              | -         |
| 262.7444 | MS2  | 1.934  | -              | -         |
| 279.1598 | MS2  | 1.549  | -              | -         |
| 300.7773 | MS2  | 1.826  | -              | -         |
| 481.2378 | MS2  | 2.152  | M-Serine+H2O-H | 0.0017    |

Copy

Representation of lysophosphatidylserine (LPS) identification information obtained with LipidSearch software  
e.g.  $[LPS(22:6)-H]^-$

## Chromatogram

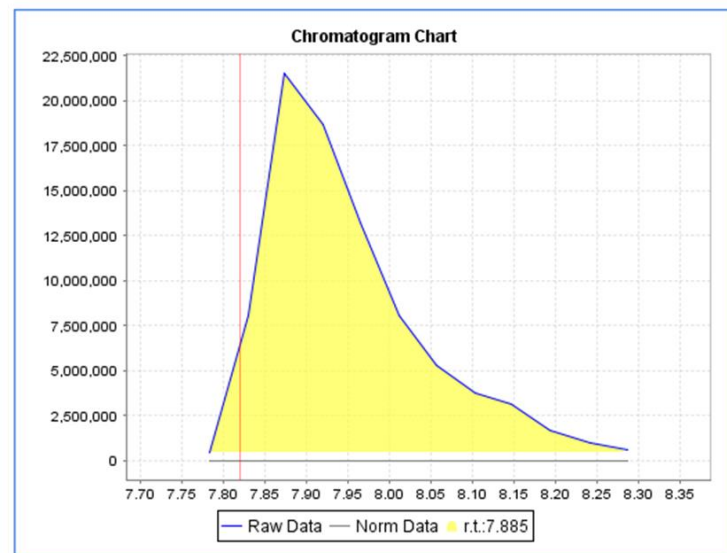

## Spectrum

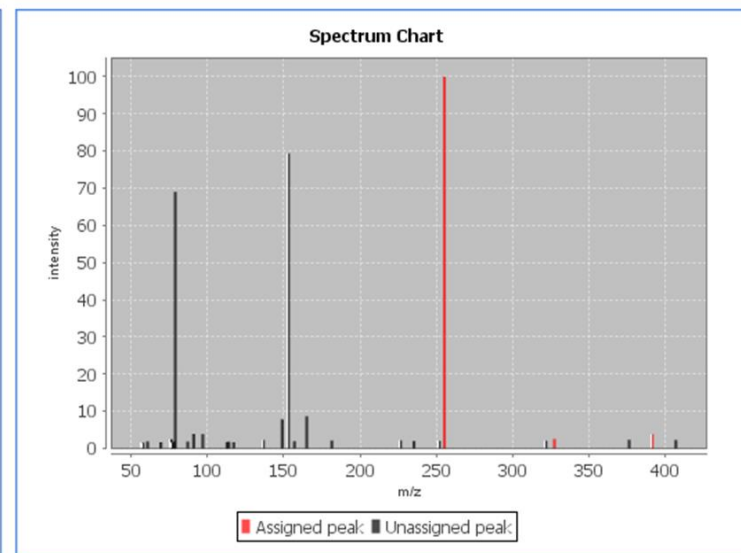

## Phosphatidylserine (PS)

### Information

- Ionization: Negative-ion mode
- Main ion adduct used for identification:  $[M-H]^-$
- Identification (fragmentation) grade: A and B
- Main ion adduct used for quantification:  $[M-H]^-$

## Match Lipid

| LipidIon                                         | M-Sc. | T-Sc. | Occ. | St.                                 |
|--------------------------------------------------|-------|-------|------|-------------------------------------|
| <input checked="" type="radio"/> PS(16:0_22:6)-H | 10    | 0.6   | 33.2 | <input checked="" type="checkbox"/> |

## Match Detail

| ObsMz    | Type | It.(%) | Frag.              | Delta(Da) |
|----------|------|--------|--------------------|-----------|
| 149.0084 | MS2  | 7.884  | -                  | -         |
| 152.9945 | MS2  | 79.355 | -                  | -         |
| 156.9806 | MS2  | 1.946  | -                  | -         |
| 165.0397 | MS2  | 8.666  | -                  | -         |
| 181.5265 | MS2  | 2.147  | -                  | -         |
| 226.4443 | MS2  | 2.178  | -                  | -         |
| 235.3255 | MS2  | 2.008  | -                  | -         |
| 251.8229 | MS2  | 2.036  | -                  | -         |
| 255.233  | MS2  | 100    | FA(16:0)-H         | 0.0001    |
| 321.593  | MS2  | 2.095  | -                  | -         |
| 327.2328 | MS2  | 2.593  | FA(22:6)-H         | -0.0001   |
| 376.2403 | MS2  | 2.324  | -                  | -         |
| 391.2271 | MS2  | 3.867  | LPS(16:0)-Serine-H | 0.0016    |
| 406.8138 | MS2  | 2.288  | -                  | -         |

Representation of phosphatidylserine (PS) identification information obtained with LipidSearch software e.g.  $[PS(38:6)-H]^-$

## Chromatogram

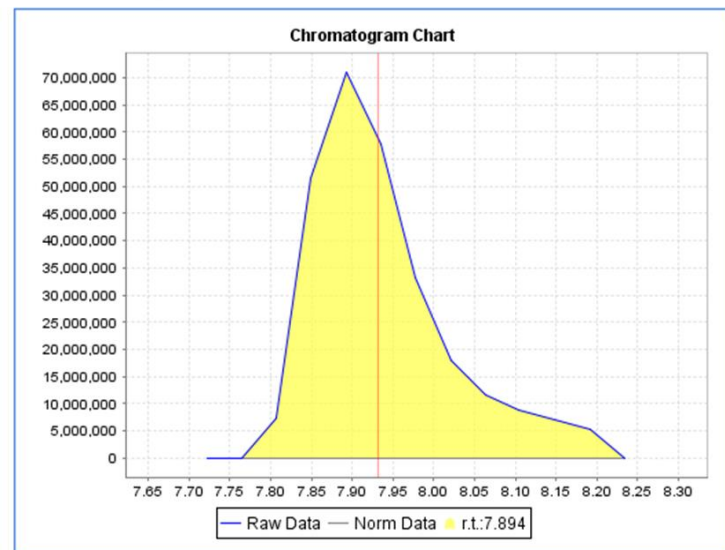

## Spectrum

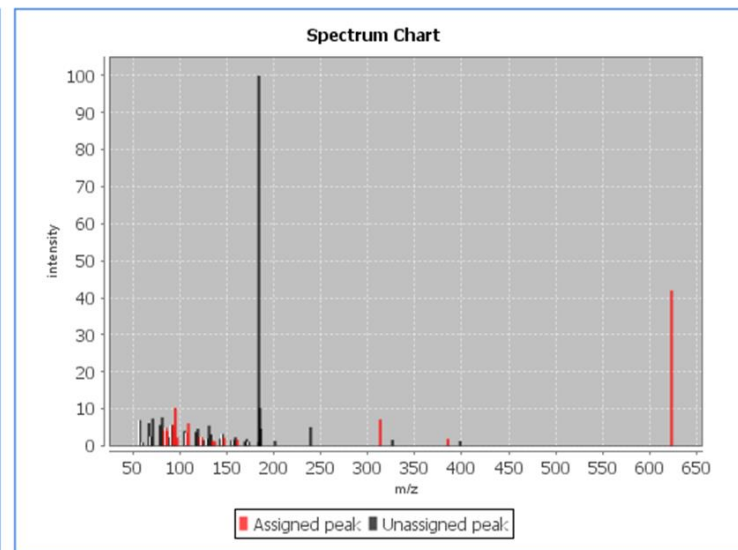

## Phosphatidylserine (PS)

### Information

- Ionization: Positive-ion mode
- Main ion adducts used for identification:  $[M+H]^+$ ,  $[M+NH_4]^+$  and  $[M+Na]^+$
- Identification (fragmentation) grade: A and B
- Main ion adducts used for quantification:  $[M+H]^+$  and  $[M+NH_4]^+$

## Match Lipid

| LipidIon                                         | M-Sc. | T-Sc. | Occ. | St.                      |
|--------------------------------------------------|-------|-------|------|--------------------------|
| <input checked="" type="radio"/> PS(16:0_22:6)+H | 10.3  | 0.7   | 33   | <input type="checkbox"/> |
| <input type="radio"/> PS(16:0_20:3)+Na           | 6.9   | 5.6   | 32.4 | <input type="checkbox"/> |
| <input type="radio"/> PS(16:1_22:5)+H            | 3.4   | 0.7   | 30.1 | <input type="checkbox"/> |
| <input type="radio"/> PS(18:1_20:5)+H            | 3.4   | 0.7   | 30.1 | <input type="checkbox"/> |
| <input type="radio"/> PS(18:2_20:4)+H            | 3.4   | 0.7   | 30.1 | <input type="checkbox"/> |
| <input type="radio"/> PS(18:3_20:3)+H            | 3.4   | 0.7   | 30.1 | <input type="checkbox"/> |
| <input type="radio"/> PS(18:4_20:2)+H            | 3.4   | 0.7   | 30.1 | <input type="checkbox"/> |
| <input type="radio"/> PS(14:0_22:3)+Na           | 3.4   | 5.6   | 30.1 | <input type="checkbox"/> |
| <input type="radio"/> PS(16:1_20:2)+Na           | 3.4   | 5.6   | 30.1 | <input type="checkbox"/> |
| <input type="radio"/> PS(18:0_18:3)+Na           | 3.4   | 5.6   | 30.1 | <input type="checkbox"/> |
| <input type="radio"/> PS(18:1_18:2)+Na           | 3.4   | 5.6   | 30.1 | <input type="checkbox"/> |

## Match Detail

| ObsMz    | Type | It. (%) | Frag.       | Delta(Da) |
|----------|------|---------|-------------|-----------|
| 161.1326 | MS2  | 1.694   | C12H17      | 0.0002    |
| 169.1013 | MS2  | 1.215   | -           | -         |
| 171.1168 | MS2  | 1.812   | -           | -         |
| 173.1325 | MS2  | 1.193   | -           | -         |
| 184.0052 | MS2  | 1.106   | -           | -         |
| 184.0734 | MS2  | 100     | -           | -         |
| 185.0766 | MS2  | 10.281  | -           | -         |
| 186.0777 | MS2  | 4.657   | -           | -         |
| 201.1637 | MS2  | 1.341   | -           | -         |
| 239.237  | MS2  | 5.072   | -           | -         |
| 313.274  | MS2  | 7.193   | MG(16:0)-OH | 0.0003    |
| 326.269  | MS2  | 1.652   | -           | -         |
| 385.2733 | MS2  | 1.941   | MG(22:6)-OH | -0.0004   |
| 398.2693 | MS2  | 1.333   | -           | -         |
| 623.5031 | MS2  | 41.97   | NL[PS]      | -0.0003   |

Representation of phosphatidylserine (PS) identification information obtained with LipidSearch software e.g.  $[PS(38:6)+H]^+$

| ObsMz    | Type | It. (%) | Frag.         | Delta(Da) |
|----------|------|---------|---------------|-----------|
| 57.0708  | MS2  | 7.011   |               |           |
| 60.0817  | MS2  | 1.011   |               |           |
| 67.0555  | MS2  | 6.142   |               |           |
| 69.0707  | MS2  | 2.589   |               |           |
| 71.0863  | MS2  | 7.392   |               |           |
| 79.0549  | MS2  | 5.635   |               |           |
| 81.0706  | MS2  | 7.758   |               |           |
| 83.0862  | MS2  | 4.109   | CGH11         | 0.0006    |
| 85.1018  | MS2  | 4.962   | CGH13         | 0.0007    |
| 86.097   | MS2  | 4.023   | CGH13 [isoto] | 0.9959    |
| 88.0398  | MS2  | 2.347   |               |           |
| 91.0548  | MS2  | 5.657   |               |           |
| 93.0703  | MS2  | 5.669   | C7H9          | 0.0005    |
| 95.0861  | MS2  | 10.301  | C7H11         | 0.0005    |
| 97.1017  | MS2  | 2.291   | C7H13         | 0.0005    |
| 105.0703 | MS2  | 4.069   |               |           |
| 107.0859 | MS2  | 3.644   | CGH11         | 0.0004    |
| 109.1015 | MS2  | 6.104   | CGH13         | 0.0004    |
| 117.0701 | MS2  | 3.778   |               |           |
| 119.0858 | MS2  | 4.671   |               |           |
| 121.1015 | MS2  | 2.482   | CGH13         | 0.0003    |
| 123.1171 | MS2  | 2.414   | CGH15         | 0.0002    |
| 125.0001 | MS2  | 1.595   |               |           |
| 129.07   | MS2  | 1.934   |               |           |
| 131.0857 | MS2  | 5.502   |               |           |
| 133.1013 | MS2  | 3.127   |               |           |
| 135.1168 | MS2  | 1.44    | C10H15        | 0         |
| 137.1326 | MS2  | 1.224   | C10H17        | 0.0001    |
| 143.0856 | MS2  | 1.908   |               |           |
| 145.1012 | MS2  | 3.285   |               |           |
| 147.1169 | MS2  | 2.214   | C11H15        | 0         |
| 155.0104 | MS2  | 1.53    |               |           |
| 157.1013 | MS2  | 1.612   |               |           |
| 159.1168 | MS2  | 2.321   |               |           |

Copy

# Cardiolipin (CL)

## Information

- Ionization: Negative- and positive-ion mode
- Main ion adducts used for identification:  $[M-H]^-$ ,  $[M-2H]^-$  and  $[M+H]^+$
- Identification (fragmentation) grade: A and B
- Main ion adduct used for quantification:  $[M-H]^-$

## Chromatogram

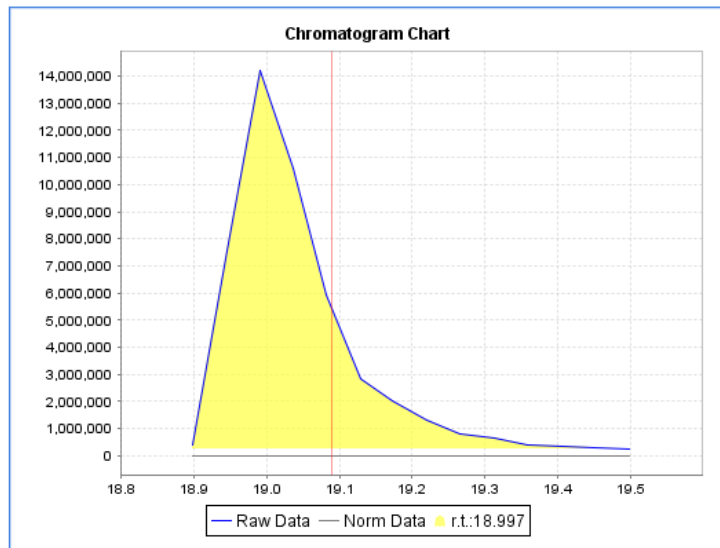

## Spectrum

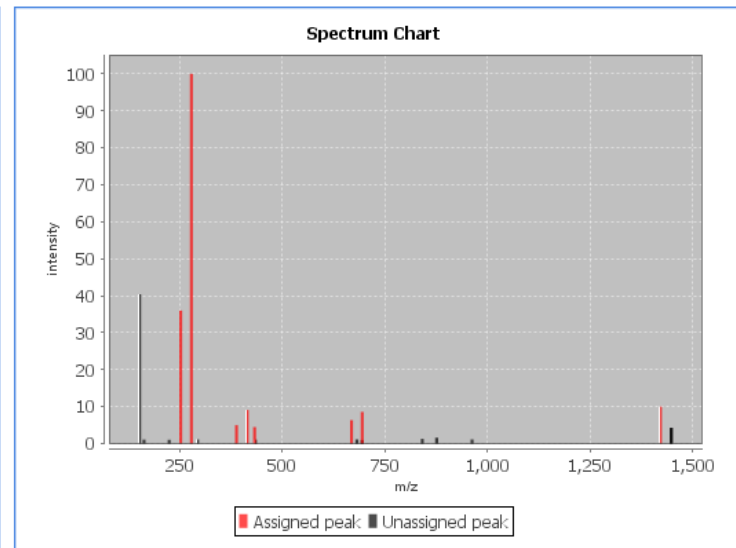

## Match Lipid

| LipidIon                                                   | M-Sc. | T-Sc. | Occ. | St.                      |
|------------------------------------------------------------|-------|-------|------|--------------------------|
| <input checked="" type="radio"/> CL(18:2_18:2_18:2_16:1)-H | 103.7 | 0.6   | 74.1 | <input type="checkbox"/> |
| <input type="radio"/> CL(18:2_16:1_18:2_18:2)-H            | 96.3  | 0.6   | 74.1 | <input type="checkbox"/> |
| <input type="radio"/> CL(18:2_16:1_16:1_20:3)-H            | 66.7  | 0.6   | 74.1 | <input type="checkbox"/> |
| <input type="radio"/> CL(12:3_24:1_18:2_16:1)-H            | 59.3  | 0.6   | 74.1 | <input type="checkbox"/> |
| <input type="radio"/> CL(22:4_14:0_18:2_16:1)-H            | 59.3  | 0.6   | 74.1 | <input type="checkbox"/> |
| <input type="radio"/> CL(20:4_16:0_18:2_16:1)-H            | 59.3  | 0.6   | 74.1 | <input type="checkbox"/> |
| <input type="radio"/> CL(18:3_18:1_18:2_16:1)-H            | 59.3  | 0.6   | 74.1 | <input type="checkbox"/> |
| <input type="radio"/> CL(18:4_18:0_18:2_16:1)-H            | 59.3  | 0.6   | 74.1 | <input type="checkbox"/> |
| <input type="radio"/> CL(22:3_14:1_18:2_16:1)-H            | 59.3  | 0.6   | 74.1 | <input type="checkbox"/> |

## Match Detail

| ObsMz     | Type | It.(%) | Frag.           | Delta(Da) |
|-----------|------|--------|-----------------|-----------|
| 253.2172  | MS2  | 35.984 | FA(16:1)-H      | -0.0001   |
| 279.2329  | MS2  | 100    | FA(18:2)-H      | -0.0001   |
| 294.3091  | MS2  | 1.134  | -               | -         |
| 389.2102  | MS2  | 4.998  | LPA(16:1)-H3O   | 0.0003    |
| 415.2253  | MS2  | 9.087  | LPA(18:2)-H3O   | -0.0003   |
| 433.236   | MS2  | 4.458  | LPA(18:2)-H     | -0.0001   |
| 435.4289  | MS2  | 1.093  | -               | -         |
| 669.4474  | MS2  | 6.323  | PA(18:2/16:1)-H | -0.0027   |
| 682.466   | MS2  | 1.132  | -               | -         |
| 695.1216  | MS2  | 1.011  | -               | -         |
| 695.4684  | MS2  | 8.591  | PA(18:2/18:2)-H | 0.0026    |
| 842.0308  | MS2  | 1.259  | -               | -         |
| 876.8726  | MS2  | 1.58   | -               | -         |
| 963.2915  | MS2  | 1.119  | -               | -         |
| 1421.9425 | MS2  | 10.015 | M-H             | -0.0068   |

Representation of cardiolipin (CL) identification information obtained with LipidSearch software e.g.  $[CL(70:7)-H]^-$

Copy

## Chromatogram

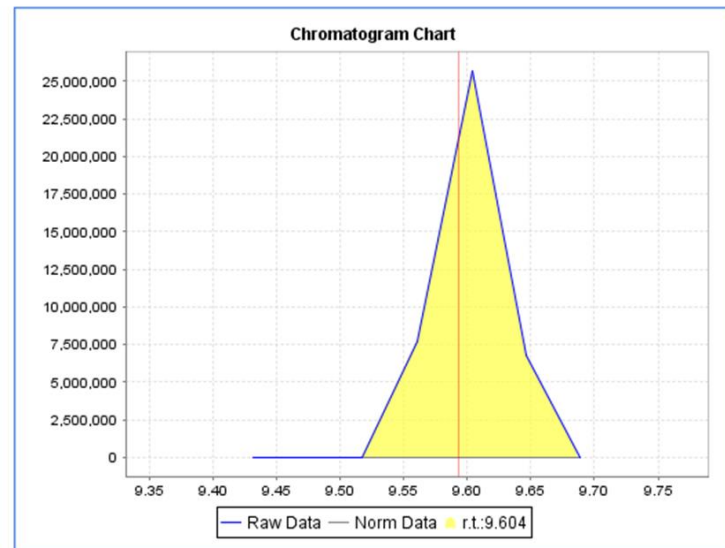

## Spectrum

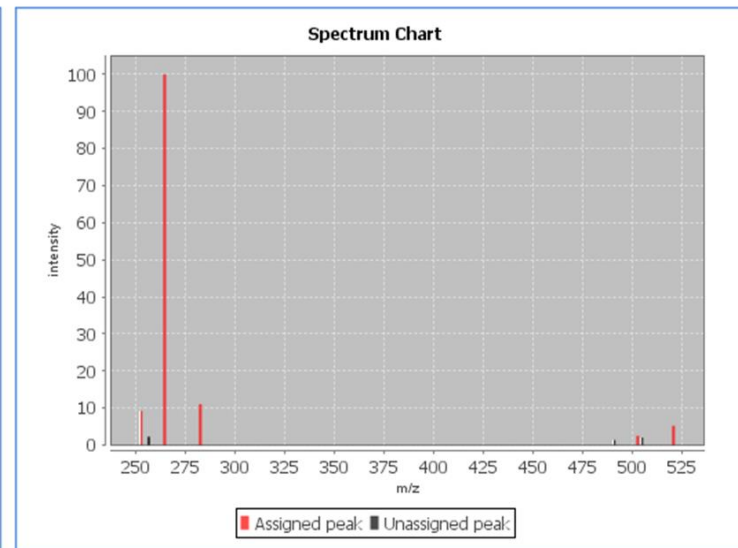

## Hexosylceramide (Hex1Cer)

### Information

- Ionization: Positive- and negative-ion mode
- Main ion adducts used for identification:  $[M+H]^+$ ,  $[M+H-H_2O]^+$ ,  $[M+H-2H_2O]^+$  and  $[M+HCOO]^-$
- Identification (fragmentation) grade: A, B and C
- Main ion adduct used for quantification:  $[M+H]^+$  and  $[M+HCOO]^-$

## Match Lipid

| LipidIon                                               | M-Sc. | T-Sc. | Occ. | St.                      |
|--------------------------------------------------------|-------|-------|------|--------------------------|
| <input checked="" type="radio"/> Hex1Cer(d18:1_16:0)+H | 47.9  | 0.3   | 95.7 | <input type="checkbox"/> |
| <input type="radio"/> Hex1Cer(t18:0_16:0)+H-H2O        | 37.5  | 3.6   | 93.8 | <input type="checkbox"/> |
| <input type="radio"/> Hex1Cer(d17:0_17:1)+H            | 3.8   | 0.3   | 12.7 | <input type="checkbox"/> |
| <input type="radio"/> Hex1Cer(m17:1_17:0+O)+H          | 3.8   | 0.3   | 12.7 | <input type="checkbox"/> |
| <input type="radio"/> Hex1Cer(d16:0_18:1)+H            | 2.3   | 0.3   | 7.5  | <input type="checkbox"/> |
| <input type="radio"/> Hex1Cer(d17:0_17:0+O)+H-H2O      | 2.2   | 3.6   | 10.9 | <input type="checkbox"/> |

## Match Detail

| ObsMz    | Type | It.(%) | Frag.               | Delta(Da) |
|----------|------|--------|---------------------|-----------|
| 252.2693 | MS2  | 9.295  | SPH(d18:1)-H2O-CH2O | 0.0008    |
| 256.2642 | MS2  | 2.283  | -                   | -         |
| 264.2694 | MS2  | 100    | SPH(d18:1)-2H2O     | 0.0008    |
| 282.28   | MS2  | 11.052 | SPH(d18:1)-H2O      | 0.0008    |
| 490.4992 | MS2  | 1.387  | -                   | -         |
| 502.4993 | MS2  | 2.513  | NL[G1,H2O]          | 0.001     |
| 504.515  | MS2  | 2.081  | -                   | -         |
| 520.5099 | MS2  | 5.247  | NL[G1]              | 0.0011    |

Representation of hexosylceramide (Hex1Cer) identification information obtained with LipidSearch software  
e.g.  $[\text{Hex1Cer(d34:1)+H}]^+$

Copy

## Chromatogram

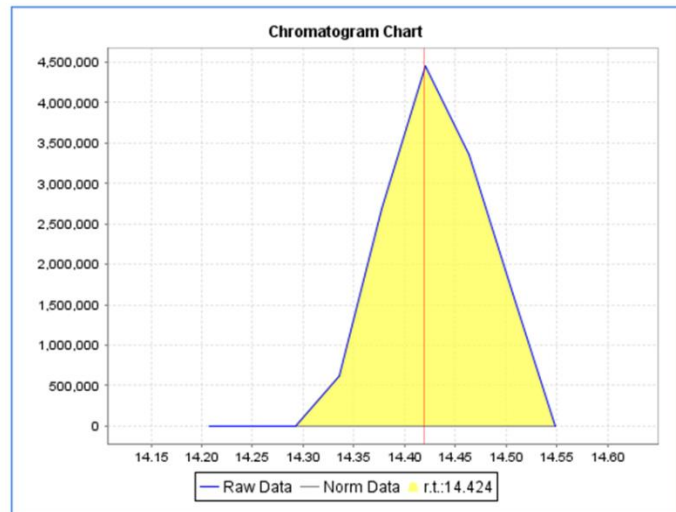

## Spectrum

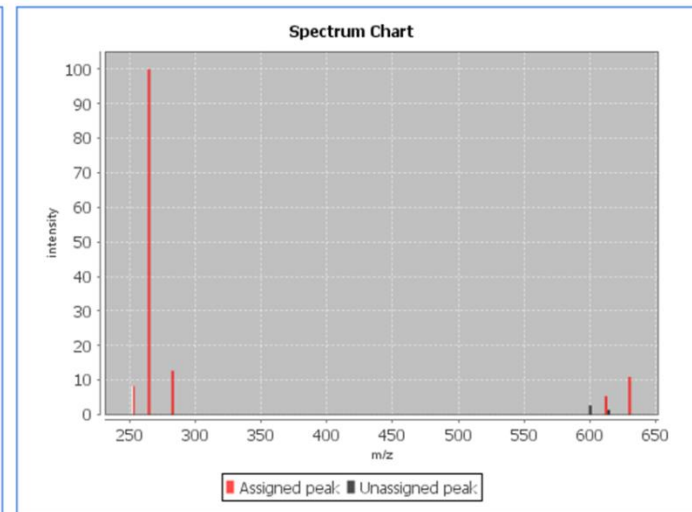

## Hexosylceramide (Hex2Cer)

### Information

- Ionization: Positive- and negative-ion mode
- Main ion adducts used for identification:  $[M+H]^+$ ,  $[M+H-H_2O]^+$ ,  $[M+H-2H_2O]^+$  and  $[M+HCOO]^-$
- Identification (fragmentation) grade: A, B and C
- Main ion adduct used for quantification:  $[M+H]^+$  and  $[M+HCOO]^-$

## Match Lipid

| LipidIon                                               | M-Sc. | T-Sc. | Occ. | St. |
|--------------------------------------------------------|-------|-------|------|-----|
| <input checked="" type="radio"/> Hex2Cer(d18:1_24:1)+H | 48.6  | 0.1   | 97.1 | ☒   |
| <input type="radio"/> Hex2Cer(t18:0_24:1)+H-H2O        | 37.3  | 1.1   | 93.3 | ☒   |
| <input type="radio"/> Hex2Cer(d19:2_23:0)+H            | 24.7  | 0.1   | 82.3 | ☒   |
| <input type="radio"/> Hex2Cer(d18:1_24:0)+H-H2O        | 15.7  | 1.1   | 78.5 | ☒   |
| <input type="radio"/> Hex2Cer(t18:0_24:0)+H-2H2O       | 7.1   | 3.1   | 70.7 | ☒   |
| <input type="radio"/> Hex2Cer(d17:0_25:2)+H            | 5.2   | 0.1   | 17.4 | ☒   |
| <input type="radio"/> Hex2Cer(d16:0_26:2)+H            | 2.3   | 0.1   | 11.6 | ☒   |
| <input type="radio"/> Hex2Cer(d16:1_26:1)+H            | 2.3   | 0.1   | 11.6 | ☒   |
| <input type="radio"/> Hex2Cer(d16:2_26:0)+H            | 2.3   | 0.1   | 11.6 | ☒   |
| <input type="radio"/> Hex2Cer(d17:1_25:1)+H            | 2.3   | 0.1   | 11.6 | ☒   |
| <input type="radio"/> Hex2Cer(d18:0_24:2)+H            | 2.3   | 0.1   | 11.6 | ☒   |
| <input type="radio"/> Hex2Cer(d18:2_24:0)+H            | 2.3   | 0.1   | 11.6 | ☒   |
| <input type="radio"/> Hex2Cer(d20:0_22:2)+H            | 2.3   | 0.1   | 11.6 | ☒   |
| <input type="radio"/> Hex2Cer(d20:1_22:1)+H            | 2.3   | 0.1   | 11.6 | ☒   |
| <input type="radio"/> Hex2Cer(d20:2_22:0)+H            | 2.3   | 0.1   | 11.6 | ☒   |

## Match Detail

| ObsMz    | Type | It. (%) | Frag.               | Delta (Da) |
|----------|------|---------|---------------------|------------|
| 252.2687 | MS2  | 8.262   | SPH(d18:1)-H2O-CH2C | 0.0001     |
| 264.2688 | MS2  | 100     | SPH(d18:1)-2H2O     | 0.0002     |
| 282.2794 | MS2  | 12.723  | SPH(d18:1)-H2O      | 0.0002     |
| 600.6071 | MS2  | 2.656   | -                   | -          |
| 612.6077 | MS2  | 5.385   | NL[G2,H2O]          | -0.0001    |
| 614.625  | MS2  | 1.407   | -                   | -          |
| 630.6184 | MS2  | 10.962  | NL[G2]              | 0.0001     |

Representation of hexosylceramide (Hex2Cer) identification information obtained with LipidSearch software

e.g.  $[\text{Hex2Cer}(d42:2)+H]^+$

### Chromatogram

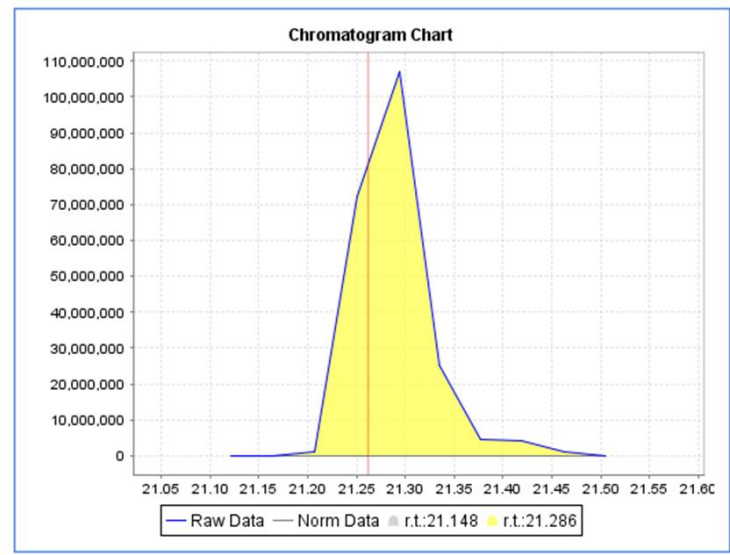

### Spectrum

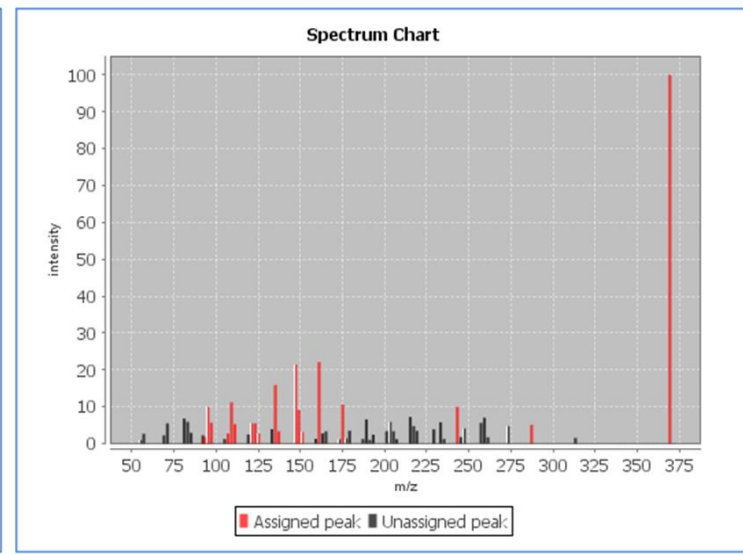

## Cholesteryl esters and Cholesterol (ChE)

### Information

- Ionization: Positive-ion mode
- Main ion adducts used for identification:  $[M+NH_4]^+$ ,  $[M+H-H_2O]^+$  and  $[M+H]^+$
- Identification (fragmentation) grade: A , B and C
- Main ion adducts used for quantification:
  - $[M+NH_4]^+$  in the case of cholesteryl esters
  - $[M+H-H_2O]^+$  in the case of cholesterol

### Match Lipid

| LipidIon                                       | M-Sc. | T-Sc. | Occ. | St.                                 |
|------------------------------------------------|-------|-------|------|-------------------------------------|
| <input checked="" type="radio"/> ChE(20:5)+NH4 | 18.5  | 20.2  | 66.1 | <input checked="" type="checkbox"/> |

  

| ObsMz    | Type | It. (%) | Frag.  | Delta(Da) |
|----------|------|---------|--------|-----------|
| 55.0552  | MS2  | 1.004   |        |           |
| 57.0709  | MS2  | 2.642   |        |           |
| 69.0707  | MS2  | 2.234   |        |           |
| 71.0864  | MS2  | 5.522   |        |           |
| 81.0707  | MS2  | 6.788   |        |           |
| 83.0863  | MS2  | 5.9     |        |           |
| 85.102   | MS2  | 2.932   |        |           |
| 92.1486  | MS2  | 2.244   |        |           |
| 93.0706  | MS2  | 1.757   | C7H9   | 0.0007    |
| 95.0862  | MS2  | 9.866   | C7H11  | 0.0006    |
| 97.1018  | MS2  | 5.66    | C7H13  | 0.0007    |
| 105.0704 | MS2  | 1.261   |        |           |
| 107.0861 | MS2  | 2.749   | C8H11  | 0.0006    |
| 109.1017 | MS2  | 11.248  | C8H13  | 0.0005    |
| 111.1174 | MS2  | 5.264   | C8H15  | 0.0005    |
| 119.086  | MS2  | 2.49    |        |           |
| 121.1016 | MS2  | 5.533   | C9H13  | 0.0005    |
| 123.1172 | MS2  | 5.516   | C9H15  | 0.0004    |
| 125.1329 | MS2  | 2.767   | C9H17  | 0.0004    |
| 133.1015 | MS2  | 3.914   |        |           |
| 135.1171 | MS2  | 15.943  | C10H15 | 0.0003    |
| 137.1328 | MS2  | 3.364   | C10H17 | 0.0003    |
| 147.1171 | MS2  | 21.468  | C11H15 | 0.0003    |
| 149.1328 | MS2  | 9.153   | C11H17 | 0.0003    |
| 151.1485 | MS2  | 3.143   | C11H19 | 0.0003    |
| 159.1172 | MS2  | 1.313   |        |           |
| 161.1327 | MS2  | 22.108  | C12H17 | 0.0003    |
| 163.1484 | MS2  | 2.78    |        |           |
| 165.1641 | MS2  | 3.327   |        |           |
| 173.1328 | MS2  | 1.165   |        |           |
| 175.1484 | MS2  | 10.618  | C13H19 | 0.0003    |
| 177.1642 | MS2  | 1.47    |        |           |
| 179.1798 | MS2  | 3.49    |        |           |
| 187.1486 | MS2  | 1.278   |        |           |
| 189.1641 | MS2  | 6.59    |        |           |
| 191.1796 | MS2  | 1.032   |        |           |
| 193.1954 | MS2  | 2.454   |        |           |
| 201.1641 | MS2  | 3.414   |        |           |
| 203.1798 | MS2  | 5.868   |        |           |
| 205.1955 | MS2  | 3.364   |        |           |
| 207.2111 | MS2  | 1.231   |        |           |
| 215.1799 | MS2  | 7.241   |        |           |

### Match Detail

| ObsMz    | Type | It. (%) | Frag.  | Delta(Da) |
|----------|------|---------|--------|-----------|
| 217.1956 | MS2  | 4.769   | -      | -         |
| 219.2113 | MS2  | 3.436   | -      | -         |
| 229.1957 | MS2  | 3.879   | -      | -         |
| 233.2269 | MS2  | 5.77    | -      | -         |
| 235.2425 | MS2  | 1.257   | -      | -         |
| 243.2112 | MS2  | 10.034  | C18H27 | 0.0005    |
| 245.2269 | MS2  | 1.782   | -      | -         |
| 247.2426 | MS2  | 4.11    | -      | -         |
| 257.227  | MS2  | 5.634   | -      | -         |
| 259.2427 | MS2  | 7.04    | -      | -         |
| 261.2585 | MS2  | 1.757   | -      | -         |
| 273.2584 | MS2  | 4.769   | -      | -         |
| 287.274  | MS2  | 5.072   | C21H35 | 0.0007    |
| 313.2901 | MS2  | 1.542   | -      | -         |
| 369.3523 | MS2  | 100     | M-FA   | 0.0008    |

Representation of cholesteryl esters (ChE) identification information obtained with LipidSearch software e.g.  $[ChE(20:5)+NH_4]^+$

## Chromatogram

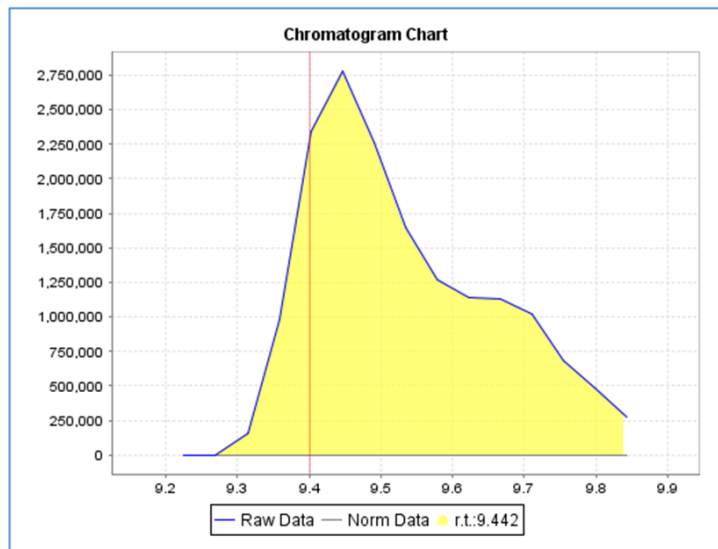

## Spectrum

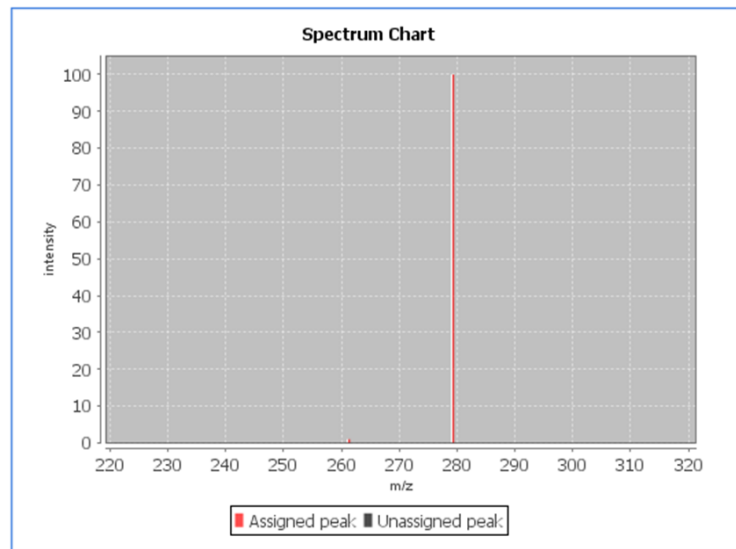

## Fatty acids (FA)

### Information

- Ionization: Negative-ion mode
- Main ion adduct used for identification:  $[M-H]^-$
- Identification (fragmentation) grade: A, B and C
- **Note:** A minimal number of free fatty acid species were identified with very low confidence (doesn't meet filtering criteria including diagnostic fragment ions, base retention time, etc.) and they were ignored for further analysis

## Match Lipid

| LipidIon   | M-Sc. | T-Sc. | Occ. | St.                                 |
|------------|-------|-------|------|-------------------------------------|
| FA(18:2)-H | 10    | 6.1   | 100  | <input checked="" type="checkbox"/> |

## Match Detail

| ObsMz    | Type | It.(%) | Frag.        | Delta(Da) |
|----------|------|--------|--------------|-----------|
| 261.2226 | MS2  | 1.046  | FA(18:2)-H3O | 0.0003    |
| 279.2329 | MS2  | 100    | M-H          | -0.0001   |



## Chromatogram

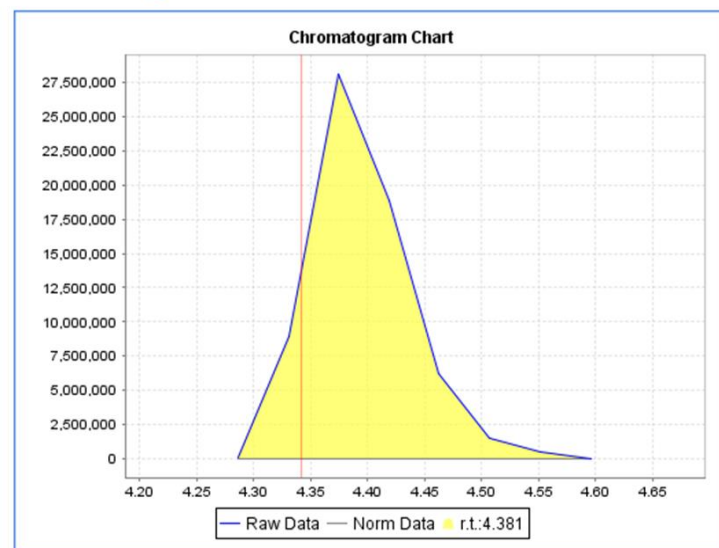

## Spectrum

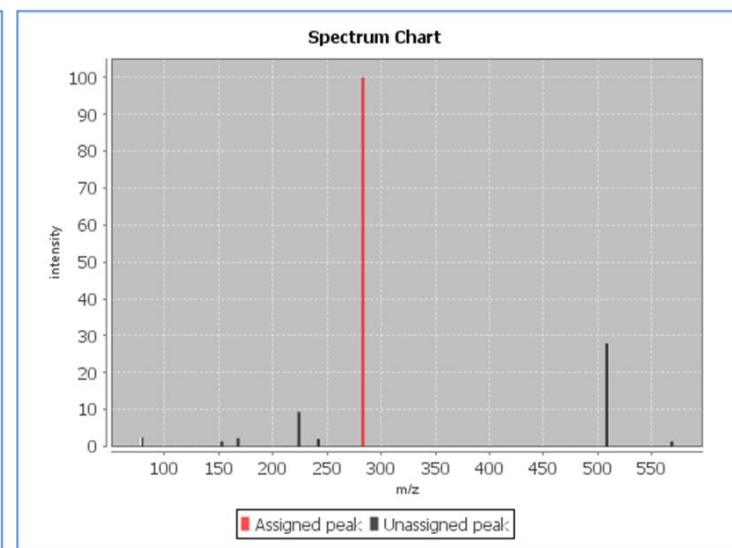

## Simple Glc series (CerG2GNAc1)

### Information

- Ionization: Negative-ion mode
- Main ion adduct used for identification:  $[M-H]^-$
- Identification (fragmentation) grade: A , B and C
- **Note:** A minimal number of CerG2GNAc1 species were identified with very low confidence (no diagnostic fragment ions) and they were ignored for further analysis

## Match Lipid

| LipidIon                                                  | M-Sc. | T-Sc. | Occ. | St.                      |
|-----------------------------------------------------------|-------|-------|------|--------------------------|
| <input checked="" type="radio"/> CerG2GNAc1(d18:1_18:0)-H | 6.8   | 5.3   | 68.1 | <input type="checkbox"/> |

## Match Detail

| ObsMz    | Type | It.(%) | Frag.      | Delta(Da) |
|----------|------|--------|------------|-----------|
| 78.9572  | MS2  | 2.434  | -          | -         |
| 152.9943 | MS2  | 1.381  | -          | -         |
| 168.0418 | MS2  | 2.267  | -          | -         |
| 224.0689 | MS2  | 9.384  | -          | -         |
| 242.0795 | MS2  | 1.991  | -          | -         |
| 283.2642 | MS2  | 100    | FA(18:0)-H | -0.0001   |
| 508.3404 | MS2  | 27.939 | -          | -         |
| 568.3603 | MS2  | 1.368  | -          | -         |

## Chromatogram

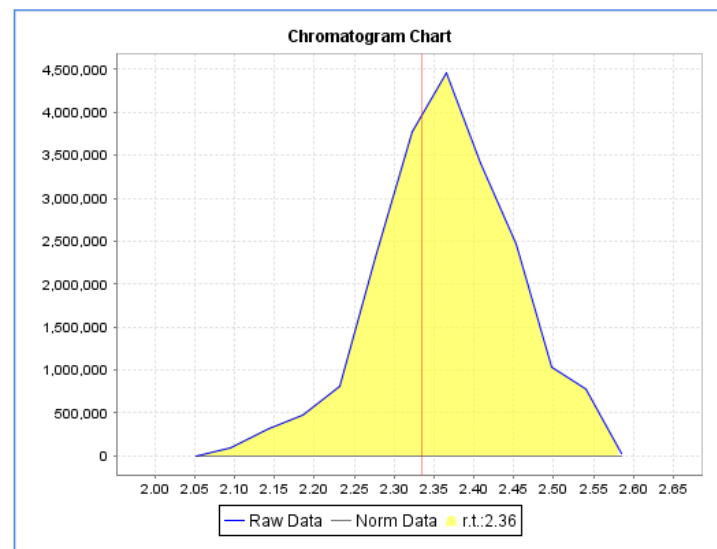

## Spectrum

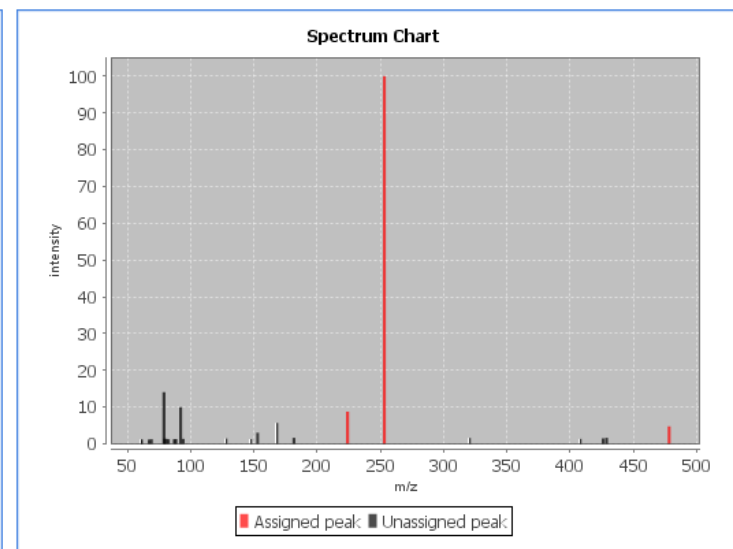

## Lysodimethylphosphatidylethanolamine (LdMePE)

### Information

- Ionization: Negative-ion mode
- Main ion adduct used for identification:  $[M-H]^-$
- Identification (fragmentation) grade: A, B and C
- **Note:** LdMePE lipid species share the same retention time and approximate equivalent abundance ratio values with identical acyl-chain length of LPC species. Possibly, in-source fragments [i.e., LPC-CH<sub>3</sub>] and they were ignored for further analysis<sup>5</sup>

## Match Lipid

| LipidIon                                        | M-Sc. | T-Sc. | Occ. | St.                                 |
|-------------------------------------------------|-------|-------|------|-------------------------------------|
| <input checked="" type="radio"/> LdMePE(16:1)-H | 13.2  | 0.1   | 66   | <input checked="" type="checkbox"/> |
| <input type="radio"/> LPC(16:1)-CH3             | 6.1   | 0.1   | 60.6 | <input checked="" type="checkbox"/> |

## Match Detail

| ObsMz    | Type | It.(%) | Frag.       | Delta(Da) |
|----------|------|--------|-------------|-----------|
| 88.2889  | MS2  | 1.311  | -           | -         |
| 92.1381  | MS2  | 9.991  | -           | -         |
| 94.2195  | MS2  | 1.372  | -           | -         |
| 127.8928 | MS2  | 1.466  | -           | -         |
| 147.4395 | MS2  | 1.304  | -           | -         |
| 152.9945 | MS2  | 3.023  | -           | -         |
| 168.0419 | MS2  | 5.703  | -           | -         |
| 181.6368 | MS2  | 1.65   | -           | -         |
| 224.0692 | MS2  | 8.763  | LdMeGPE-H3O | -0.0002   |
| 253.2173 | MS2  | 100    | FA(16:1)-H  | 0         |
| 320.3389 | MS2  | 1.603  | -           | -         |
| 407.8658 | MS2  | 1.384  | -           | -         |
| 426.0836 | MS2  | 1.479  | -           | -         |
| 428.7619 | MS2  | 1.662  | -           | -         |
| 478.2966 | MS2  | 4.743  | M-H         | 0.0027    |

Copy

## Chromatogram

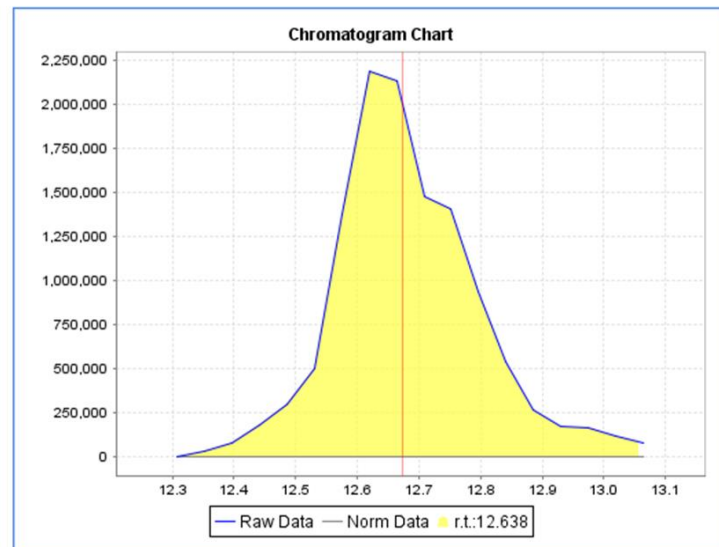

## Spectrum

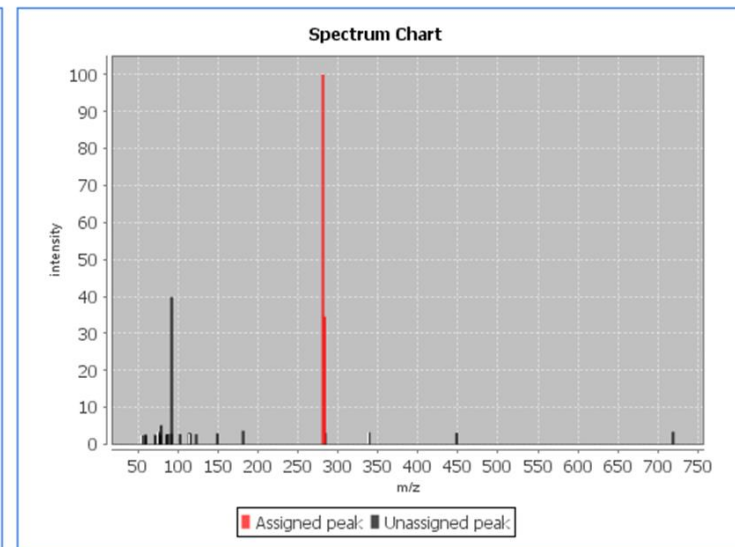

# Dimethylphosphatidylethanolamine (dMePE)

## Information

- Ionization: Negative-ion mode
- Main ion adducts used for identification:  $[M-H]^-$
- Identification (fragmentation) grade: A , B and C
- **Note:** dMePE lipid species share the same retention time and approximate equivalent abundance ratio values with identical acyl-chain length of PC species. Possibly, in-source fragments [i.e., PC-CH<sub>3</sub>] and they were ignored for further analysis<sup>5</sup>

## Match Lipid

| LipidIon                                            | M-Sc. | T-Sc. | Occ. | St.                      |
|-----------------------------------------------------|-------|-------|------|--------------------------|
| <input checked="" type="radio"/> dMePE(18:0_18:1)-H | 11.3  | 0     | 56.6 | <input type="checkbox"/> |
| <input type="radio"/> PC(18:0_18:1)-CH3             | 11.3  | 0.2   | 56.6 | <input type="checkbox"/> |
| <input type="radio"/> PE(20:0_18:1)-H               | 4.2   | 2.3   | 42.1 | <input type="checkbox"/> |

## Match Detail

| ObsMz    | Type | It.(%) | Frag.      | Delta(Da) |
|----------|------|--------|------------|-----------|
| 87.1767  | MS2  | 2.799  | -          | -         |
| 91.7059  | MS2  | 2.904  | -          | -         |
| 92.1372  | MS2  | 39.864 | -          | -         |
| 102.5491 | MS2  | 2.763  | -          | -         |
| 114.3476 | MS2  | 3.185  | -          | -         |
| 115.1927 | MS2  | 2.846  | -          | -         |
| 122.8362 | MS2  | 2.75   | -          | -         |
| 149.2936 | MS2  | 2.997  | -          | -         |
| 181.5578 | MS2  | 3.7    | -          | -         |
| 281.2488 | MS2  | 100    | FA(18:1)-H | 0.0002    |
| 283.2641 | MS2  | 34.533 | FA(18:0)-H | -0.0002   |
| 283.9593 | MS2  | 3.062  | -          | -         |
| 338.8096 | MS2  | 3.275  | -          | -         |
| 448.3401 | MS2  | 3.15   | -          | -         |
| 719.0166 | MS2  | 3.42   | -          | -         |

Copy
