# Supplementary material for: Sequential lipidomic, metabolomic, and proteomic analyses of serum, liver, and heart tissue specimens from peroxisomal biogenesis factor 11α knockout mice
Source: PubMed Central journal article supplement (PMC8821073; doi:10.1007/s00216-021-03860-0), 2022-01-27
Supplement: 216_2021_3860_MOESM6_ESM.pdf [file 216_2021_3860_MOESM6_ESM.pdf]

**Electronic Supplementary Material\_6; Data file S2**

**Sequential lipidomic, metabolomic and proteomic analyses of serum, liver and heart tissue specimens from peroxisomal biogenesis factor 11 $\alpha$  knockout mice**

Vannuruswamy Garikapati<sup>1,2</sup>, Claudia Colasante<sup>2</sup>, Eveline Baumgart-Vogt<sup>2\*</sup>, Bernhard Spengler<sup>1\*</sup>

<sup>1</sup>Institute of Inorganic and Analytical Chemistry, Justus Liebig University Giessen, 35392 Giessen, Germany

<sup>2</sup>Institute for Anatomy and Cell Biology II, Division of Medical Cell Biology, Justus Liebig University Giessen, 35392 Giessen, Germany

**Proteomics raw data quality evaluation using RawMeat (v2.1) software**

**Wild type control and peroxisomal biogenesis factor 11 $\alpha$  knockout mouse liver proteome**

# Base peak intensity from full MS scans as a function of retention time

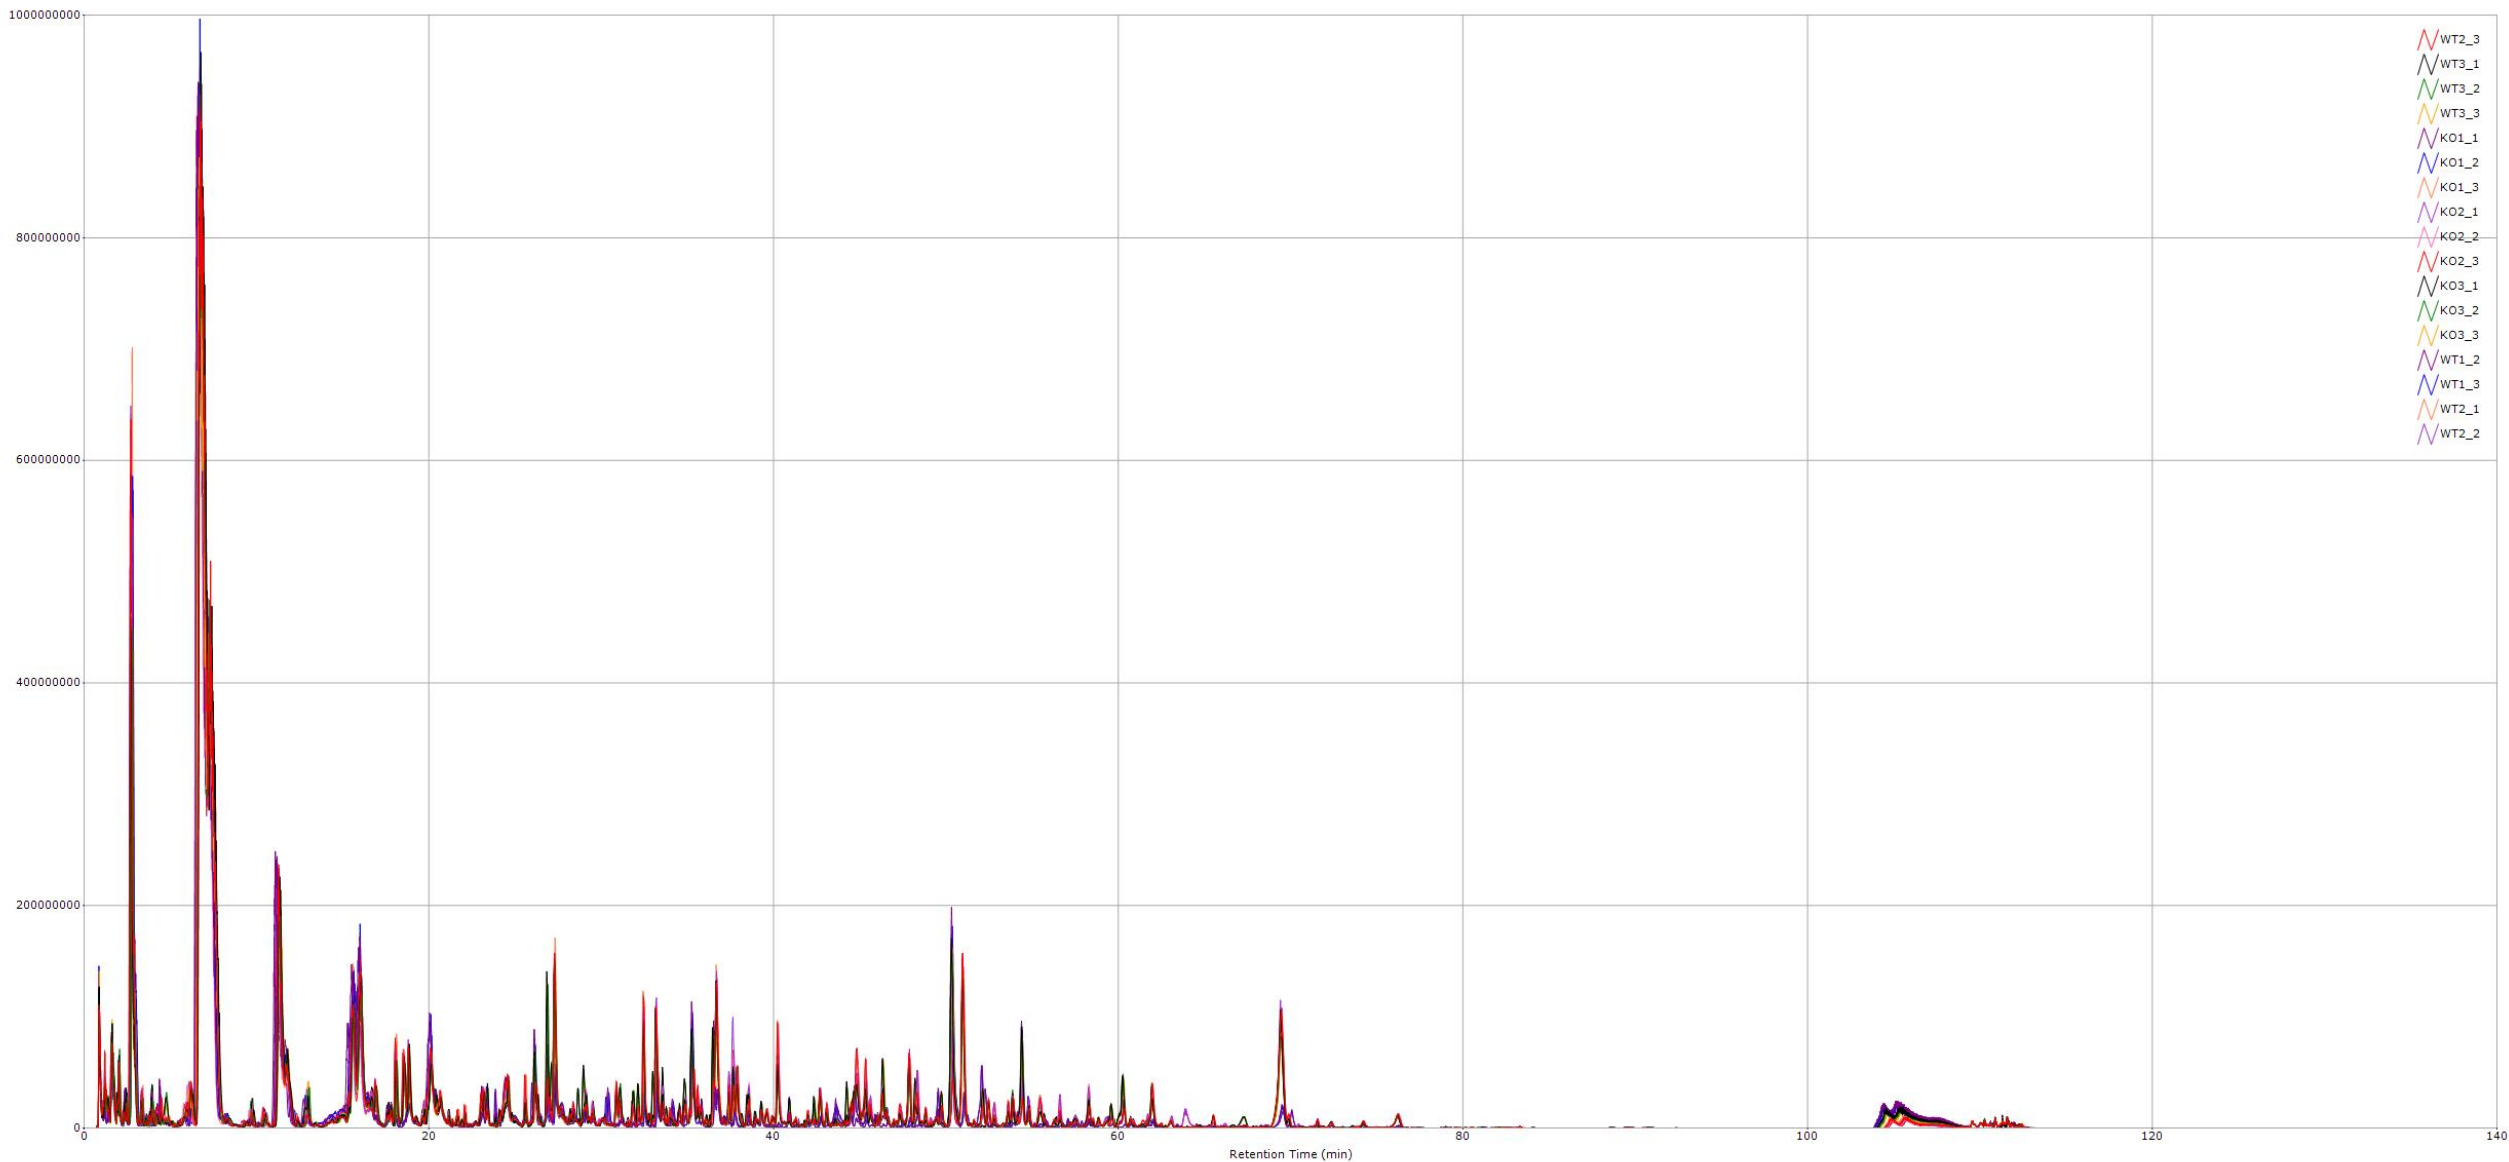

Horizontal axis (X-axis): Retention time in minutes; Vertical axis (Y-axis): Base peak intensity per full MS scans

# Number of MS2 scans in between consecutive scans

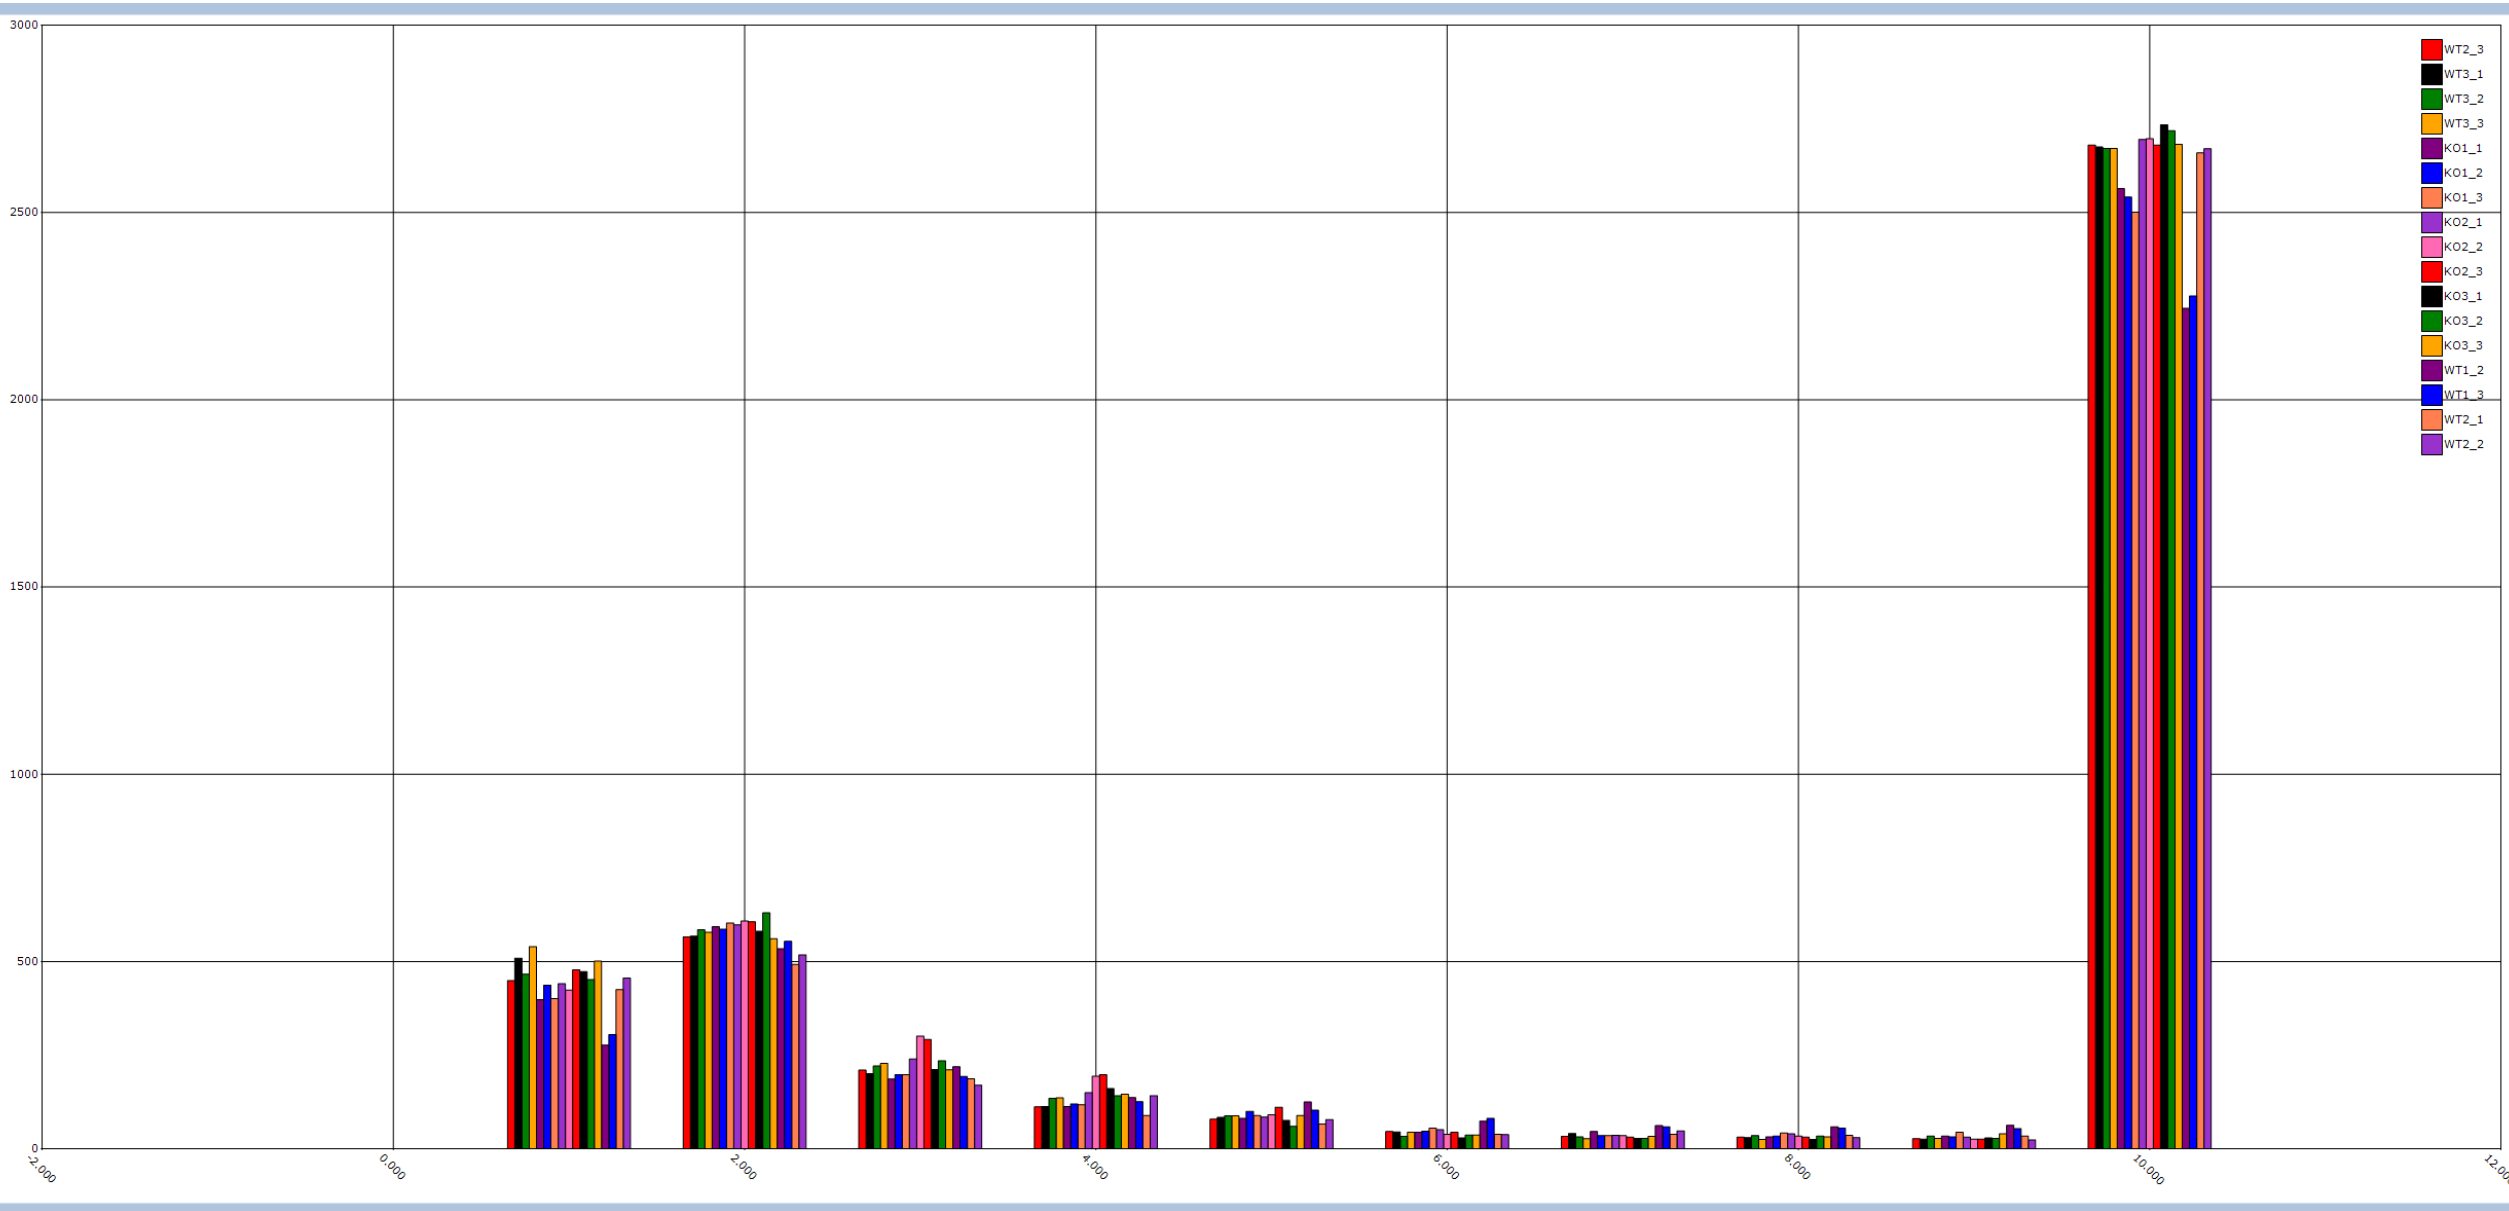

Horizontal axis (X-axis): Number of MS2 scans in between consecutive scans; Vertical axis (Y-axis): Frequency

# MS2 charge distribution

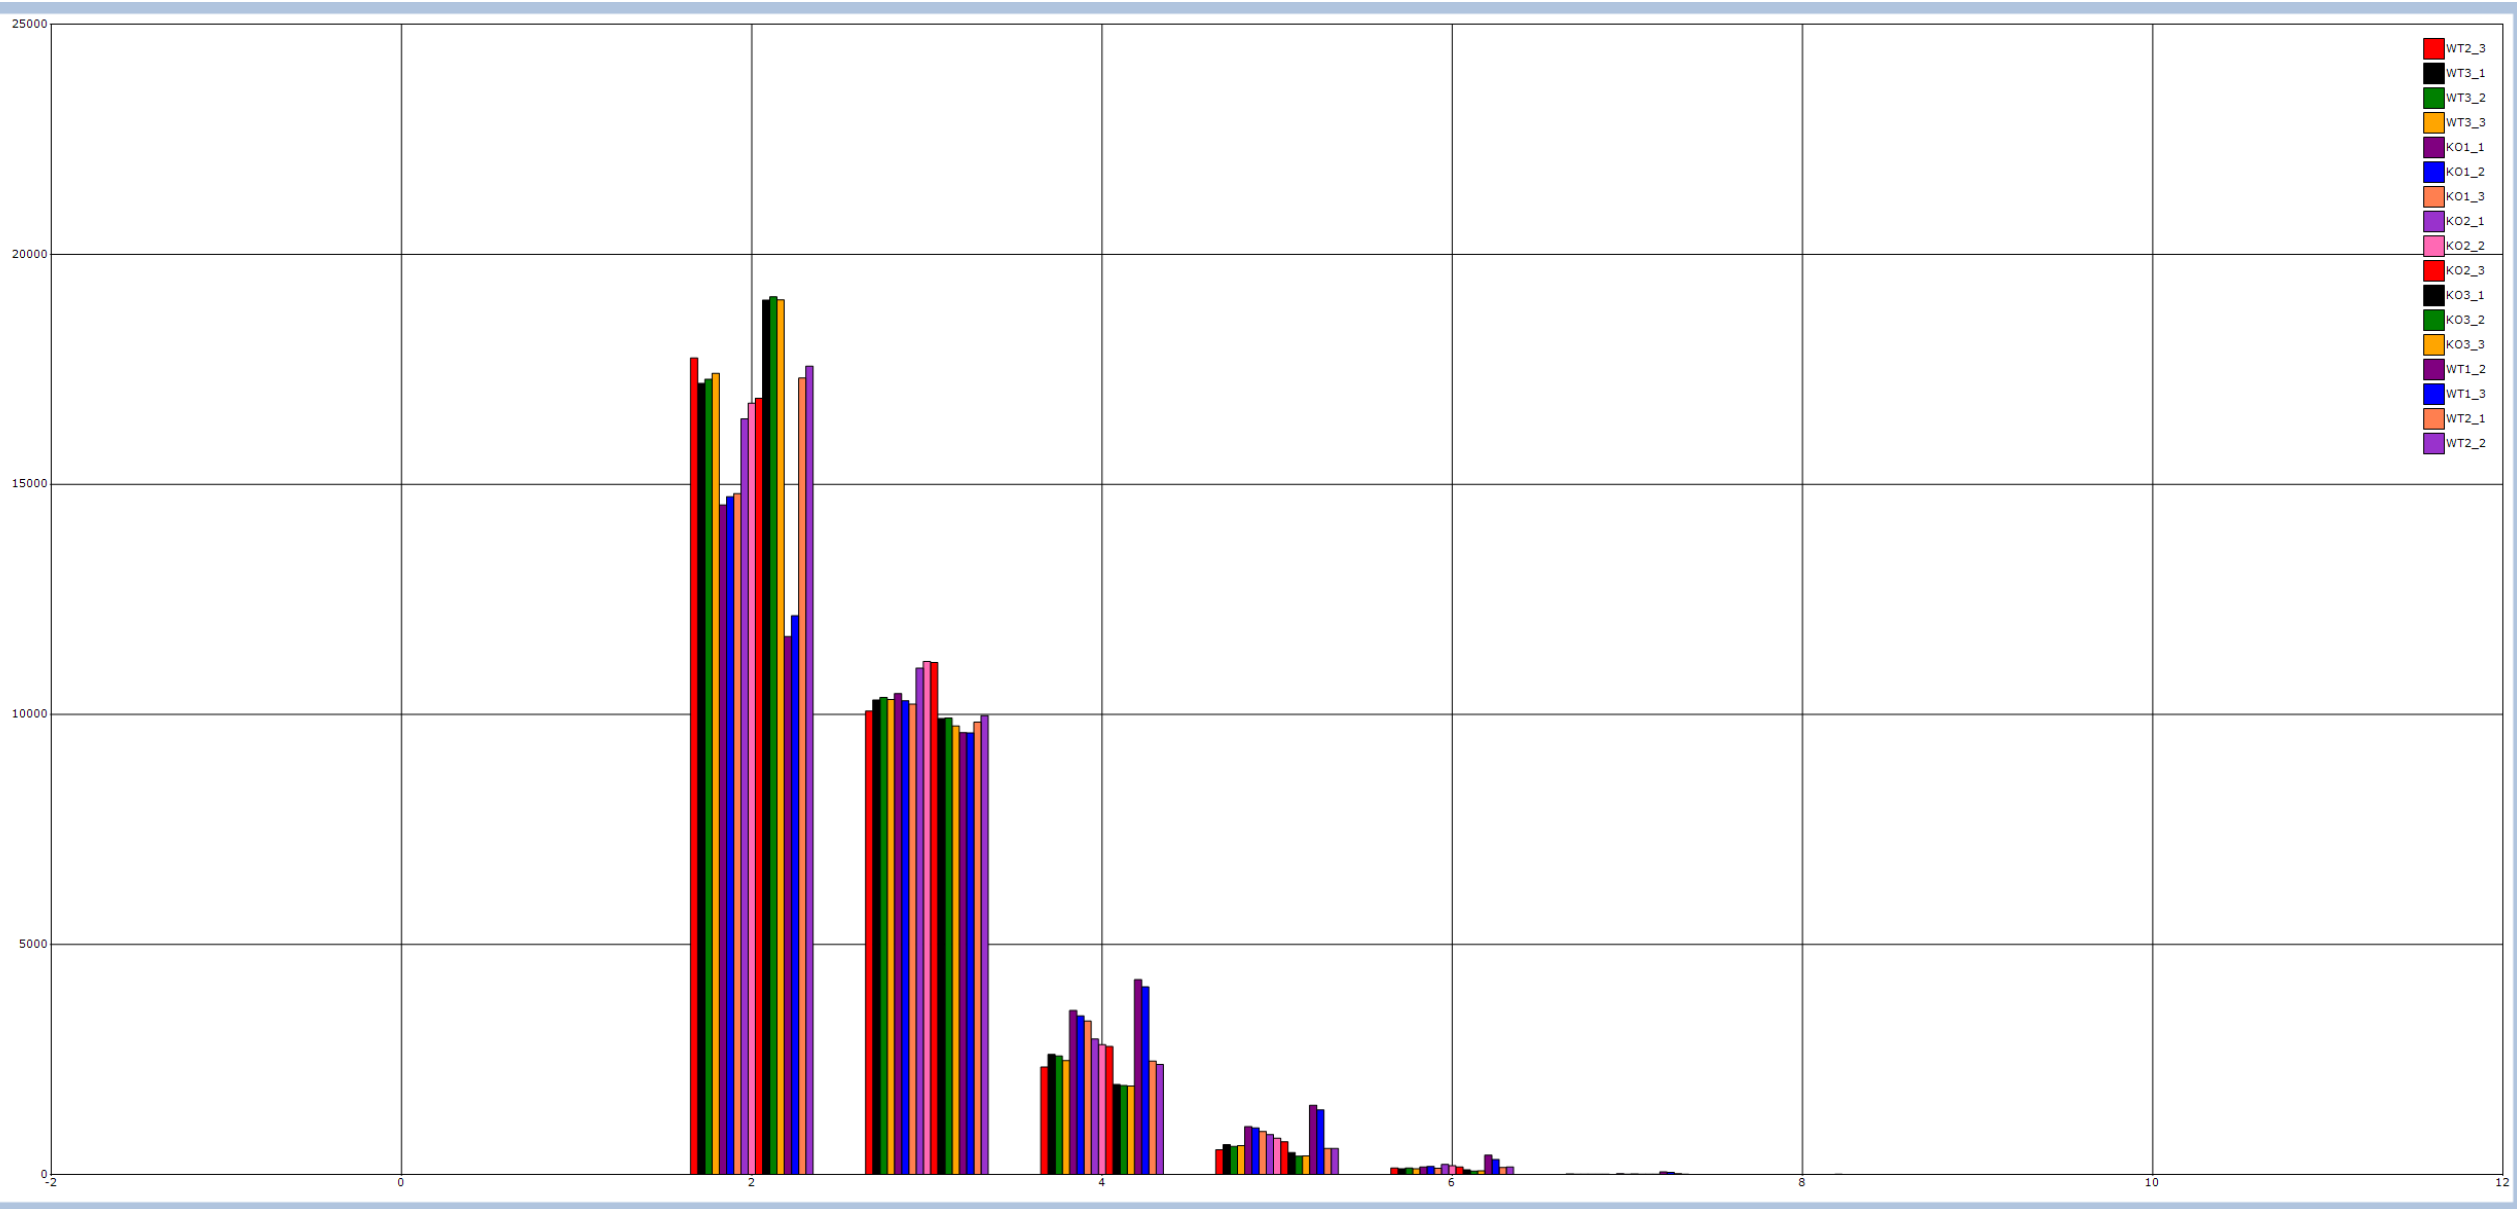

Horizontal axis (X-axis): Precursor ion charge; Vertical axis (Y-axis): Counts per charge

**Proteomics raw data quality evaluation using RawMeat (v2.1) software**

**Wild type control and peroxisomal biogenesis factor 11 $\alpha$  knockout mouse heart proteome**

# Base peak intensity from full MS scans as a function of retention time

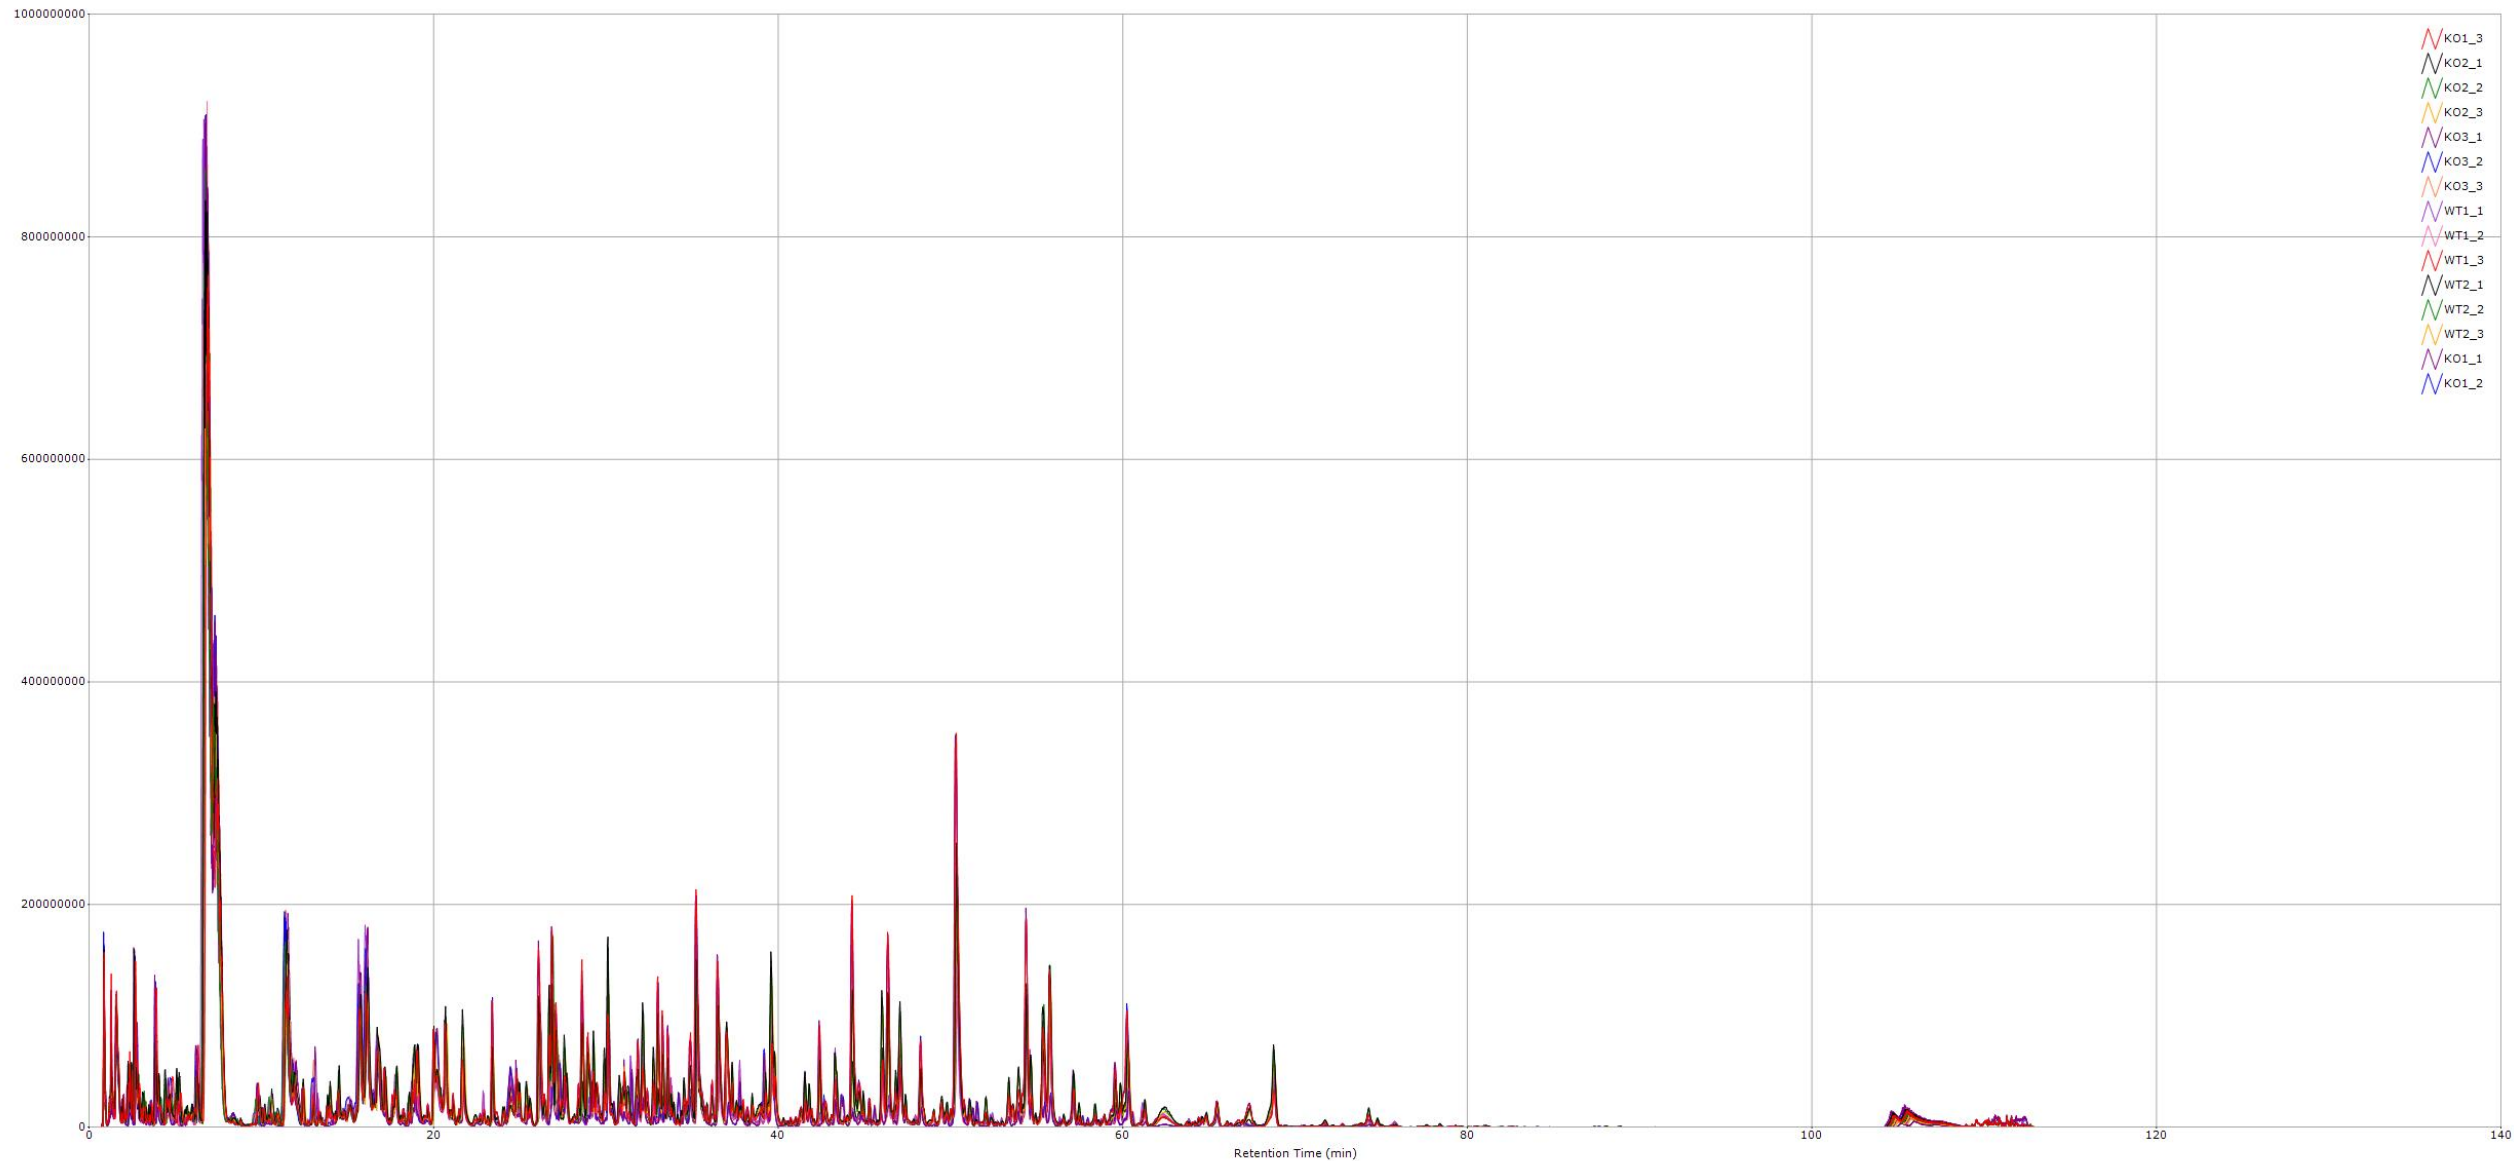

Horizontal axis (X-axis): Retention time in minutes; Vertical axis (Y-axis): Base peak intensity per full MS scans

# Number of MS2 scans in between consecutive scans

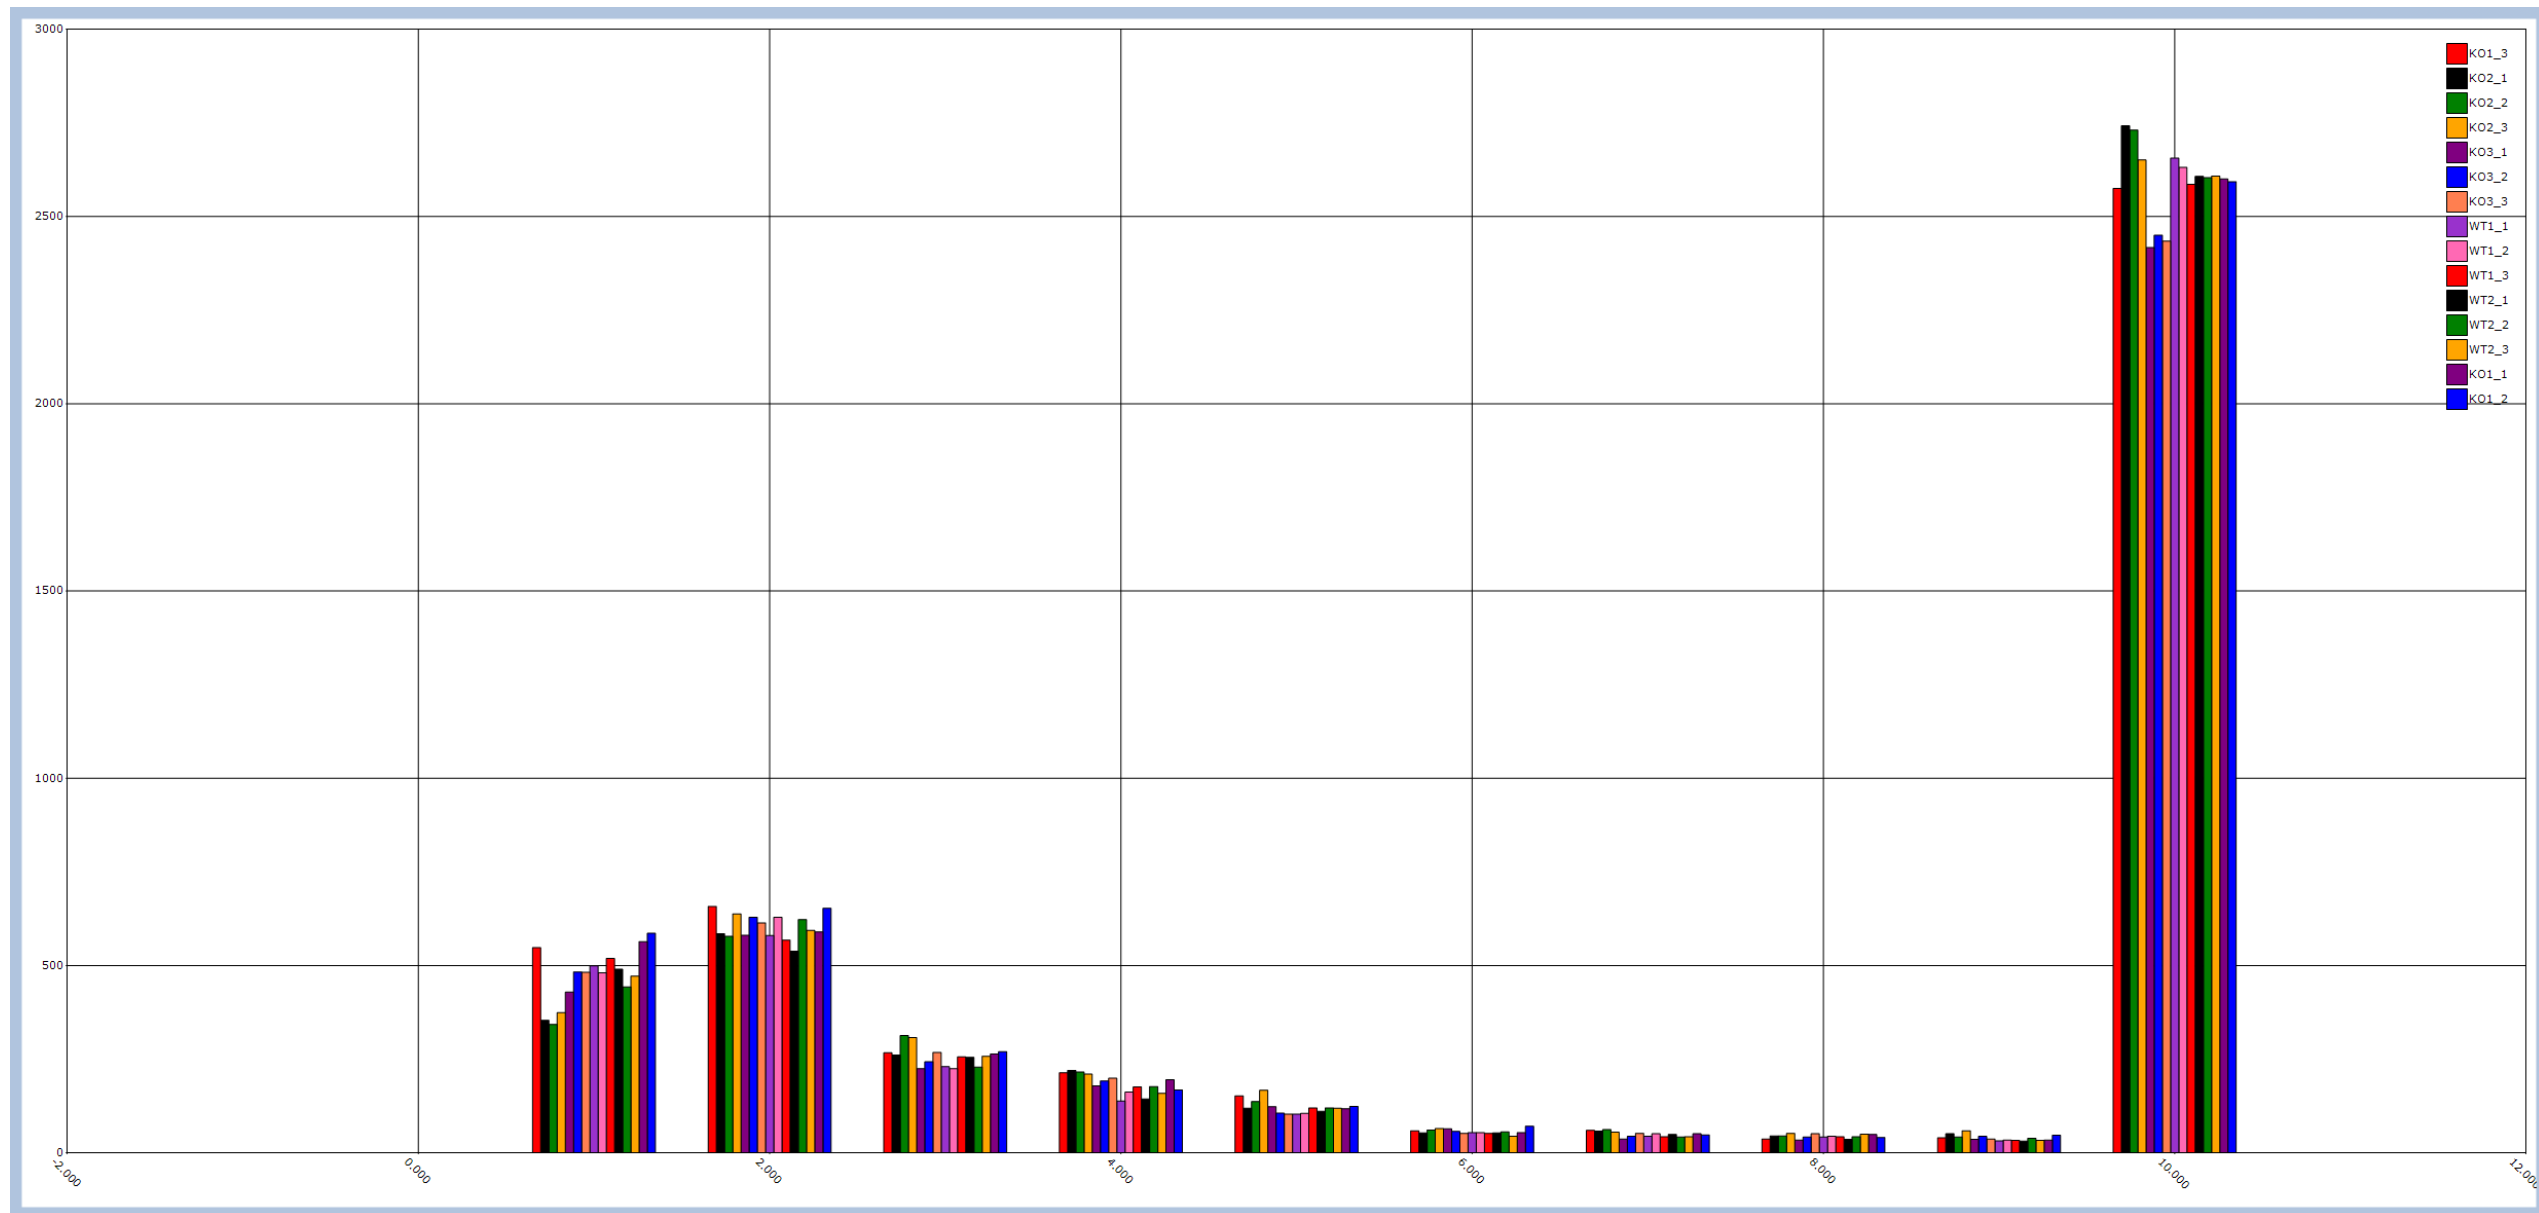

Horizontal axis (X-axis): Number of MS2 scans in between consecutive scans; Vertical axis (Y-axis): Frequency



# MS2 charge distribution

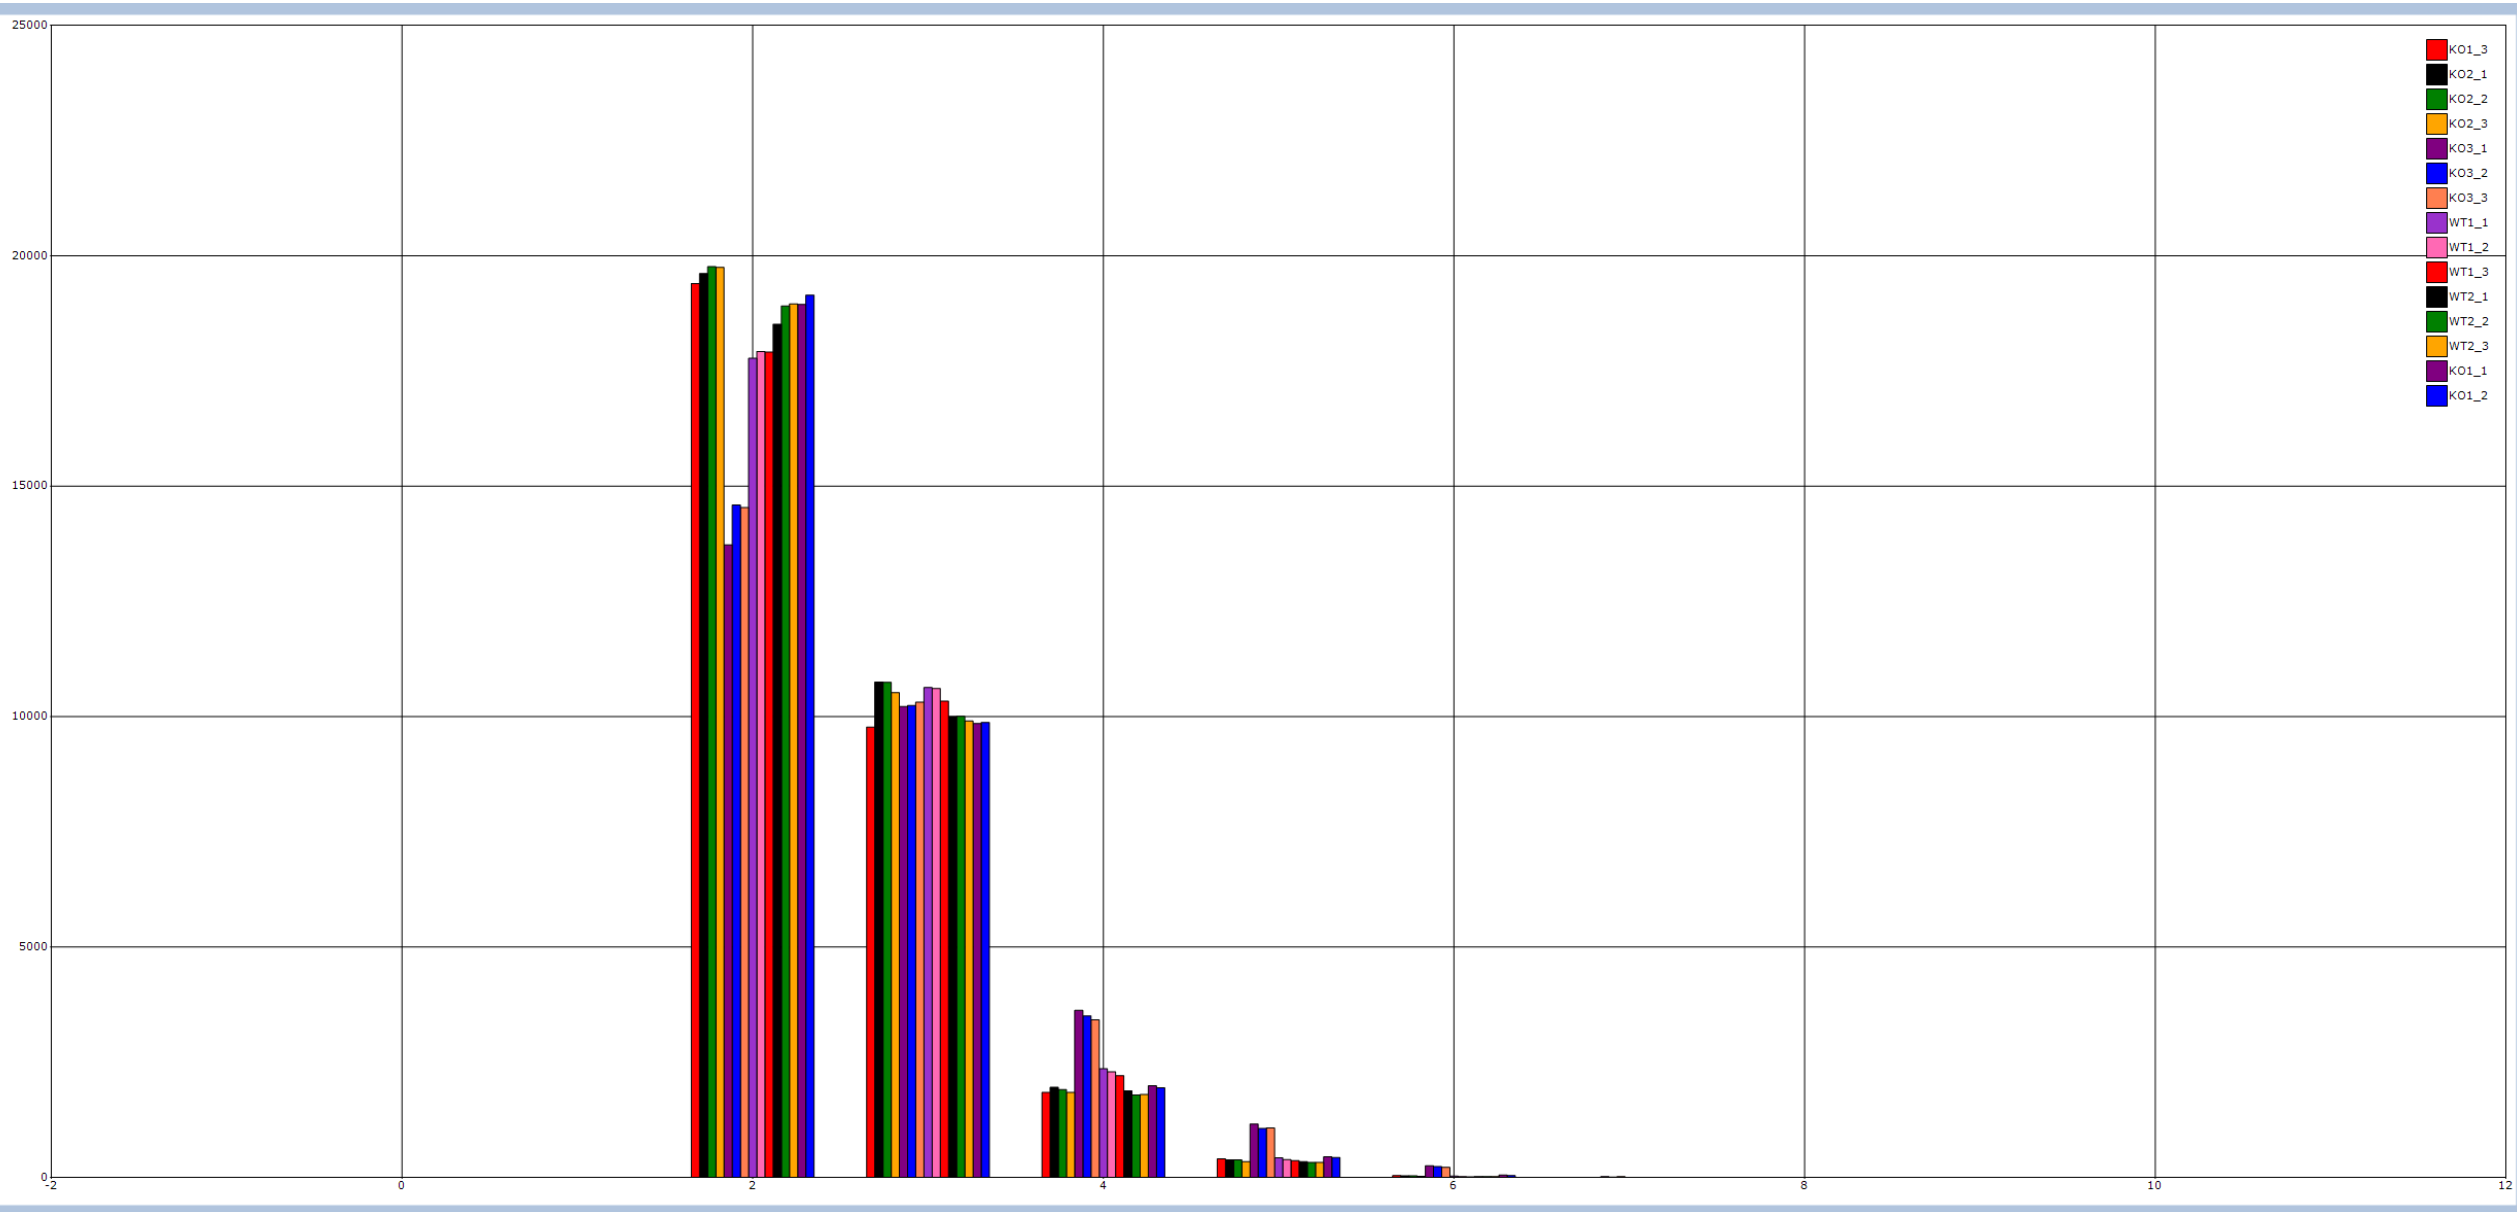

Horizontal axis (X-axis): Precursor ion charge; Vertical axis (Y-axis): Counts per charge

# Principal component analysis

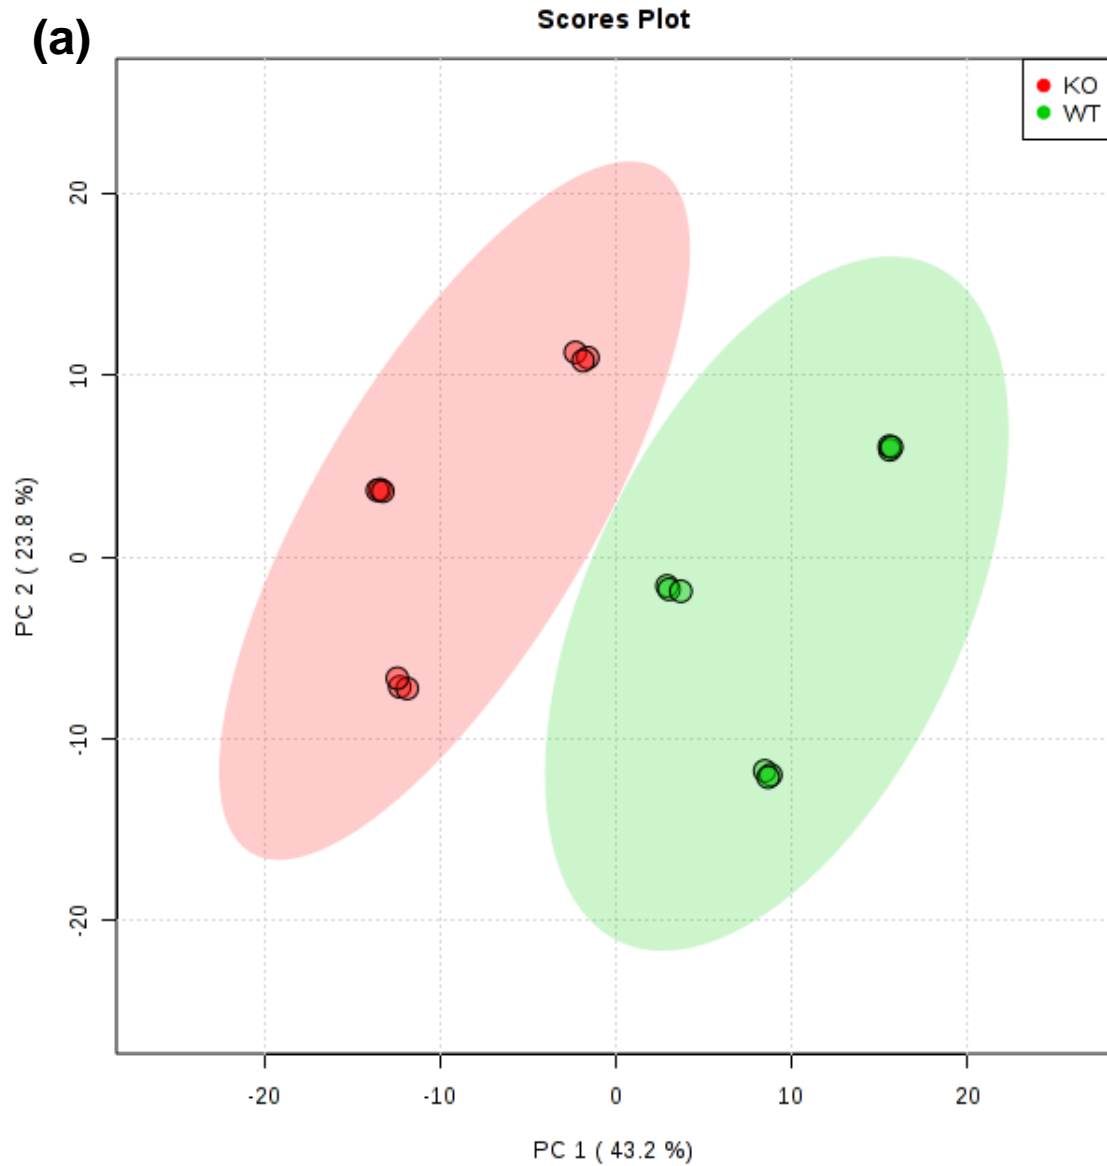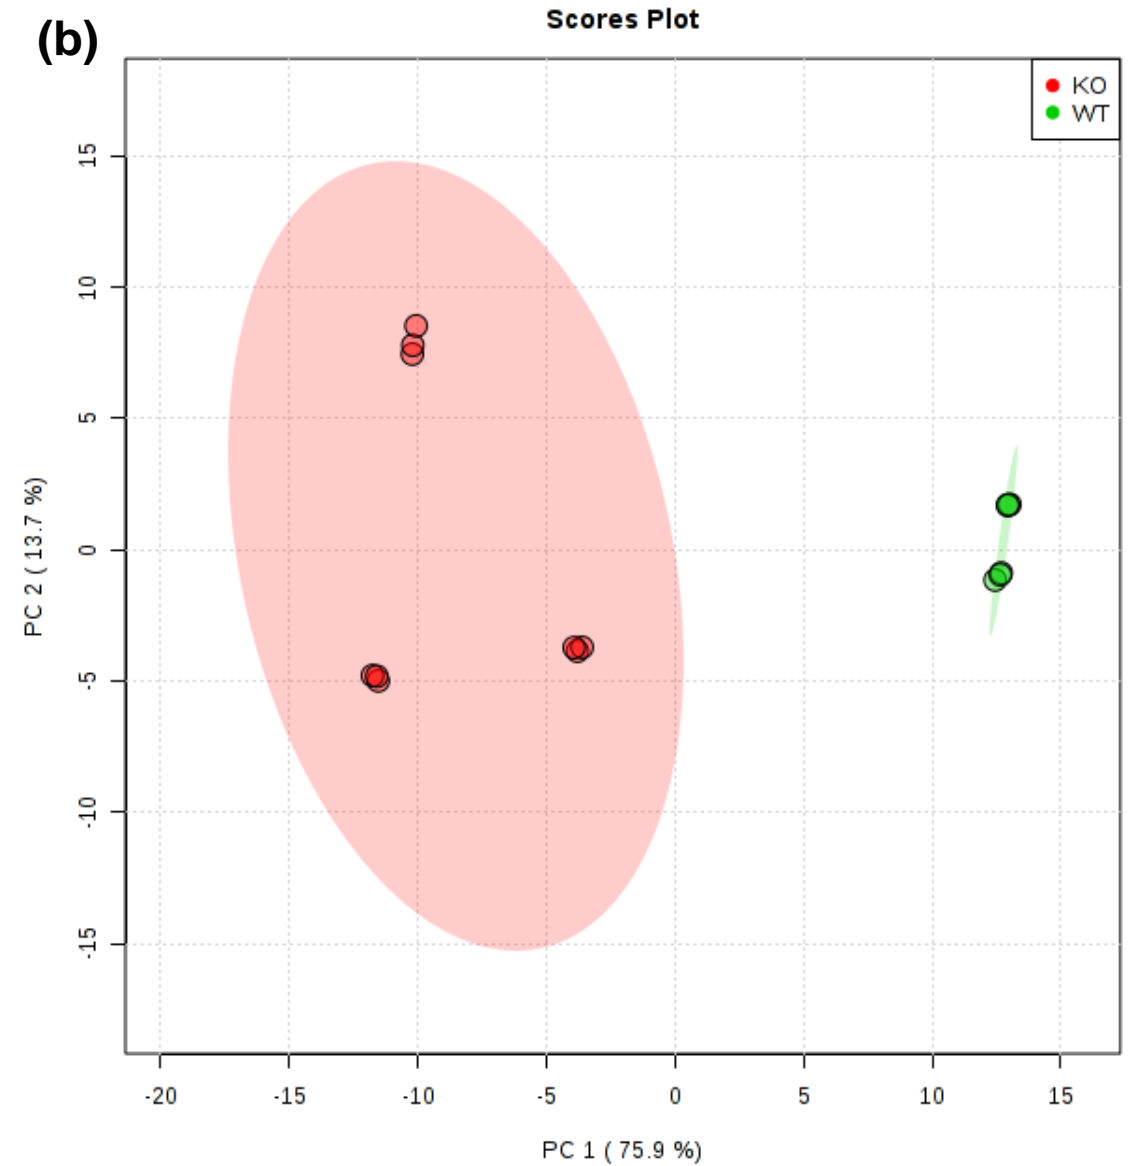

Principal component analysis of proteomics data obtained from wild type control (WT; *Pex11α*<sup>+/+</sup>) and peroxisomal biogenesis factor 11α knockout (KO; *Pex11α*<sup>-/-</sup>) mouse a) liver and b) heart tissue homogenates
