# Supplementary material for: Sequential lipidomic, metabolomic, and proteomic analyses of serum, liver, and heart tissue specimens from peroxisomal biogenesis factor 11α knockout mice
Source: PubMed Central journal article supplement (PMC8821073; doi:10.1007/s00216-021-03860-0), 2022-01-27
Supplement: 216_2021_3860_MOESM7_ESM.pdf [file 216_2021_3860_MOESM7_ESM.pdf]

**Electronic Supplementary Material\_7; Data file S3**

**Sequential lipidomic, metabolomic and proteomic analyses of serum, liver and heart tissue specimens from peroxisomal biogenesis factor 11 $\alpha$  knockout mice**

Vannuruswamy Garikapati<sup>1,2</sup>, Claudia Colasante<sup>2</sup>, Eveline Baumgart-Vogt<sup>2\*</sup>, Bernhard Spengler<sup>1\*</sup>

<sup>1</sup>Institute of Inorganic and Analytical Chemistry, Justus Liebig University Giessen, 35392 Giessen, Germany

<sup>2</sup>Institute for Anatomy and Cell Biology II, Division of Medical Cell Biology, Justus Liebig University Giessen, 35392 Giessen, Germany

**Bioinformatics analysis using PANTHER (v14.1) classification system**

**Wild type control and peroxisomal biogenesis factor 11 $\alpha$  knockout mouse liver proteome**

## Molecular functions

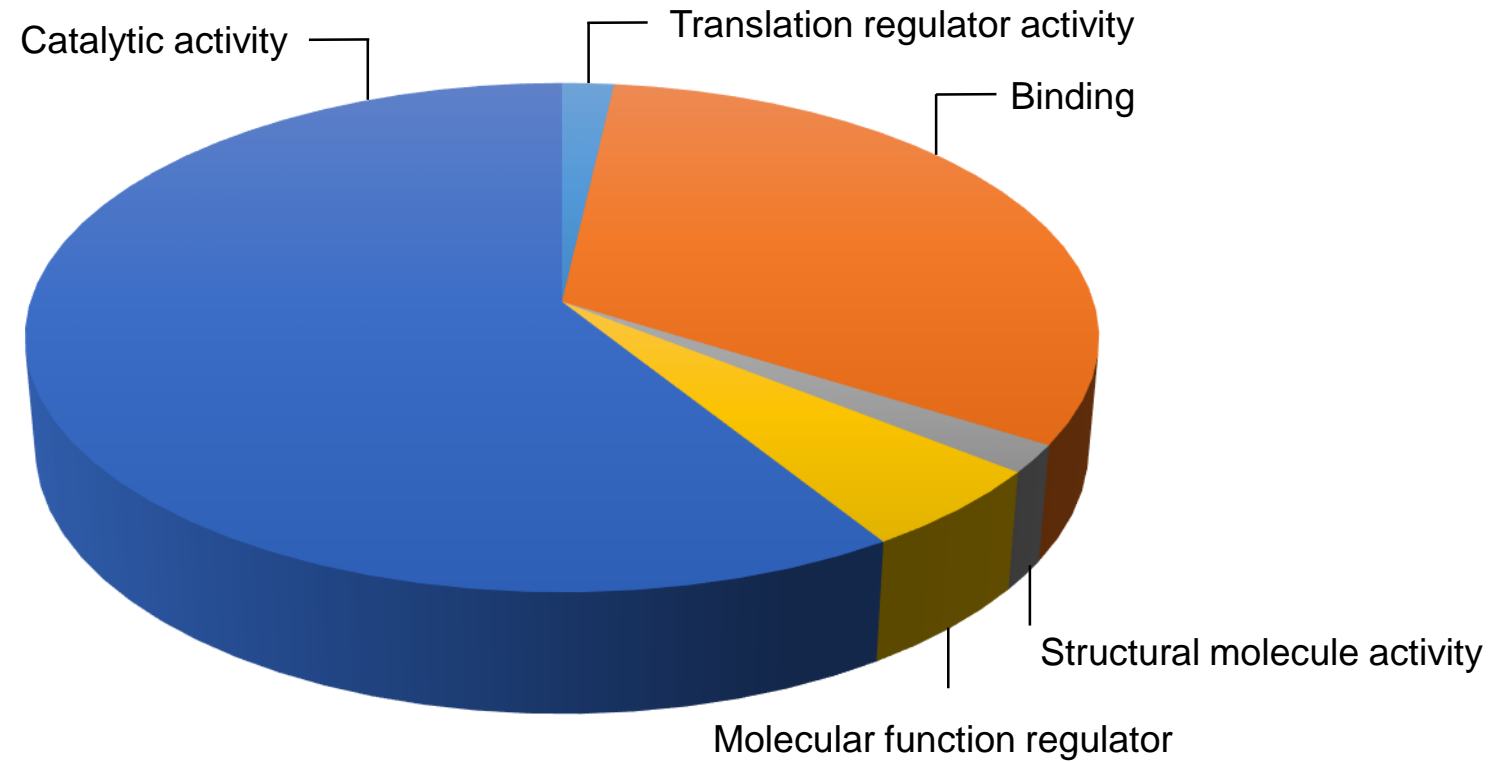

Bioinformatics analysis of the differentially abundant protein dataset (liver) depicting the molecular functions of the proteins

## Cellular components

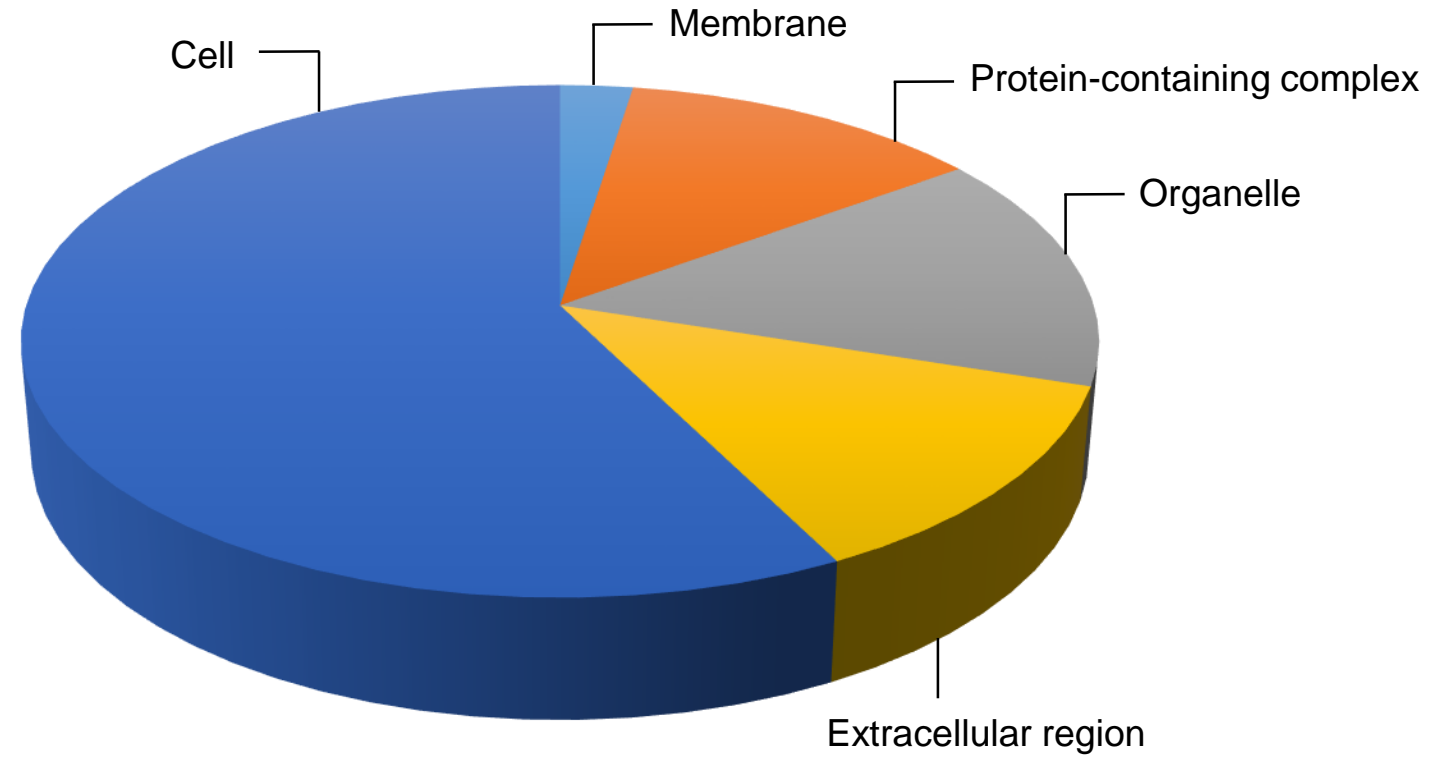

Bioinformatics analysis of the differentially abundant protein dataset (liver) depicting the cellular components of the proteins

## Pathways

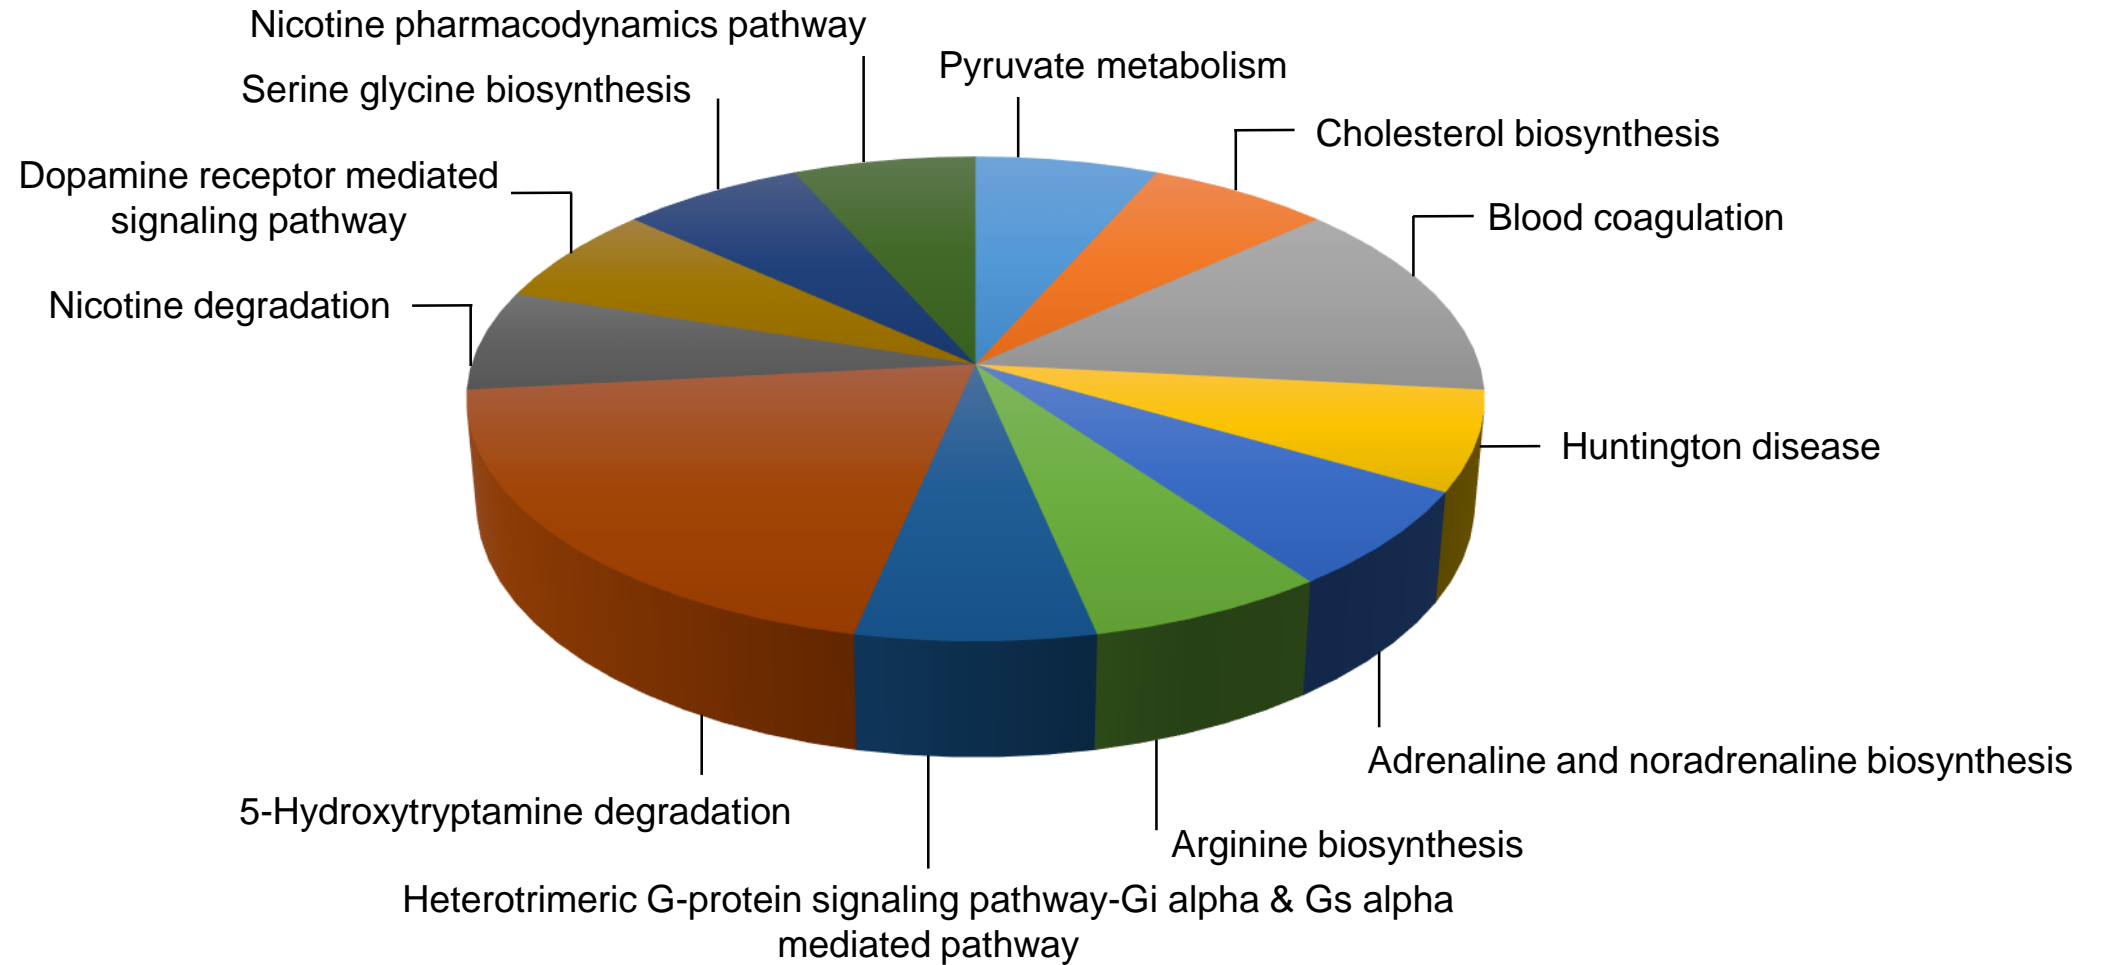

Bioinformatics analysis of the differentially abundant protein dataset (liver) depicting the pathways altered

## Protein classes

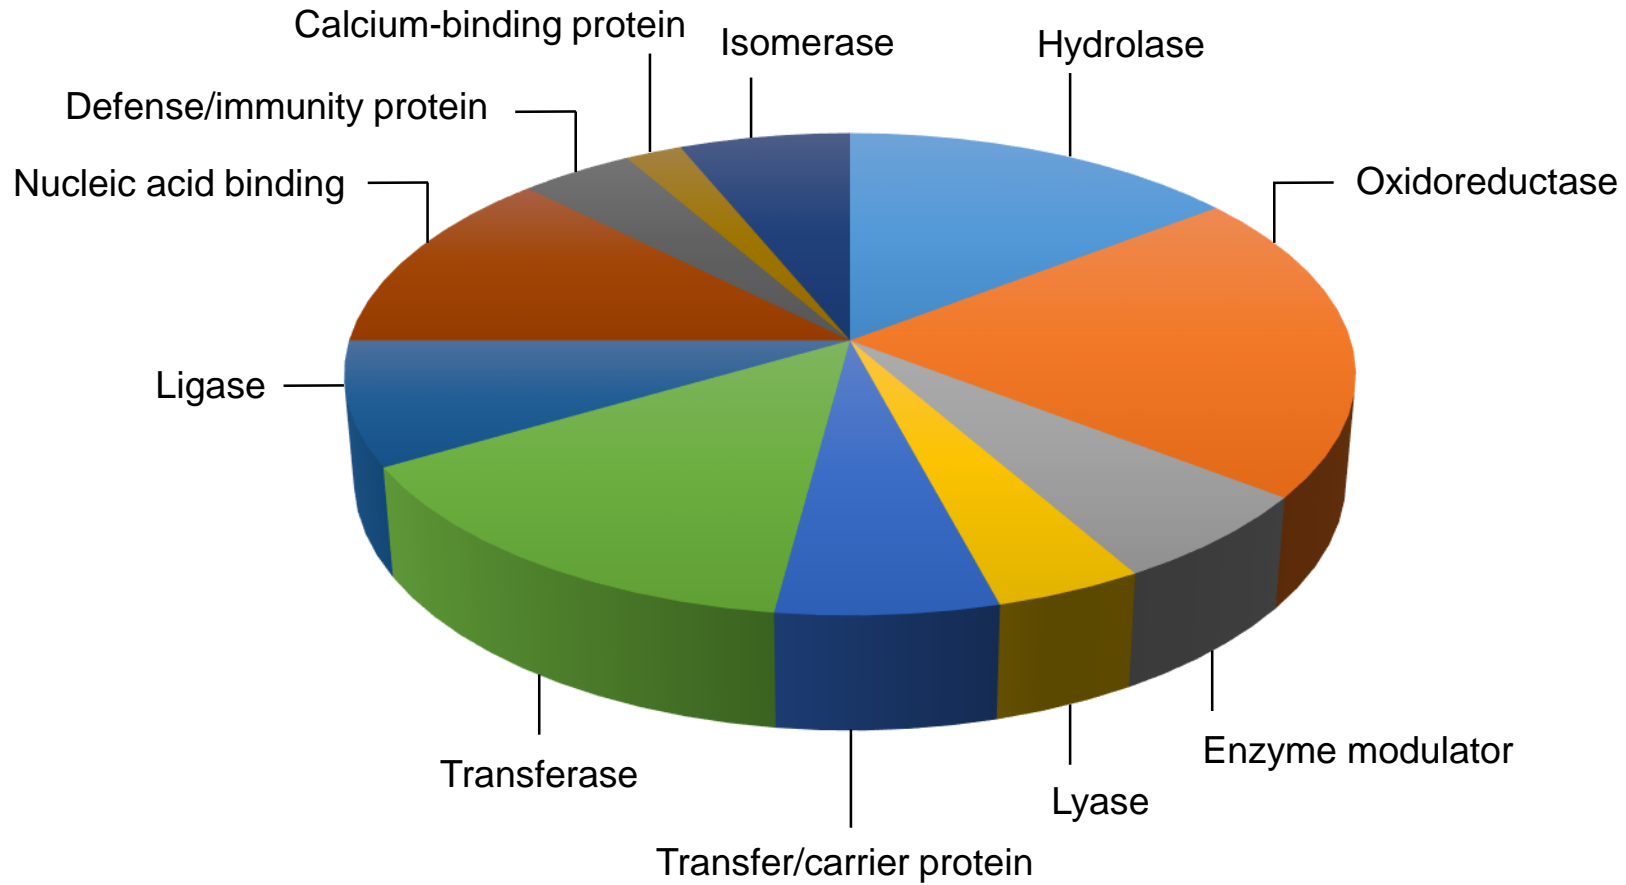

Bioinformatics analysis of the differentially abundant protein dataset (liver) depicting the protein classes

**Bioinformatics analysis using PANTHER (v14.1) classification system**

**Wild type control and peroxisomal biogenesis factor 11 $\alpha$  knockout mouse heart proteome**

## Molecular functions

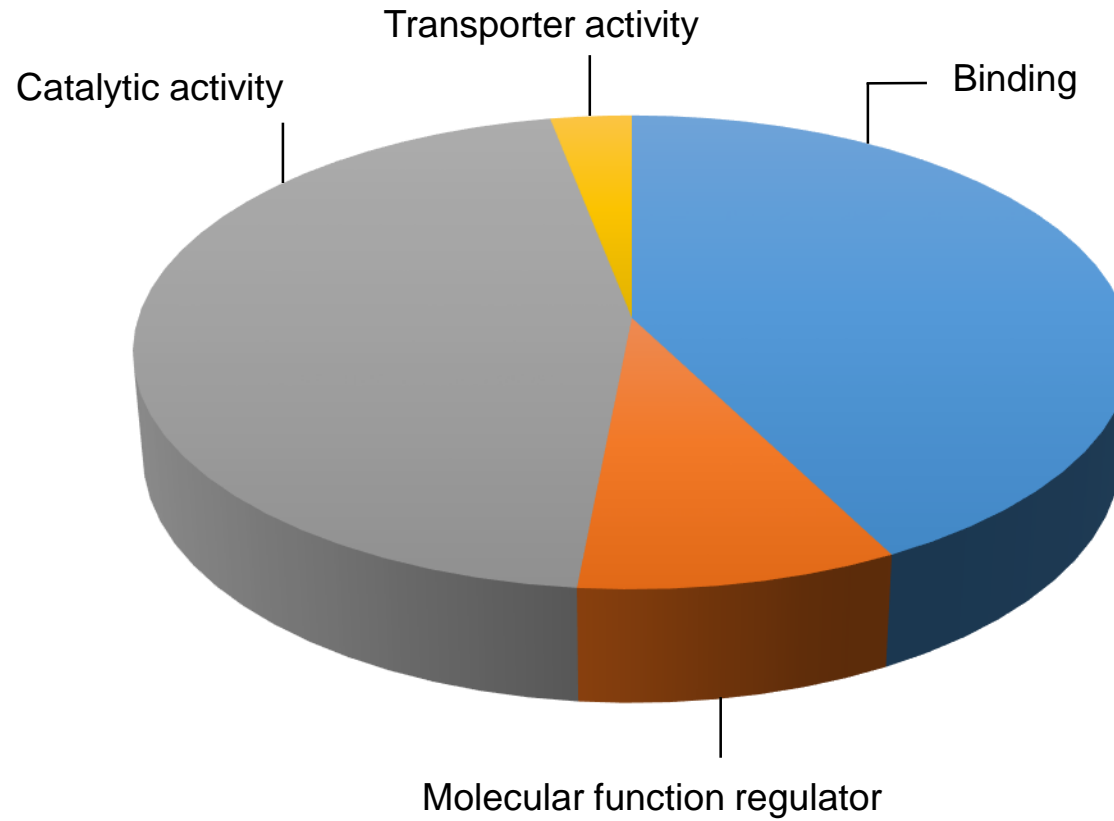

Bioinformatics analysis of the differentially abundant protein (heart) dataset depicting the molecular functions of the proteins



## Cellular components

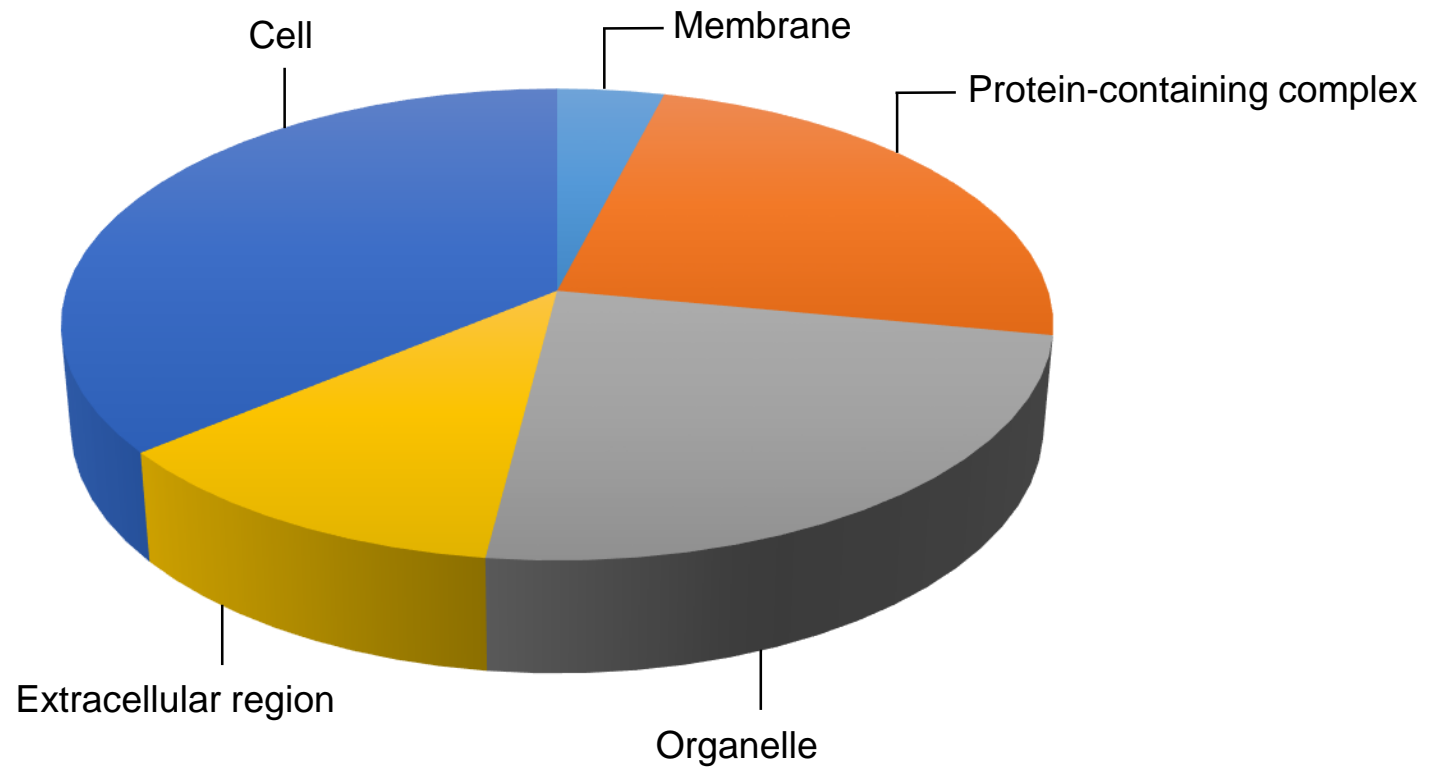

Bioinformatics analysis of the differentially abundant protein dataset (heart) depicting the cellular components of the proteins

# Pathways

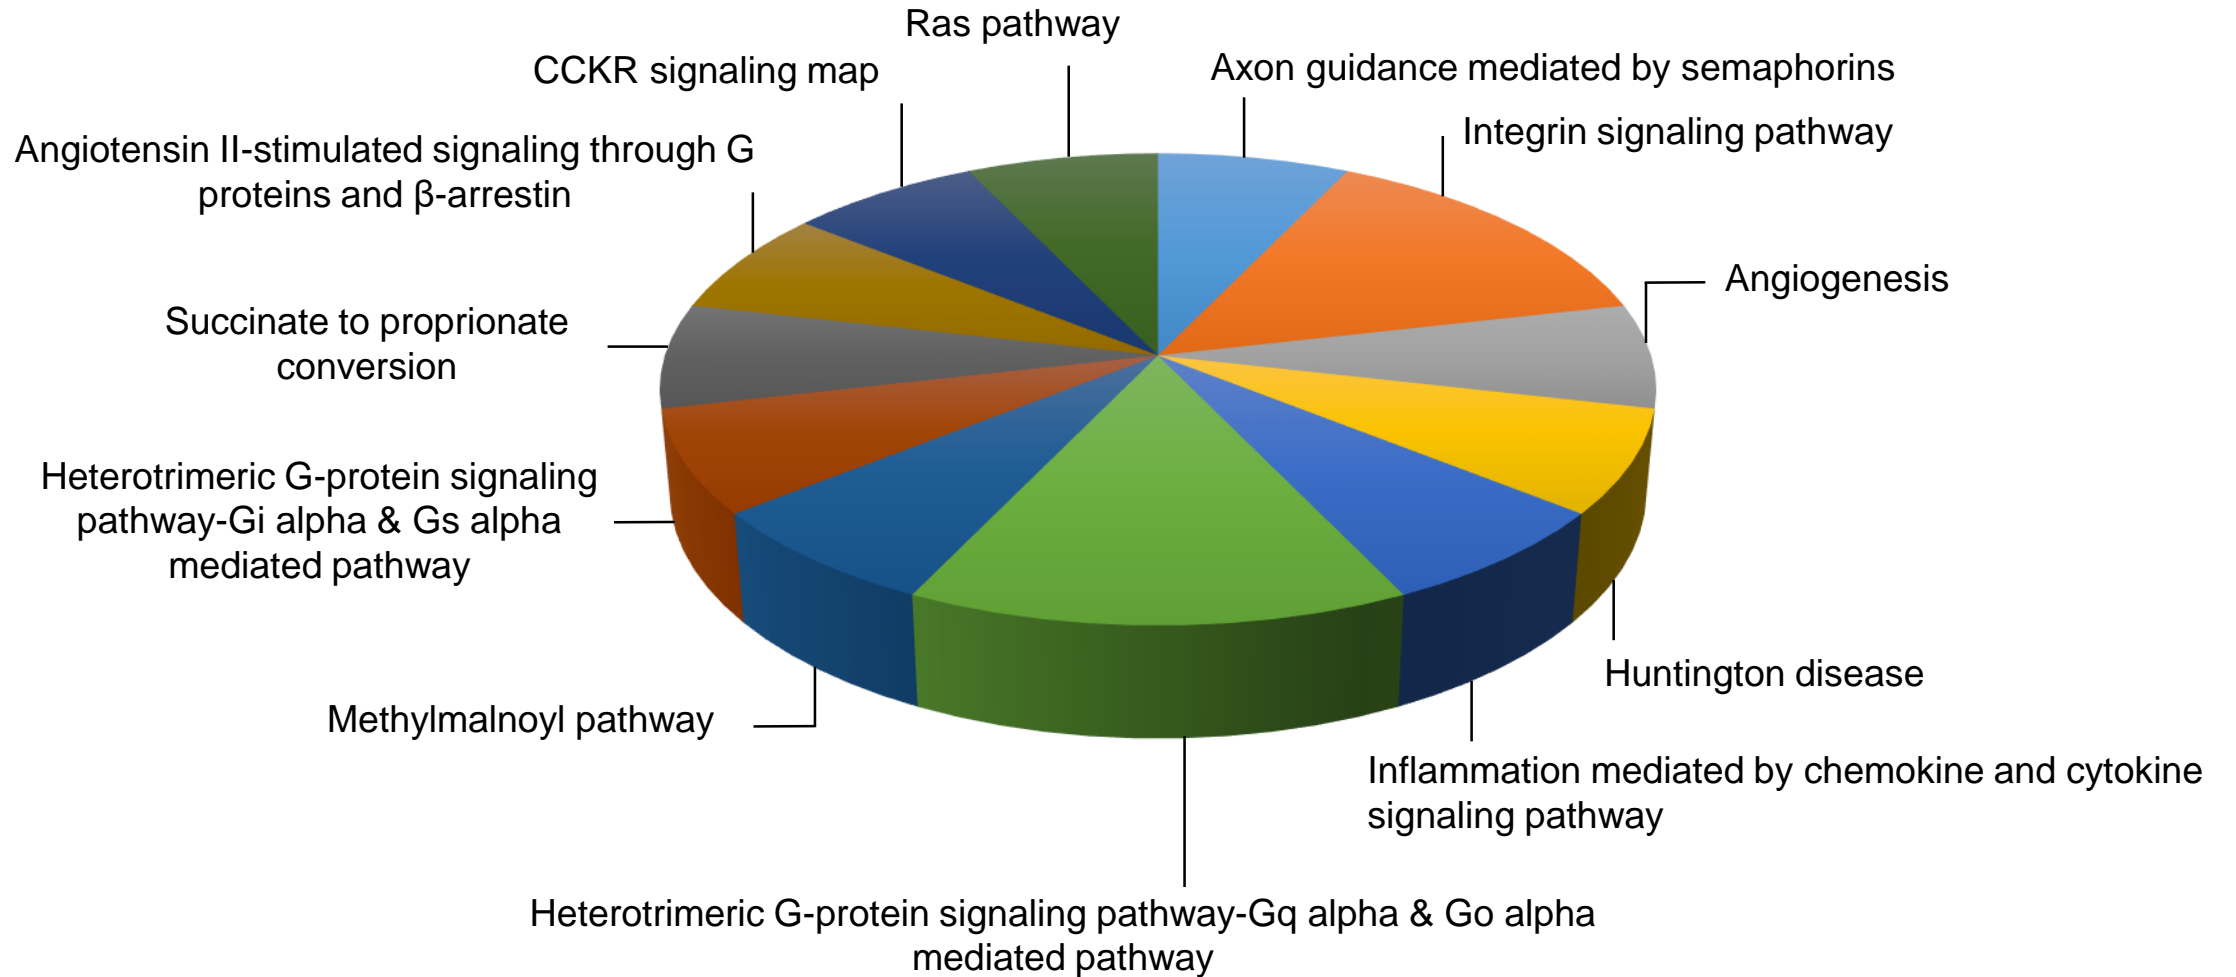

Bioinformatics analysis of the differentially abundant protein dataset (heart) depicting the pathways altered

## Protein classes

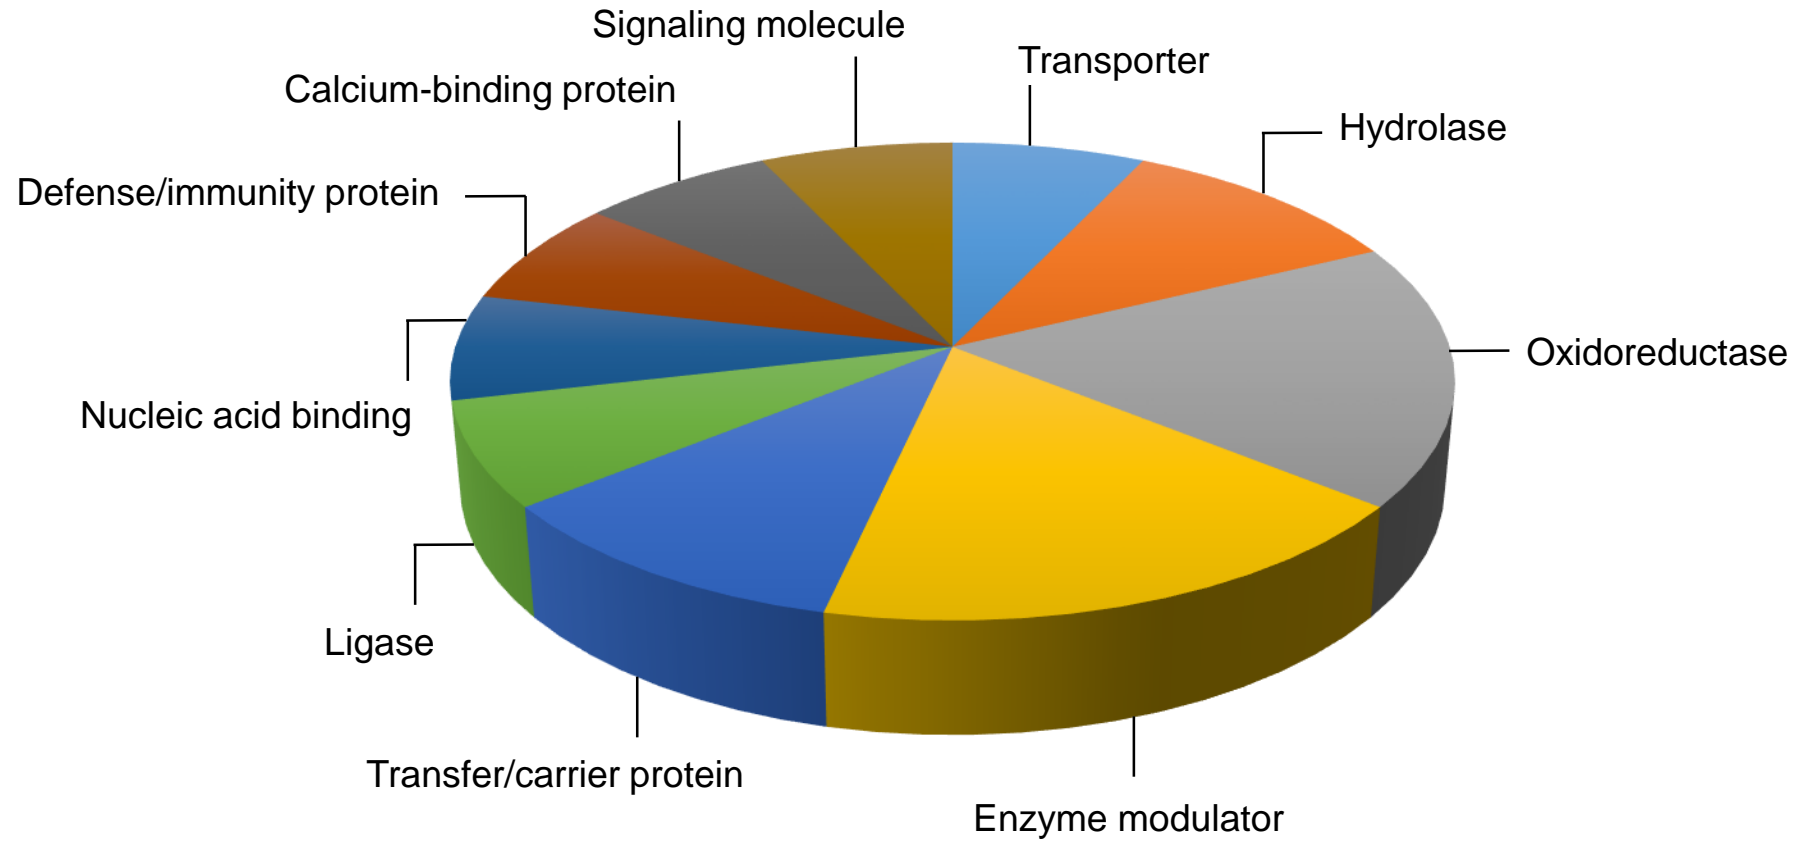

Bioinformatics analysis of the differentially abundant protein dataset (heart) depicting the protein classes

**Bioinformatics analysis using Cytoscape (v3.7.2) and BiNGO (v3.0.3)**

**Wild type control and peroxisomal biogenesis factor 11 $\alpha$  knockout mouse liver proteome**

## Molecular functions

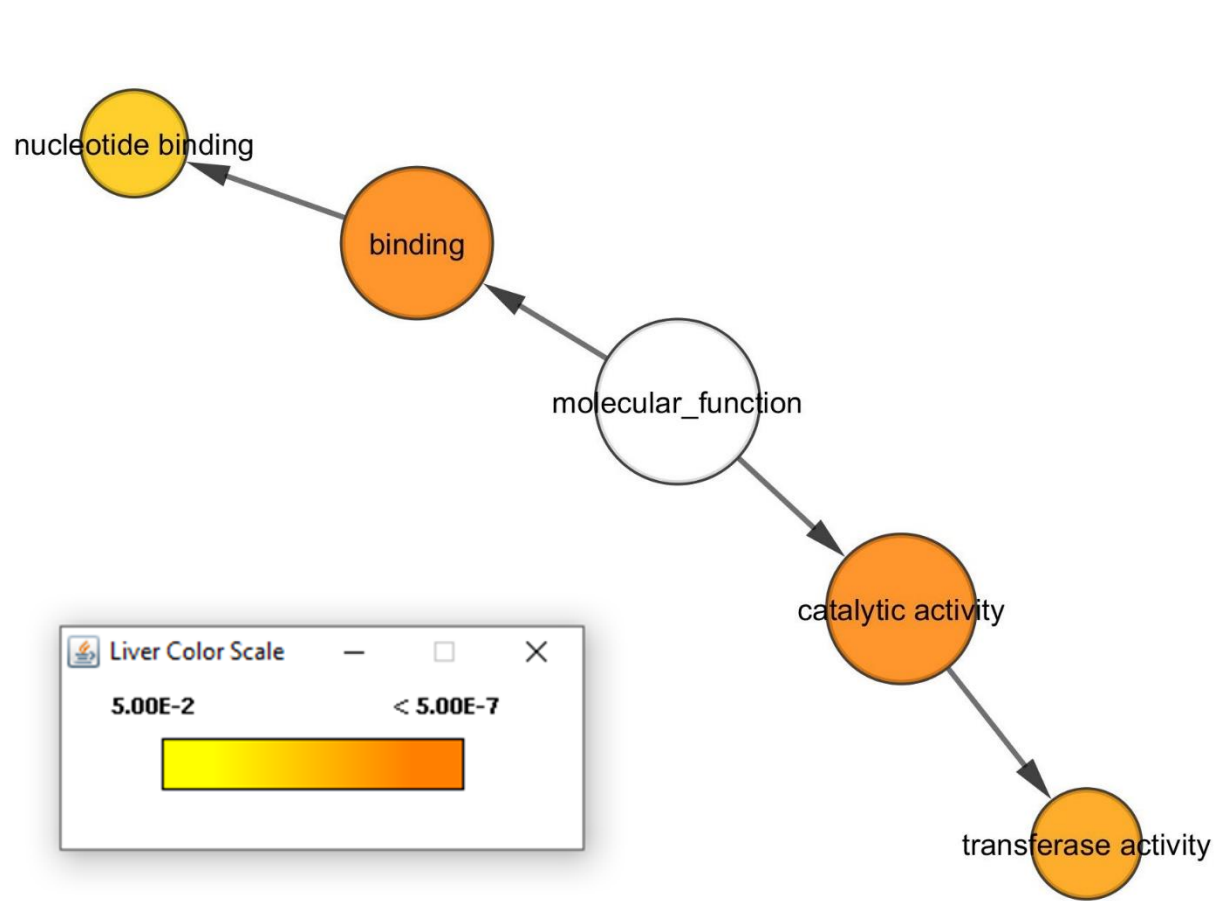

## Cellular components

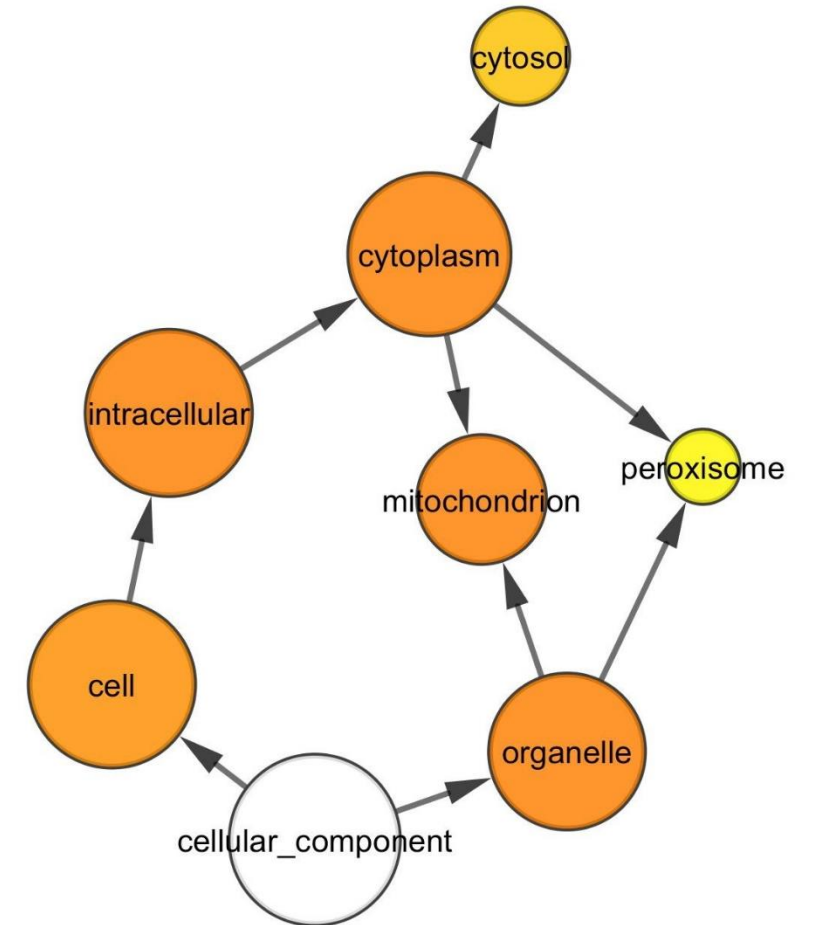

Bioinformatics analysis of the differentially abundant protein (liver) dataset depicting the molecular functions and cellular components of the proteins

**Bioinformatics analysis using Cytoscape (v3.7.2) and BiNGO (v3.0.3)**

**Wild type control and peroxisomal biogenesis factor 11 $\alpha$  knockout mouse heart proteome**

## Molecular functions

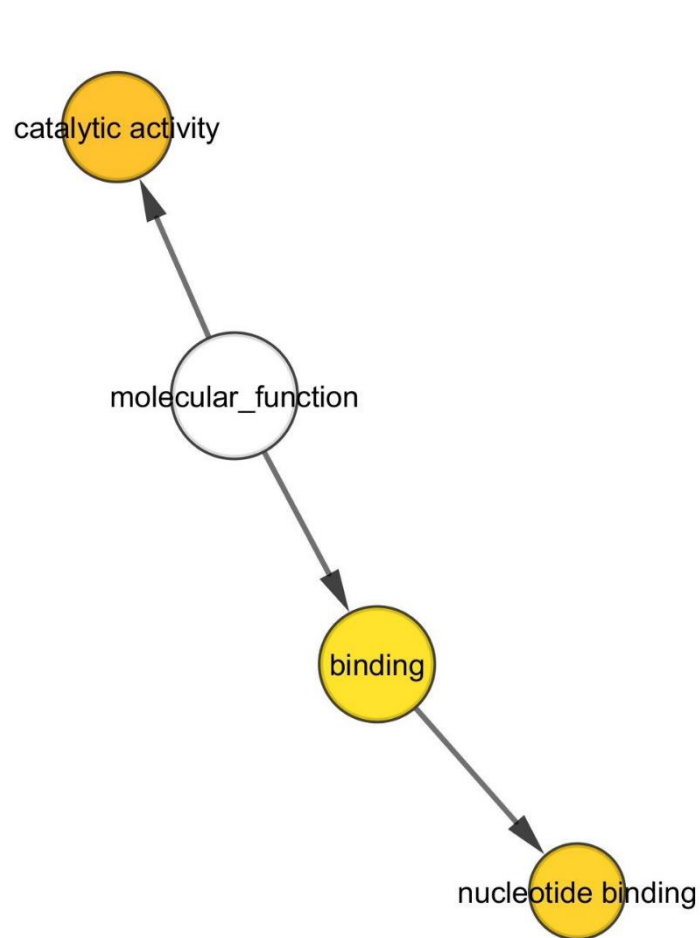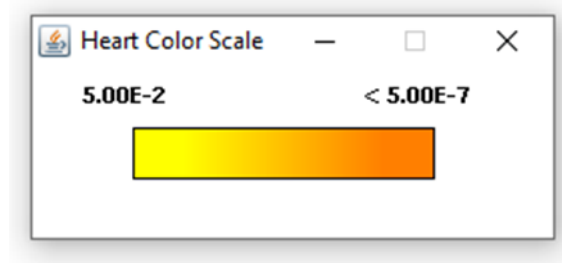

## Cellular components

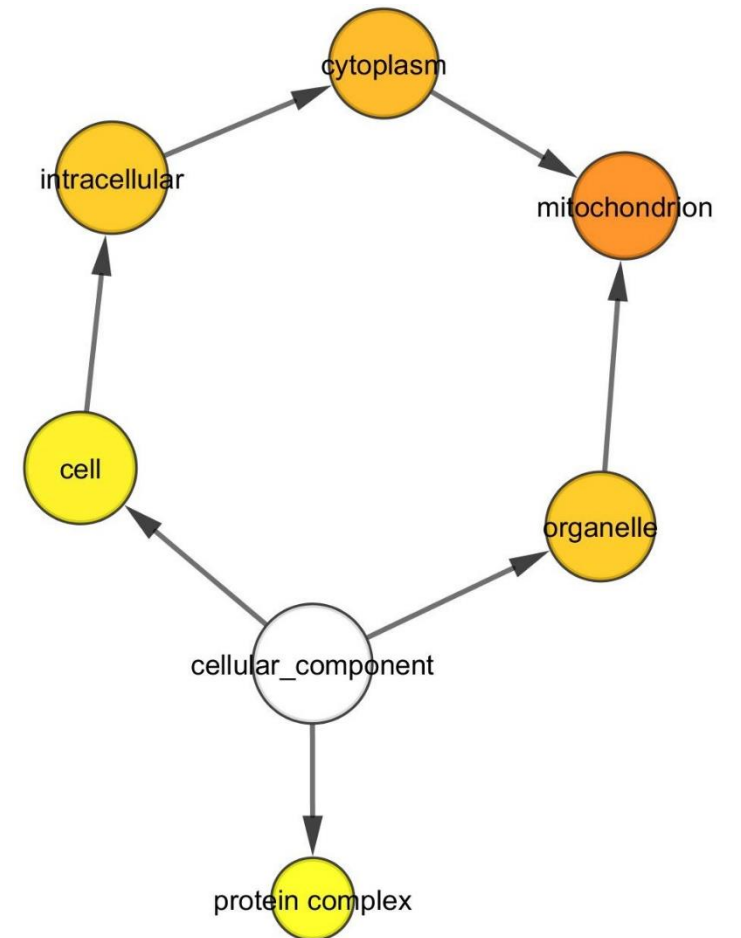

Bioinformatics analysis of the differentially abundant protein (heart) dataset depicting the molecular functions and cellular components of the proteins
